# Supplementary material for: Maternal High-Sucrose Diet Affects Phenotype Outcome in Adult Male Offspring: Role of Zbtb16
Source: Front Genet. 2020 Sep 11;11:529421. doi: 10.3389/fgene.2020.529421 (PMC7518089; doi:10.3389/fgene.2020.529421)
Supplement: Supplementary file 2 [file Table_5.xlsx]

## Sheet: TableS5a
Affymetrix ID	p-value(SHR * BAT * CTL vs. PLZF * BAT * CTL)	Fold-Change(PLZF * BAT * CTL vs SHR * BAT * CTL)	p-value(SHR * BAT * PROG vs. PLZF * BAT * PROG)	Fold-Change(PLZF * BAT * PROG vs. SHR * BAT * PROG)
17843480	7.79755e-07	1.93215	n.s.	n.s.
17608697	1.13558e-06	2.266
17786970	3.02878e-06	1.63597
17772385	9.45358e-06	-2.27523
17687457	1.0106e-05	1.7054
17823500	1.07017e-05	-3.03905

## Sheet: TableS5b
Column ID	p-value(SHR * WAT * CTL vs. PLZF * WAT * CTL)	Fold-Change(PLZF * WAT * CTL vs. SHR * WAT * CTL)	p-value(SHR * WAT * PROG vs. PLZF * WAT * PROG)	Fold-Change(PLZF * WAT * PROG vs. SHR * WAT * PROG)
17882743	1.53442e-08	-2.4337
17657331	5.90606e-07	-1.779
17766355	1.47719e-06	-1.63168
17793757	1.87664e-06	-2.79062	0.00185537	-1.83561
17627889	2.05812e-06	-1.78239
17829158	3.86265e-06	1.81162
17656347	6.69258e-06	1.33279
17817104	6.84184e-06	1.46581
17780608	7.28241e-06	-1.60484
17797868	8.6356e-06	-1.84902
17784165	8.76178e-06	-1.80758
17678140	8.79206e-06	1.53745
17833806	9.40666e-06	-1.44317
17865351	1.2962e-05	-2.30136
17830106	1.4457e-05	-1.63582
17686924	1.59769e-05	-1.64753
17639077	1.64692e-05	-1.52785	0.000279339	-1.40969
17641440	1.77453e-05	-1.51662
17659582	2.17448e-05	2.03974
17663335	2.31518e-05	1.64808
17882047	2.59648e-05	-1.99336
17754627	2.64082e-05	-1.65228
17690071	3.14151e-05	2.57496
17669860	3.35185e-05	-2.07001	0.000482057	-1.80322
17717140	3.40208e-05	-1.90081
17739054	3.6677e-05	-1.52635
17788323	3.67442e-05	1.46678
17641358	3.7338e-05	1.23392
17876613	3.7338e-05	1.23392
17669429	3.94618e-05	-1.90287
17622570	4.43032e-05	-2.29869
17754561	4.79456e-05	2.11347
17871080	4.82823e-05	2.22298
17677604	4.87869e-05	-1.5322
17640120	5.04668e-05	-1.48472
17784866	5.48075e-05	-1.5465
17659491	5.65248e-05	-1.502
17719660	6.09229e-05	-3.46634
17867251	6.27962e-05	1.95145
17733845	6.46152e-05	-1.44916
17633993	6.78242e-05	-1.96004
17852130	7.41554e-05	-1.48959
17714902	7.71329e-05	1.5715
17828528	7.85655e-05	1.63038
17746452	8.11031e-05	-1.45625
17691436	8.19512e-05	-1.42272
17817059	8.35066e-05	-1.67625
17671175	9.04119e-05	-1.30009	8.87272e-05	-1.30058
17882637	9.04563e-05	-1.84638
17844538	9.8424e-05	-1.59891
17832808	0.000102608	1.85739
17622590	0.000108385	1.50287
17869182	0.000109148	-1.52316
17758413	0.000110742	-1.85211
17635168	0.000113546	-1.66055
17883157	0.000118289	1.19364
17728422	0.000121237	-1.33584
17603409	0.000136374	2.49859
17710177	0.000138156	-1.40551
17721298	0.000142006	-1.29171
17837628	0.000142131	-1.59315	0.00186434	-1.44416
17845682	0.000147006	1.44344
17862210	0.000149791	-1.55711
17674437	0.000152408	-1.37259
17813635	0.000153773	1.97761
17605669	0.000154216	1.91992
17806027	0.000160683	-1.80245
17815320	0.000163712	2.32572
17782128	0.00016797	-1.57564
17782466	0.000169177	-1.45834
17629374	0.000171646	-1.25555
17742689	0.000173279	-1.75105
17860505	0.000178779	1.61788
17656817	0.000179346	-1.4676
17710972	0.000180254	-1.41398
17723519	0.000181626	2.56553
17645797	0.000182283	-1.37932
17692790	0.000192535	1.93001
17761493	0.000193754	-1.47203
17790666	0.000196431	1.97228
17677052	0.000205574	-1.40403
17770484	0.000212124	-1.55092	0.00188714	-1.42938
17742246	0.000218264	1.94981
17611549	0.000221513	1.78994
17874856	0.000227378	1.72367
17717113	0.000232357	1.48202
17721057			6.87932e-09	3.40126
17778005			7.46344e-09	85.116
17760025			9.56076e-09	112.735
17704157			1.10373e-08	55.8474
17764597			1.12024e-08	23.0613
17767085			1.13271e-08	78.8306
17850931			1.44447e-08	151.951
17863213			1.59699e-08	64.0966
17735924			1.59888e-08	18.6687
17699521			1.60303e-08	96.6524
17778010			1.68186e-08	68.4313
17825279			1.75975e-08	28.7097
17749443			2.07911e-08	14.1347
17760098			2.25278e-08	141.056
17843061			2.30645e-08	65.6487
17882741			2.37571e-08	64.174
17712738			2.62853e-08	74.2956
17715886			2.76271e-08	110.08
17670575			3.03672e-08	22.7919
17756404			3.03767e-08	59.4782
17685367			3.08771e-08	89.3832
17635957			3.15978e-08	50.9928
17663641			3.18219e-08	52.4577
17778336			3.32643e-08	7.96584
17752821			3.75762e-08	53.0448
17767091			3.77004e-08	51.8546
17881515			3.79616e-08	8.50489
17703695			3.96364e-08	111.794
17760041			4.01436e-08	18.9486
17865147			4.11022e-08	-1.67379
17758189			4.24729e-08	8.27841
17805646			4.56748e-08	31.5335
17667478			4.67406e-08	34.0052
17698119			4.7553e-08	57.953
17767309			4.99365e-08	14.3924
17881913			5.05826e-08	38.5865
17882723			5.242e-08	10.4227
17722920			6.14359e-08	17.2306
17810274			6.6404e-08	18.8466
17773233			6.7498e-08	11.3715
17778340			6.88375e-08	48.8435
17739425			7.80961e-08	5.9113
17809498			7.81854e-08	13.3156
17704086			8.0475e-08	100.578
17756437			8.36799e-08	16.4706
17664328			8.57053e-08	23.3889
17650407			8.70239e-08	17.3059
17878914			8.73103e-08	11.7901
17758690			8.94307e-08	18.189
17658916			1.12434e-07	15.1411
17811491			1.1457e-07	11.4374
17828777			1.28136e-07	11.1249
17719453			1.36125e-07	5.21057
17666436			1.49523e-07	8.64527
17779231			1.50507e-07	12.5174
17666684			1.51537e-07	5.04961
17803516			1.52507e-07	14.3035
17709019			1.72992e-07	73.1848
17866228			1.79621e-07	10.7092
17876157			1.83399e-07	14.023
17863226			2.00486e-07	5.80617
17683339			2.06959e-07	4.26423
17738441			2.07158e-07	5.98402
17661706			2.12107e-07	6.26412
17639991			2.25938e-07	6.44323
17702063			2.3435e-07	2.43228
17699515			2.54517e-07	30.832
17774051			2.58284e-07	9.19767
17794404			2.72106e-07	7.61385
17626665			2.80281e-07	10.2335
17617612			2.92158e-07	8.59629
17864114			2.94281e-07	5.01001
17757820			3.19578e-07	7.8921
17679423			3.57772e-07	4.1014
17854352			3.97519e-07	4.01062
17796778			4.04538e-07	1.9195
17863229			4.23525e-07	8.40701
17846148			4.37639e-07	4.39458
17715083			4.84572e-07	2.91621
17850334			4.90712e-07	1.76915
17823218			4.93297e-07	3.35823
17769633			5.1054e-07	8.58642
17762720			5.25852e-07	6.91428
17801686			5.57819e-07	3.85148
17689310			5.71254e-07	3.94182
17768324			5.83275e-07	50.6883
17854612			5.87857e-07	4.60147
17878226			5.88108e-07	4.1023
17702089			6.27644e-07	20.7503
17639986			6.33223e-07	5.84867
17696819			6.46087e-07	2.46029
17688485			6.4894e-07	17.6376
17791365			6.5439e-07	3.70291
17634095			6.63663e-07	4.95109
17813552			7.15554e-07	3.53668
17791383			7.49875e-07	2.63471
17776430			7.73118e-07	6.64782
17663630			7.86658e-07	8.93713
17766478			8.33581e-07	3.55694
17625194			8.41971e-07	2.42214
17700075			8.4363e-07	3.01389
17694385			8.45294e-07	5.29792
17726747			8.57193e-07	2.20057
17705225			8.70667e-07	7.50796
17614194			8.73972e-07	4.77706
17705205			9.3434e-07	7.57764
17675915			9.91306e-07	2.7103
17630489			9.98013e-07	3.39326
17729962			1.05401e-06	3.03622
17641253			1.06464e-06	3.30007
17690484			1.08552e-06	3.19197
17792684			1.26052e-06	1.4123
17763179			1.29645e-06	3.32245
17624812			1.39065e-06	14.4694
17776731			1.39542e-06	3.62627
17719197			1.40403e-06	5.68895
17755212			1.41476e-06	7.56329
17842323			1.45674e-06	3.92924
17616389			1.51501e-06	2.52089
17809602			1.51964e-06	1.91437
17643087			1.61391e-06	8.66602
17685482			1.63997e-06	4.15328
17797492			1.65714e-06	10.9288
17615800			1.68015e-06	3.45685
17860769			1.69799e-06	2.64906
17874961			1.73616e-06	3.99162
17705239			1.88318e-06	7.92056
17767380			1.88967e-06	3.90904
17762269			1.91689e-06	3.83718
17685904			1.95134e-06	3.62398
17754983			1.96636e-06	2.202
17791796			2.03694e-06	4.46318
17828757			2.1019e-06	4.90734
17610750			2.1678e-06	8.10237
17882667			2.24692e-06	4.7256
17815693			2.30358e-06	2.65472
17670084			2.44359e-06	3.8409
17824691			2.50439e-06	9.82678
17861019			2.64427e-06	3.50596
17760057			3.01541e-06	31.5121
17656767			3.13954e-06	4.90367
17857692			3.16148e-06	2.66253
17767371			3.21513e-06	16.1087
17667237			3.23101e-06	5.32805
17779108			3.2381e-06	2.32877
17631385			3.24261e-06	2.5759
17800390			3.24765e-06	2.27908
17707729			3.32149e-06	2.60218
17677050			3.34151e-06	-1.4635
17741566			3.35432e-06	3.73711
17874214			3.42834e-06	-1.88205
17796482			3.50713e-06	2.30133
17735357			3.52174e-06	11.8358
17815482			3.55122e-06	5.71301
17775166			3.55718e-06	3.10603
17704136			3.61101e-06	6.05675
17742667			3.99001e-06	9.36191
17669974			4.21813e-06	3.46035
17765662			4.31636e-06	2.76349
17676588			4.33538e-06	2.34798
17681500			4.43192e-06	-1.95667
17801432			4.44231e-06	2.45637
17823363			4.70038e-06	1.66162
17871099			4.86083e-06	2.48574
17783651			5.00034e-06	4.5405
17827262			5.07558e-06	3.10271
17882399			5.09094e-06	6.87822
17704112			5.32537e-06	1.82283
17702607			5.40915e-06	1.70643
17806641			5.56105e-06	2.26315
17746022			5.6966e-06	2.88461
17749411			5.76937e-06	2.1929
17822812			5.9581e-06	3.60155
17871063			6.30455e-06	2.60521
17844360			6.31841e-06	2.44256
17873000			6.48802e-06	2.18405
17695587			6.66361e-06	3.24522
17816867			6.69695e-06	2.11223
17825799			6.8336e-06	2.54477
17842599			7.00579e-06	-5.4218
17744528			7.22664e-06	2.05039
17882653			7.30444e-06	2.47548
17617131			7.49419e-06	5.51942
17728106			7.56751e-06	3.12268
17760548			7.74226e-06	3.51346
17637077			7.91057e-06	2.30418
17700688			7.94022e-06	2.23901
17669076			8.01701e-06	2.93229
17668012			8.14129e-06	1.82801
17819866			8.57415e-06	2.54061
17810919			8.60485e-06	3.99626
17723973			8.85507e-06	-1.66764
17637528			9.25121e-06	1.57314
17681515			9.60353e-06	6.30285
17655759			9.85567e-06	1.96955
17658637			9.8596e-06	10.1313
17658054			1.00692e-05	3.00842
17704786			1.0908e-05	1.97946
17789858			1.10583e-05	3.04254
17770299			1.13291e-05	4.66475
17675019			1.14214e-05	3.05584
17880546			1.16642e-05	2.01766
17669997			1.19613e-05	2.10383
17861938			1.21004e-05	1.64231
17831510			1.21107e-05	3.56114
17698131			1.21653e-05	2.88048
17882005			1.2273e-05	11.6334
17846830			1.2824e-05	5.1031
17673745			1.28821e-05	2.81861
17815588			1.29428e-05	2.66205
17792516			1.31442e-05	3.36673
17644425			1.32751e-05	2.23405
17680295			1.34468e-05	1.79978
17691449			1.34569e-05	3.37556
17671549			1.37494e-05	5.8085
17855233			1.38868e-05	4.4098
17694042			1.39685e-05	1.72911
17656515			1.40379e-05	2.55277
17848396			1.4249e-05	3.21518
17845302			1.44342e-05	1.64954
17706140			1.47177e-05	3.41286
17732321			1.4862e-05	2.95075
17882421			1.48645e-05	4.06598
17833071			1.55042e-05	2.94951
17702603			1.64913e-05	1.65656
17850757			1.66733e-05	3.54708
17881357			1.70142e-05	10.9257
17657933			1.73561e-05	2.0721
17645070			1.74341e-05	3.15542
17776388			1.81767e-05	2.54423
17702605			1.82748e-05	1.70222
17661238			1.83388e-05	2.05828
17637841			1.83755e-05	1.71536
17805837			1.84805e-05	4.82177
17647616			1.84859e-05	4.77231
17703698			1.87875e-05	2.03902
17781735			1.92092e-05	9.31697
17746918			1.97972e-05	2.72805
17777003			1.98133e-05	3.09828
17673030			1.99138e-05	2.79079
17803461			2.10943e-05	2.00247
17779039			2.11843e-05	2.46633
17882291			2.1609e-05	2.07622
17831297			2.34722e-05	6.28485
17743371			2.37472e-05	2.26393
17817947			2.39969e-05	3.27897
17748476			2.40537e-05	-1.6179
17621531			2.47907e-05	2.49921
17816993			2.49289e-05	-3.20058
17876049			2.51223e-05	3.13204
17612367			2.56025e-05	1.79196
17831571			2.60158e-05	1.80942
17853855			2.65367e-05	10.1261
17881969			2.71514e-05	2.64207
17822697			2.75026e-05	2.81879
17669921			2.81707e-05	1.85605
17624829			2.82344e-05	2.73518
17856700			2.88858e-05	2.4574
17882089			2.90697e-05	1.66401
17730769			3.00681e-05	2.51582
17641621			3.03684e-05	-4.00672
17840794			3.04383e-05	2.80606
17670177			3.07065e-05	2.10395
17797383			3.08136e-05	4.48581
17813676			3.11502e-05	1.8393
17686720			3.1165e-05	1.71617
17858747			3.12198e-05	2.80572
17691076			3.14312e-05	3.51366
17664107			3.22242e-05	4.57827
17828852			3.23972e-05	3.32263
17678383			3.30432e-05	2.76854
17642339			3.33914e-05	2.36699
17877004			3.3787e-05	2.01162
17828155			3.4048e-05	3.21929
17621491			3.45784e-05	2.56202
17666890			3.4809e-05	1.52198
17752811			3.55475e-05	1.60948
17640560			3.57685e-05	2.1313
17842051			3.60437e-05	2.50522
17714143			3.62618e-05	2.30563
17669576			3.62813e-05	1.69953
17805121			3.69975e-05	2.60084
17643566			3.72982e-05	3.16175
17704470			3.74885e-05	2.44992
17882713			3.81805e-05	2.07161
17835936			3.81964e-05	2.66069
17877062			3.84942e-05	5.88375
17799894			3.99551e-05	3.1539
17791157			4.0502e-05	2.27959
17860022			4.21334e-05	1.78724
17819862			4.32178e-05	3.12229
17789932			4.34556e-05	2.15738
17660303			4.39919e-05	3.05429
17630554			4.40561e-05	1.44871
17611354			4.45274e-05	2.47915
17641121			4.51389e-05	3.89927
17776449			4.55579e-05	1.81053
17800148			4.55975e-05	3.66945
17731681			4.72127e-05	1.96672
17871209			4.75444e-05	1.85843
17881981			4.79287e-05	2.19822
17655314			4.83814e-05	1.50844
17869318			4.91954e-05	2.49615
17828139			4.99248e-05	-1.55861
17802816			5.02605e-05	2.92201
17752186			5.08813e-05	5.02883
17875511			5.22215e-05	2.32535
17716946			5.28325e-05	-1.4566
17710902			5.31269e-05	4.0721
17732734			5.31519e-05	1.90946
17783921			5.32109e-05	2.69515
17741886			5.34078e-05	1.64211
17731202			5.3558e-05	14.688
17854989			5.38124e-05	-1.44534
17822649			5.38893e-05	3.5644
17622887			5.43704e-05	3.76919
17674691			5.52134e-05	2.07545
17763285			5.59329e-05	3.06451
17686687			5.8386e-05	2.30917
17677169			5.86943e-05	1.47645
17681886			5.94896e-05	2.7866
17746727			6.0796e-05	1.99412
17709394			6.15611e-05	2.32872
17777463			6.50405e-05	1.94511
17875144			6.51466e-05	2.4556
17790986			6.52389e-05	2.78639
17825345			6.73312e-05	2.32984
17664476			6.85155e-05	-2.47531
17805652			6.85912e-05	3.44583
17882981			6.85912e-05	3.44583
17766853			6.89416e-05	2.10133
17829013			6.93971e-05	2.46727
17748690			6.9665e-05	3.49933
17625445			7.10093e-05	2.20389
17749419			7.21742e-05	1.991
17689302			7.39172e-05	2.31261
17681885			7.4009e-05	3.42544
17807094			7.49653e-05	1.9717
17654574			7.50318e-05	-1.51921
17705532			7.63844e-05	1.81541
17848495			7.71689e-05	2.10229
17681879			7.75956e-05	2.45686
17881915			8.08253e-05	2.02731
17664120			8.10293e-05	3.26593
17748728			8.18273e-05	3.82205
17880121			8.29432e-05	2.18432
17651928			8.47699e-05	2.23847
17850369			8.54921e-05	-1.60629
17803776			8.6799e-05	-1.44888
17622836			8.70489e-05	2.25139
17798642			8.72841e-05	2.23065
17768849			8.83768e-05	3.99481
17653763			8.91189e-05	3.28842
17814100			9.07238e-05	14.9401
17720162			9.09881e-05	2.71481
17857942			9.2978e-05	2.45944
17849243			9.35571e-05	2.47325
17839861			9.60794e-05	3.16821
17811287			9.69726e-05	3.88965
17871271			9.73433e-05	3.32572
17683259			9.74516e-05	3.54597
17707123			9.83951e-05	1.69139
17653063			9.96079e-05	1.87754
17753567			0.00010355	2.35363
17756314			0.000103982	-1.26367
17772562			0.000105282	2.0486
17858789			0.000106024	1.87804
17712112			0.000107771	1.82065
17878725			0.000108546	2.06166
17748786			0.000110117	1.87658
17880308			0.000111341	2.228
17843596			0.000116457	2.82357
17622517			0.000118549	1.89505
17751939			0.000120939	3.03778
17751495			0.000121464	4.3457
17804270			0.0001218	1.63528
17695830			0.000121903	2.08676
17796638			0.000123029	1.68232
17840257			0.000127046	-1.67483
17862402			0.000129916	1.52649
17798926			0.000130067	1.68698
17827115			0.000130167	1.6863
17728701			0.000131901	1.828
17807172			0.000131904	1.66734
17861254			0.000132301	1.97671
17702606			0.000133809	1.61402
17674356			0.000137404	-1.52601
17603171			0.000138261	5.22687
17862429			0.000140746	1.93049
17632361			0.000140914	2.85767
17844579			0.000142524	1.53025
17854165			0.000142717	2.10896
17827700			0.000143334	-2.11955
17745068			0.000145107	2.27657
17678891			0.000145384	-1.60594
17874142			0.000146688	1.57436
17702604			0.000147678	1.68041
17716920			0.000148956	2.36519
17816040			0.000149032	1.52972
17643106			0.000149865	-1.52811
17819286			0.000150755	1.74922
17802269			0.000151606	1.80098
17805132			0.000153181	1.71291
17684270			0.000153187	1.93019
17847870			0.000153496	-1.41756
17680902			0.00015365	4.00537
17682828			0.000155406	2.04358
17804352			0.000157235	1.75367
17611159			0.000157588	3.40993
17631398			0.000157857	3.78294
17872173			0.000158477	1.70688
17823958			0.00015875	-1.86012
17744395			0.000158868	1.6814
17876460			0.000160006	2.04928
17679271			0.000163176	2.93067
17846765			0.000163805	1.89439
17748494			0.000163953	1.85926
17707884			0.000164876	1.72888
17626430			0.000167787	1.49186
17813015			0.000171341	3.62793
17778628			0.000173165	1.70283
17877071			0.000174979	2.00723
17712038			0.00017702	2.14191
17782247			0.000177987	-1.31989
17784702			0.00017845	1.39745
17726649			0.000183036	3.36958
17856210			0.000192772	1.60374
17644086			0.000201264	2.53908
17881841			0.000202365	1.84283
17728171			0.000202586	1.55085
17824090			0.000204217	-1.84338
17683500			0.000204841	2.1401
17628292			0.000204979	1.92875
17821714			0.000213854	2.0718
17664138			0.00021685	1.80979
17825532			0.000220441	1.70531
17850316			0.000223916	3.58123
17874794			0.000230988	-1.89472
17660784			0.000231902	2.14885
17650519			0.000232394	4.55882
17661411			0.000232706	-1.35989
17626435			0.000232748	3.09843
17678896			0.000233023	2.70005
17765048			0.000243542	2.83069
17874240			0.000245088	1.73482
17806997			0.000248741	2.0507
17807493			0.000249191	3.55506
17870064			0.00025044	1.56373
17878832			0.0002559	1.79452
17678330			0.000257003	2.28642
17674342			0.000260456	2.94723
17686243			0.000261361	2.05573
17795302			0.000261776	2.08874
17768072			0.000261897	1.71714
17859156			0.000264777	1.82901
17716183			0.000272613	-1.51076
17664276			0.000274112	1.52962
17863056			0.000275023	1.87803
17699934			0.000283325	-1.56853
17649426			0.000285716	-1.85751
17615105			0.000287547	1.80473
17611955			0.000293073	-1.64777
17800567			0.000300495	1.32779
17727641			0.000302089	2.45849
17815774			0.000304246	1.43316
17781186			0.000306586	1.56924
17828842			0.000308864	1.88863
17685176			0.000308915	-1.59831
17696070			0.000309185	2.27406
17821605			0.000309536	1.64599
17783793			0.0003106	-1.48997
17682439			0.000318708	1.71623
17861997			0.000319547	2.47845
17831227			0.000322701	-3.62456
17635616			0.000323085	-2.47808
17678889			0.000325478	-1.52926
17680182			0.000325574	2.2952
17685880			0.000325746	1.45109
17632006			0.00033118	-1.48425
17773850			0.000333563	1.7786
17610647			0.000333844	5.19777
17787924			0.00033533	2.24851
17799065			0.00034132	-1.69226
17748839			0.000349072	1.61005
17730619			0.000349095	1.5995
17650526			0.000353602	2.99477
17714914			0.00035636	4.22936
17882655			0.000357811	1.60473
17658050			0.000365286	1.55656
17636391			0.000366373	1.67845
17689862			0.000368143	1.44263
17677593			0.000370311	1.35357
17708314			0.000371204	-1.62594
17820393			0.000373714	1.57804
17855158			0.000380093	1.3724
17841953			0.000380839	2.09642
17865725			0.000392288	1.38035
17682418			0.000394439	2.32755
17651087			0.000397814	-1.79888
17701689			0.000397843	-1.56295
17746038			0.000397905	-1.43533
17799179			0.000404244	1.62469
17655129			0.00041031	-1.52126
17853933			0.000422923	2.21471
17787848			0.000424681	-1.28013
17751762			0.000426103	-2.30323
17735224			0.000426146	-1.9022
17641421			0.000426193	2.11662
17838717			0.000429501	-1.53345
17832121			0.000429856	1.88366
17855446			0.000434762	2.08297
17687351			0.000436461	-2.41336
17648607			0.000439019	1.26204
17656277			0.000441897	-2.94866
17831371			0.000443655	1.36077
17650425			0.000448871	1.55592
17680024			0.000450458	1.87702
17801689			0.000452037	1.50613
17679482			0.000453296	-1.78954
17620634			0.00045516	1.62206
17744496			0.000456048	2.82062
17745428			0.0004605	1.9193
17878811			0.000461476	1.70291
17798263			0.000462549	1.70037
17668877			0.00046289	-1.39659
17626800			0.00047269	-1.72602
17700024			0.000474545	-1.42163
17734029			0.000475553	-1.82041
17632379			0.000480645	1.61897
17781795			0.000484085	-1.82477
17768360			0.000486854	4.57707
17714452			0.000487513	1.36548
17654204			0.0004928	1.46066
17631853			0.000497592	1.71595
17734753			0.000497626	-1.39185
17809353			0.000505956	2.04627
17721159			0.000512439	-1.93084
17812584			0.000513588	1.63953
17764218			0.000514573	1.83344
17672650			0.000520841	1.45065
17796627			0.000521558	1.44787
17762239			0.000528412	2.63898
17684362			0.000528729	1.36264
17660782			0.000532997	2.21647
17740082			0.000542319	1.38413
17847159			0.000547314	-1.30436
17805817			0.000551879	1.73651
17617588			0.000553046	2.48632
17814680			0.000553672	1.79496
17630813			0.000554645	1.47379
17872847			0.000567933	1.80644
17630822			0.00057151	1.99174
17797345			0.000573739	1.48213
17785906			0.000585437	-1.55274
17724561			0.000595873	-1.52476
17769925			0.000597608	2.49085
17735360			0.000598897	1.65399
17736456			0.000604754	-2.2904
17768032			0.000607485	-1.81098
17874195			0.000610834	6.76713
17680410			0.000612523	1.5717
17783542			0.000612551	-1.77279
17817269			0.000613916	2.76796
17725180			0.000614032	1.89212
17756611			0.000615345	-1.84458
17643674			0.000615721	-1.51654
17881483			0.000616814	-1.36244
17748270			0.000619261	1.95417
17670019			0.00062011	1.77919
17821123			0.000620992	1.49009
17713606			0.000622071	2.2393
17729144			0.000626622	1.44813
17618563			0.000629361	-1.37543
17715413			0.000635751	1.53816
17749703			0.000638221	1.81258
17715646			0.000644184	1.33229
17877868			0.000651607	1.96428
17695172			0.000656935	-1.71149
17676574			0.000661135	1.97978
17839326			0.000662339	-1.39842
17690414			0.00066511	-1.91356
17667492			0.00067413	1.56151
17751427			0.000680189	-1.34634
17814795			0.000683829	-1.91218
17740786			0.000687915	1.65607
17866937			0.000689369	1.4601
17673587			0.000694921	2.14948
17674882			0.000701767	1.55359
17725732			0.000702332	1.53397
17720566			0.000712028	-1.33165
17882101			0.000717435	1.73983
17725090			0.000720085	5.43216
17681883			0.000721938	2.58143
17702506			0.000728577	-1.39458
17803080			0.000729465	1.33942
17671142			0.000736518	-1.82921
17662478			0.000740472	-1.63712
17781647			0.000742091	-1.74895
17851745			0.000744086	1.39768
17705450			0.000753001	1.55175
17719794			0.000754536	1.37458
17734078			0.000763811	1.6596
17877237			0.000768006	4.87101
17751818			0.00077032	1.45376
17681887			0.000774568	3.50961
17813311			0.000776036	1.48306
17625347			0.000777766	-1.95079
17626338			0.000780126	-1.47507
17701616			0.000785225	1.73113
17708535			0.000785657	-1.40113
17807789			0.000786386	4.94942
17663090			0.000796068	-1.57547
17806954			0.000797513	2.20234
17774906			0.000802925	-1.37732
17842633			0.000804792	1.67597
17847648			0.000806232	1.73945
17607091			0.000811036	1.88374
17602465			0.000812545	-2.04108
17755996			0.000817056	-1.76907
17634541			0.000818776	-1.79181
17816556			0.000824701	-1.4212
17657219			0.000825135	2.61351
17681884			0.000829239	3.49116
17846309			0.000829491	-1.65349
17838812			0.000834898	1.67268
17767383			0.000836611	2.05837
17841780			0.000838117	-1.68495
17742680			0.000843374	2.51742
17685342			0.000856892	1.29932
17636372			0.000859385	1.34571
17800600			0.000865581	1.42046
17736437			0.000869405	-1.8122
17808407			0.000870199	1.74437
17672910			0.00087443	-1.71395
17619844			0.000876903	-1.86046
17768369			0.000898276	2.02723
17882669			0.000905229	1.4612
17876808			0.000907583	1.77956
17879447			0.000911709	-1.53592
17798181			0.000914969	1.83341
17870022			0.000922153	3.30859
17876747			0.00092481	2.04021
17712236			0.000927671	-1.72542
17745568			0.000927789	-1.75891
17822845			0.00092818	-1.92832
17769562			0.000935282	1.68853
17855551			0.000935537	1.95975
17877593			0.000936237	4.55631
17729259			0.000938072	1.94276
17634190			0.000938569	-1.65001
17626422			0.000941846	1.43227
17792280			0.000951695	1.83062
17826282			0.000962916	-1.639
17789921			0.000964035	-1.55714
17823874			0.000968431	2.33125
17658904			0.000973739	2.26416
17678888			0.00097982	-1.46915
17806244			0.000980988	2.70983
17846579			0.000984347	1.71761
17858512			0.000990103	1.8447
17765453			0.00099202	1.51572
17836459			0.000992654	1.60018
17665083			0.000996048	-1.53459
17781773			0.00100438	1.27996
17770307			0.00100592	1.78048
17703389			0.00100931	1.52421
17615791			0.0010152	-1.41638
17645125			0.00102163	-1.26104
17645990			0.00102367	2.44206
17649432			0.00102757	-1.60341
17724563			0.00103559	-2.01611
17678892			0.00104293	-1.57686
17715174			0.00104798	-1.35888
17813143			0.00105761	2.12677
17653485			0.0010581	1.33491
17726340			0.00106132	-1.45479
17825654			0.00106505	-1.74992
17834031			0.0010779	1.50427
17788161			0.00108026	1.24824
17625860			0.00108556	5.55864
17880297			0.00108666	1.25954
17784469			0.00110112	-1.56883
17618664			0.00110442	5.13772
17758615			0.00110667	-1.47565
17720568			0.00111357	-1.31221
17873325			0.0011152	-1.47252
17736958			0.00113928	-1.53691
17739321			0.00114063	1.75003
17728713			0.00114139	-1.36584
17856974			0.00114231	1.6562
17813867			0.00114542	-1.75435
17664967			0.00114641	5.69445
17720559			0.00114901	-1.26245
17830213			0.00116815	1.94638
17611170			0.00117205	2.08316
17693840			0.00118211	1.49919
17789873			0.00118897	1.8705
17689536			0.00119513	1.56515
17827483			0.00119514	1.46031
17811162			0.00120516	2.2116
17697484			0.00120776	-1.22438
17807852			0.00120961	5.22784
17602613			0.00120989	-2.04661
17693015			0.00121989	-2.23002
17761597			0.00122272	1.7029
17788072			0.00122335	1.52862
17846122			0.00122864	2.86034
17817508			0.00122996	-2.01743
17873560			0.00123095	1.26232
17882119			0.00123492	-1.37875
17761124			0.00123555	-1.40167
17880671			0.0012364	-1.68948
17723879			0.00125296	2.09151
17644080			0.00125979	1.3482
17872268			0.00126723	-1.51132
17703888			0.00127093	-1.68929
17844873			0.00127215	-1.35205
17850927			0.00128807	2.88694
17842119			0.00129363	-1.42681
17842146			0.00130726	-1.529
17618047			0.00131409	1.31461
17797894			0.0013152	1.87727
17802242			0.00131935	1.46014
17753995			0.00132051	1.44769
17687556			0.00132439	1.58741
17706828			0.00132789	-1.33244
17797143			0.00133601	1.40958
17616697			0.00133719	-1.92121
17810097			0.00133956	-1.19001
17683183			0.00133972	1.6089
17663195			0.00134137	-1.38165
17832266			0.0013449	-1.58718
17700845			0.00134689	-1.47987
17734874			0.0013519	1.48571
17760049			0.00135983	20.9413
17690288			0.00135987	1.4069
17716664			0.00136667	3.36412
17743424			0.00137248	-1.32008
17612006			0.00137949	1.46881
17802044			0.00139017	1.77889
17635411			0.00139629	7.72843
17618808			0.00139894	4.9821
17773987			0.00140486	1.45972
17664730			0.00140631	1.92433
17810944			0.00142303	1.64393
17799844			0.0014239	-1.67854
17692413			0.00142798	-1.69226
17695484			0.00143043	-1.96578
17681943			0.00143108	2.67164
17798789			0.00143196	-2.43194
17747780			0.00144491	1.24129
17747721			0.00145506	1.33221
17881767			0.00146717	3.12219
17622829			0.00147262	1.47724
17850921			0.0014738	1.44646
17691617			0.00147437	1.61428
17781257			0.0014868	-1.7384
17682854			0.00148995	1.67874
17633258			0.00149328	1.48208
17754471			0.00150183	-1.32707
17877111			0.00150795	1.41726
17789396			0.00151028	-1.94558
17827193			0.00151546	-1.7473
17709399			0.0015194	-1.84971
17712330			0.00152038	-3.5179
17636393			0.00152113	1.80079
17731895			0.00152339	1.91616
17842978			0.00152818	1.23112
17674897			0.00153166	-1.94612
17878822			0.00153889	1.78433
17837791			0.00154122	1.90894
17756825			0.0015519	1.8579
17820050			0.00155263	1.40057
17821652			0.00156658	-1.24272
17808333			0.00157421	-1.52203
17764328			0.00157575	-1.78713
17831240			0.00157867	-1.33745
17716004			0.00157903	-1.40863
17765978			0.00158265	-1.3308
17686721			0.00159012	1.39749
17681736			0.00159726	-1.95787
17618739			0.0015979	-1.94391
17777980			0.00160188	-1.57712
17746731			0.0016019	1.24602
17761221			0.00161818	3.29541
17643547			0.00161879	1.69052
17724903			0.00162183	-1.30826
17688985			0.00163727	4.28515
17640331			0.00163798	-1.92041
17715035			0.00163943	-1.54643
17783840			0.00164493	1.54135
17801203			0.00164512	1.48369
17853673			0.00165098	2.43371
17690744			0.00165649	1.34439
17622032			0.00166214	1.72545
17829965			0.00166365	1.78061
17876054			0.00166508	-2.02975
17821425			0.00166598	-1.62535
17610530			0.00166753	-1.65692
17795265			0.00167143	5.15726
17719081			0.00167869	-1.57079
17815172			0.00168126	1.51
17708677			0.00168445	1.74488
17708855			0.00169502	-1.40243
17829646			0.00169836	2.46969
17650549			0.0017	1.56367
17787979			0.00171	-1.50452
17878496			0.00171013	1.47395
17664001			0.0017232	1.30132
17828067			0.0017253	1.96135
17817115			0.00172578	-1.65277
17806014			0.00173155	-1.55763
17789901			0.001738	1.72746
17735298			0.00174972	1.6064
17733277			0.00175556	2.3877
17786274			0.00176418	-1.9487
17690315			0.00176838	-1.49314
17733052			0.00178666	-1.47902
17665394			0.00178735	2.01707
17856227			0.0018097	1.57334
17667134			0.0018196	1.58101
17844002			0.00182962	2.18151
17672845			0.00183104	-1.44603
17833113			0.00185043	1.82541
17642859			0.0018526	1.30099
17873924			0.00186422	1.63144
17757316			0.00186561	1.2449
17780018			0.00186924	1.52097
17718650			0.00187071	1.96361
17755038			0.00187197	-1.49521
17611421			0.00187691	3.89333
17875904			0.00187704	-1.47349
17810115			0.00187805	-1.4361
17665078			0.00189216	-1.5089
17867621			0.00189684	3.12246
17636394			0.0018969	1.54579
17628646			0.0018976	1.43715
17875481			0.00190006	-1.54819
17850098			0.00190168	-2.04151
17823370			0.00190688	1.53034
17634317			0.00190911	-1.33906
17712885			0.00191474	1.34254
17610541			0.00192046	1.74499
17704504			0.00192638	1.40403
17752327			0.00195354	1.79144
17843000			0.00196734	1.3515
17799332			0.00196786	2.75645
17728603			0.00198749	1.38684
17807773			0.00198809	5.1197
17726556			0.0019896	1.69613
17867985			0.00202228	-1.83298
17799134			0.00202248	-1.38607
17724816			0.00203175	1.59529
17840184			0.0020336	-1.87357
17829386			0.00203738	1.72771
17751772			0.00204731	-1.56401
17861066			0.00205158	-1.49643
17837674			0.00206004	2.49388
17871047			0.00206315	1.55705
17757902			0.00206435	-1.59792
17731360			0.00206979	-1.57469
17749627			0.00207093	-1.33855
17837405			0.00207485	-1.88181
17867946			0.00208042	1.49118
17834858			0.00209061	-1.33697
17853827			0.00209676	1.50731
17796593			0.00210068	1.47894
17648980			0.00211537	1.72843
17783565			0.00211897	1.60151
17770717			0.00211974	-2.15571
17676317			0.00211998	-1.81523
17643153			0.00212525	2.25515
17817515			0.00213803	-1.40672
17810223			0.00213972	1.59239
17634459			0.00214529	1.34883
17785849			0.00214544	3.0368
17742468			0.00214611	1.83702
17829493			0.00214844	1.44764
17883003			0.00214844	1.44764
17801184			0.00215064	1.82858
17792557			0.00217891	1.53364
17839047			0.00218949	-1.74807
17703587			0.00219385	-2.25553
17828512			0.00221211	2.27374
17626842			0.00221251	2.1796
17622657			0.00221453	-1.40832
17708508			0.00221732	-1.35374
17707610			0.00221797	1.97218
17845803			0.00221884	1.33669
17757895			0.00223379	1.50966
17773124			0.00223507	-1.46275
17871609			0.00224796	1.41911
17641304			0.00226712	3.46055
17656253			0.0022714	-1.88814
17759923			0.00227591	-1.46118
17879773			0.0022837	1.3648
17747502			0.00228385	-1.50613
17720030			0.00228922	-1.59758
17723983			0.00229038	-1.85048
17688898			0.00229069	-1.83172
17835237			0.00229411	-1.47225
17712004			0.00231453	-1.65031
17849254			0.00231565	2.18928
17624770			0.00232523	1.78378
17882731			0.00232999	-1.40052
17729126			0.00233196	2.18638
17827188			0.002332	1.7027
17754941			0.00233305	2.00325
17675170			0.0023387	-2.17013
17649792			0.0023405	-1.78264
17686902			0.00235777	-2.21622
17856785			0.0023716	-1.81326
17849251			0.00237716	1.81804
17761729			0.00237908	-1.25796
17800346			0.00238114	-1.29898
17709074			0.00238327	-1.38355
17687960			0.00239242	-1.57181
17693364			0.00240073	-2.0672
17769336			0.00240319	-1.98234
17623498			0.0024073	-1.34543
17832016			0.00240869	1.56419
17708927			0.00241085	1.41871
17814329			0.00241844	1.40029
17866187			0.00242795	1.63409
17688828			0.00245737	-1.43914
17656675			0.00245984	1.35942
17756409			0.00247126	-1.30232
17857622			0.00249421	1.84152
17817427			0.00249689	1.36893
17850167			0.0025139	1.31071
17686599			0.00252712	-1.27202
17693820			0.00253785	1.68185
17621742			0.00254657	1.6496
17687364			0.00255711	-1.96118
17670072			0.002562	1.27703
17793478			0.00256421	1.51658
17822421			0.00256471	-1.39789
17625293			0.00256608	-1.39054

## Sheet: TableS5c
Column ID	p-value(SHR * LIVER * CTL vs. PLZF * LIVER * CTL)	Fold-Change( PLZF * LIVER * CTL vs. SHR * LIVER * CTL)	p-value(SHR * LIVER * PROG vs. PLZF * LIVER * PROG)	Fold-Change(PLZF * LIVER * PROG vs SHR * LIVER * PROG)
17619096			2.26857e-08	-1.54611
17705599			6.43827e-08	-2.73601
17736956			4.20465e-07	-1.61292
17705177			9.53733e-07	-1.4661
17774126			1.14774e-06	-1.45475
17716254			1.45012e-06	1.34393
17628738			1.67121e-06	-2.9921
17605979			1.89997e-06	-2.4131
17667519			2.8919e-06	-1.36395
17688096			2.90642e-06	2.95674
17607037			3.39521e-06	-2.01943
17764385			3.41987e-06	1.66679
17606729			4.19176e-06	-1.99256
17758909			4.52476e-06	-2.15769
17612141			4.79029e-06	-1.30949
17868415			5.28291e-06	-2.21266
17612223			6.52119e-06	-2.24896
17608101			7.8974e-06	-1.57713
17608015			8.62362e-06	-2.20594
17721266			1.02814e-05	-1.61013
17728574			1.16326e-05	1.38672
17805665			1.18582e-05	2.41314
17733042			1.30043e-05	-1.64176
17754056			1.36134e-05	1.34374
17805286			1.37498e-05	1.48451
17774354			1.61798e-05	-1.28078
17815607			1.63791e-05	2.01257
17726592			1.74369e-05	1.9794
17698259			1.95849e-05	-1.32566
17702396			1.95849e-05	-1.32566
17824776			2.03351e-05	-2.12734
17753099			2.11791e-05	-2.064
17738567	4.70048e-05	-1.42724	2.60302e-05	-1.44881
17843083			2.65395e-05	1.43444
17713615			2.93753e-05	1.89139
17718999			2.94789e-05	-1.44517
17869946			3.53686e-05	-1.58119
17824734			3.57264e-05	-1.38027
17688874			3.68771e-05	5.24819
17610371			4.08532e-05	-1.61543
17666026			4.0859e-05	-1.36795
17633497			4.18534e-05	-1.91081
17601905			4.24821e-05	-2.45238
17624187			4.30383e-05	1.41065
17868451			4.37908e-05	-5.83661
17604957			4.49403e-05	1.77701
17810049			4.62866e-05	-1.57458
17696863			4.71372e-05	-3.18202
17758905			4.80805e-05	-3.18082
17834371			5.33624e-05	-1.78521
17827034			5.69145e-05	-1.33041
17609791			5.72582e-05	1.98841
17808518			5.78028e-05	1.52586
17637892			5.9755e-05	-1.64469
17601595			6.02087e-05	1.83225
17854827			6.05059e-05	1.77392
17774256			6.32018e-05	-1.35275
17850782			6.34446e-05	-1.402
17726227			6.49916e-05	1.45542
17609667			6.81379e-05	-2.56881
17617192			7.29001e-05	-1.76286
17642790			7.49669e-05	-1.24623
17841724			7.49669e-05	-1.24623
17632258			7.71644e-05	-1.41277
17874629			7.78092e-05	-1.54198
17851299			7.9307e-05	-1.52046
17634600			8.32722e-05	-1.29388
17689029			8.66081e-05	1.89606
17851319			8.73851e-05	-1.59596
17631751			8.74182e-05	-1.4426
17723832			8.936e-05	1.45595
17816821			8.96695e-05	1.60239
17739125			9.21907e-05	1.59373
17881107			9.49948e-05	-1.57582
17690470			9.61253e-05	1.48557
17697240			0.000100472	-2.0347
17602057			0.00010397	2.173
17605753			0.000106142	-2.16385
17722670			0.000107734	-1.45832
17832280			0.000109034	-1.46309
17636654			0.00011149	1.51007
17633521			0.000114188	-2.27228
17703786			0.000115439	1.66239
17818007			0.000116389	1.51579
17619122			0.000117647	-1.78993
17602059			0.000119069	-1.86892
17845801			0.000122372	-1.54368
17604133			0.000125424	-2.91648
17619106			0.000129489	-1.45778
17636967			0.000132079	1.38398
17879593			0.000140201	-1.31424
17688117			0.000140647	-2.8896
17723391			0.000143466	1.52329
17882309			0.000146032	1.57009
17738024			0.000150087	1.48724
17832363			0.000150661	-2.75139
17882423			0.00015121	-1.38113
17808498			0.000151818	-1.66686
17629813			0.00015639	-1.23561
17867527			0.000163307	-2.36824
17603391			0.000166302	-1.4491
17834196			0.000172523	1.43589
17715786			0.000175922	1.48933
17600635			0.00017688	-2.0648
17610149			0.00017688	-2.0648
17656469			0.000177853	-1.79717
17606053			0.000182254	-2.86983
17801556			0.000183073	-1.38555
17601027			0.000185188	-2.39114
17601361			0.000185188	-2.39114
17734724			0.000186385	-2.00685
17825878			0.000188212	-1.44036
17635567			0.000188777	-1.5035
17818701			0.000191978	1.25988
17640885			0.000192433	1.78034
17602123			0.000196942	-2.11066
17851230			0.000197728	-1.80066
17812297			0.000199796	-1.54805
17602509			0.00020244	-2.05341
17605521			0.000203188	-2.98904
17791267			0.000207651	1.58481
17868292			0.000208741	-2.39896
17699263			0.000211752	2.34755
17649444			0.000211937	-1.29676
17607055			0.000213272	-2.01886
17867524			0.00021389	-1.68198
17645916			0.000215955	1.37564
17603717			0.000220212	-2.08673
17765937			0.000220518	-1.29409
17859270			0.000221978	1.72002
17653485			0.00022511	1.3944
17869670			0.000230236	-1.43561
17611168			0.000230894	1.51874
17734564			0.00023454	1.48011
17717971			0.000235708	-1.88485
17833260			0.000238652	-1.38875
17700462			0.000247762	1.45653
17869491			0.000251021	-2.37289
17697489			0.000252767	-1.36205
17632818			0.000255302	1.48876
17803896	2.20603e-06	2.07233	0.000259906	1.69006
17616723			0.000264842	-1.45973
17620596			0.000265878	1.446
17635742			0.000267702	-2.20264
17651161			0.000267842	-1.35358
17636393			0.000268423	1.99849
17850301			0.000269498	-2.73502
17610368			0.000270549	-1.52835
17824809			0.000273321	-1.97875
17857535			0.000274855	1.71403
17608197			0.000279281	4.02657
17605365			0.00028542	-2.33672
17647093			0.000286514	-1.42842
17695704			0.000287073	1.62899
17755786			0.000294324	1.3606
17850072			0.000295244	1.63902
17874137			0.000297891	1.23428
17635546			0.000298686	-1.38622
17766820			0.000300082	1.69594
17603693			0.000302881	-3.03441
17636808			0.00030362	-1.21607
17609601			0.000306442	2.07139
17866490			0.000309465	1.55436
17704552			0.000310519	1.35864
17617512			0.000312882	-1.49878
17822671			0.000315955	-1.47295
17716543			0.000320556	-1.40728
17663169			0.000321265	-1.67347
17778487			0.000321631	1.51542
17612647			0.000323584	-1.38359
17716193			0.000323587	-1.32654
17824961			0.000329965	1.2303
17763642			0.000331288	-1.26206
17605923			0.000332571	-2.03908
17821987			0.000337621	-2.17544
17829203			0.000339225	-1.37748
17853556			0.000341649	1.32789
17640797			0.000341757	-1.35591
17628832			0.000342179	1.6015
17620520			0.000343876	1.48745
17826856			0.000344992	1.62883
17687455			0.000353907	-1.66898
17617196			0.00035596	-5.01408
17617198			0.00035596	-5.01408
17633479			0.00035596	-5.01408
17633499			0.00035596	-5.01408
17633503			0.00035596	-5.01408
17633505			0.00035596	-5.01408
17633509			0.00035596	-5.01408
17633511			0.00035596	-5.01408
17633515			0.00035596	-5.01408
17633523			0.00035596	-5.01408
17761853			0.000356423	2.75582
17812755			0.000357134	-1.24791
17604069			0.000358792	-2.0264
17700416			0.000359755	-1.34507
17639144			0.000371757	-1.40419
17882633			0.000374086	-1.41265
17606859			0.000375609	-1.73128
17693483			0.000379285	-1.28049
17633565			0.00038343	-4.48759
17633569			0.00038343	-4.48759
17786212			0.000395585	-1.21336
17633467			0.000396167	-3.04758
17666113			0.000398174	-1.53414
17701205			0.000399342	-2.39551
17761959			0.000400761	-1.2453
17868331			0.000402538	-2.38579
17753402			0.000405391	-1.33778
17790578			0.000407048	-1.40223
17632341			0.000408512	-1.89144
17868246			0.000410369	-1.60017
17789919			0.000410776	-1.27856
17757367			0.000411464	1.73382
17883149			0.000420891	-1.58828
17633481			0.00042195	-3.83765
17747493			0.000429423	1.36826
17704592			0.000439763	1.32417
17609761			0.000440113	1.83343
17635914			0.000443513	-1.59307
17818127			0.000445943	-1.33262
17633519			0.000456995	-2.63526
17739024			0.000457149	-1.31735
17799775			0.000458968	-1.2741
17644720			0.000470186	-1.52142
17666909			0.000475225	-1.30464
17778225			0.00047764	1.39061
17851373			0.000485545	-1.41426
17628681			0.00048966	-1.2757
17797713			0.000493232	1.567
17792083			0.000503272	1.34881
17868954			0.000503385	-4.55184
17628793			0.000504686	-2.05836
17879733			0.000523431	-1.42404
17869413			0.000524794	-1.56989
17755171			0.000532076	1.45838
17696592			0.000538636	1.57718
17715898			0.000541521	-1.37177
17868088			0.000542422	-2.10132
17645328			0.00054983	-1.35744
17648348			0.000555508	-1.37617
17840257			0.000556722	-1.57624
17851148			0.000557092	-1.2584
17764604			0.000558979	-1.48456
17671669			0.00056563	1.73824
17607075			0.000574077	1.62161
17818571			0.000583677	-2.48872
17612171			0.0005864	-1.88614
17633507			0.000587971	-3.93912
17606175			0.000593727	1.88754
17716335			0.000596324	-1.45714
17627906			0.000600473	-1.34222
17828539			0.000621718	-1.28274
17608819			0.000623818	-1.72729
17869664			0.00062553	-1.43317
17702481			0.000626129	-1.26143
17833553			0.000628398	-1.28835
17663158			0.000640332	1.8097
17868190			0.000646711	-2.80936
17781965			0.000665279	-1.2649
17882463			0.000665763	1.66902
17692722			0.000667074	-2.10631
17843373			0.000668728	-1.8449
17834922			0.000668847	-1.57694
17821315			0.000669825	1.44327
17697415			0.000697496	-2.1289
17608129			0.000699239	1.69497
17688703			0.000699477	1.47554
17720423	1.15017e-06	-4.22683
17784218	1.24878e-06	-1.86828
17744784	1.6551e-06	-1.72558
17703644	3.90388e-06	1.55618
17809577	4.5382e-06	1.80498
17614994	4.56479e-06	1.74005
17781286	6.2751e-06	-2.58629
17834093	7.84197e-06	-1.36307
17719497	7.84865e-06	-1.54209
17870945	9.21065e-06	1.5384
17811098	1.69677e-05	3.2451
17601921	1.88749e-05	-2.0871
17786706	1.94892e-05	2.5269
17666565	2.04584e-05	5.02807
17740143	2.06619e-05	-1.95354
17693069	2.19268e-05	-1.7125
17748801	2.89546e-05	-2.30814
17627369	3.46966e-05	2.01243
17653172	3.5452e-05	1.58495
17716694	3.61135e-05	-1.6969
17883550	3.98509e-05	-2.06983
17717736	6.28664e-05	-1.57145
17815429	6.38981e-05	-1.37498

## Sheet: TableS5d
Column ID	p-value(PLZF * BAT * CTL vs. PLZF * BAT * PROG)	Fold-Change(PLZF * BAT * PROG vs. PLZF * BAT * CTL)	p-value(SHR * BAT * CTL vs. SHR * BAT * PROG)	Fold-Change(SHR * BAT * PROG vs. SHR * BAT * CTL)
17638205	1.47438e-16	3.06528	3.72541e-10	1.93581
17646715	2.52158e-15	13.3105	1.28838e-12	8.03864
17805604	5.75238e-13	11.7349	2.40816e-10	7.08249
17753249	9.31163e-12	1.93954	1.56267e-11	1.91472
17674934	1.41644e-11	6.03785	6.55243e-09	4.04767
17674936	1.41644e-11	6.03785	6.55243e-09	4.04767
17674938	1.41644e-11	6.03785	6.55243e-09	4.04767
17882811	1.41644e-11	6.03785	6.55243e-09	4.04767
17882813	1.41644e-11	6.03785	6.55243e-09	4.04767
17882815	1.41644e-11	6.03785	6.55243e-09	4.04767
17644254	2.61699e-11	5.09169	4.38026e-09	3.73992
17769015	3.71585e-11	5.39626	3.61208e-09	4.04135
17859651	3.86845e-11	11.2269	3.5452e-09	7.4507
17760349	5.27786e-11	3.39529	6.63107e-08	2.45433
17619502	7.30138e-11	10.7758	6.85274e-10	8.76807
17782065	8.70389e-11	1.95865	7.5182e-09	1.7462
17674965	1.46736e-10	9.84072	4.72827e-08	5.91603
17611071	2.22544e-10	9.33696	5.94922e-09	6.98375
17882823	2.30393e-10	10.8512	1.33451e-07	6.01384
17789082	2.33661e-10	14.3895	3.2572e-08	8.58611
17752111	2.33723e-10	3.4375	8.37683e-09	2.8864
17725568	2.36862e-10	5.58621	1.32193e-09	4.96223
17632723	2.8085e-10	3.80551	9.62564e-08	2.80206
17818965	2.81511e-10	8.8016	2.75217e-10	8.81925
17722610	4.0334e-10	7.86713	2.05443e-06	3.94213
17847298	4.4937e-10	2.5373	2.07794e-10	2.614
17632725	5.31096e-10	2.58223	4.18978e-07	2.00663
17768109	5.46464e-10	3.82454	4.59749e-08	3.00952
17647364	9.35738e-10	18.9629	0.000500827	3.94485
17752880	1.01704e-09	10.4876	1.26509e-08	8.20161
17883201	1.0995e-09	3.78335	4.81901e-06	2.4046
17678894	1.84963e-09	2.49423	1.24476e-06	1.94763
17667792	2.3719e-09	1.73278	1.55319e-07	1.57231
17627179	2.57106e-09	3.06853	4.77435e-05	1.9337
17746200	3.06903e-09	7.20881	8.20836e-07	4.51259
17709862	3.25611e-09	4.24408	7.68671e-07	3.03298
17796931	4.14633e-09	3.35977	9.20194e-09	3.2206
17752113	5.46922e-09	6.3003	9.97456e-07	4.15746
17760013	6.08208e-09	1.72621	2.46177e-06	1.49698
17792333	6.61097e-09	3.84604	0.000369267	2.0191
17670118	6.77165e-09	8.12237	3.39574e-08	6.9931
17830938	6.99284e-09	-3.01436	7.5938e-07	-2.40274
17752878	7.66195e-09	4.41316	5.3199e-06	2.88306
17760347	7.92313e-09	6.40107	2.4724e-08	5.82461
17648904	8.30997e-09	4.89271	3.42069e-06	3.21278
17681329	9.01107e-09	3.05288	2.71474e-06	2.30413
17881120	1.00455e-08	1.95298	1.7398e-10	2.21566
17684462	1.35814e-08	5.0998	1.99801e-05	2.99226
17883209	1.48929e-08	8.6737	3.22272e-06	5.13698
17783185	1.64829e-08	6.74626	2.59997e-06	4.35482
17676879	1.89208e-08	2.03295	2.17903e-06	1.74364
17771126	1.90328e-08	2.90036	8.46972e-06	2.15802
17767946	1.97471e-08	2.27863	3.65612e-10	2.66351
17623679	2.10503e-08	3.85332	2.76476e-06	2.85114
17874930	2.61397e-08	3.36421	3.61345e-07	2.90166
17843480	2.81173e-08	-2.17907
17700898	3.08155e-08	-1.65829	5.79392e-05	-1.38843
17766252	3.41562e-08	6.11593	1.54462e-07	5.37745
17670381	3.41918e-08	2.25554	4.1715e-05	1.72121
17740089	3.55977e-08	2.2195	7.94567e-05	1.66335
17879483	3.65983e-08	5.84609	3.19203e-06	4.03804
17861862	4.35409e-08	8.15873	5.20661e-07	6.37316
17660657	4.65108e-08	5.34285	4.2851e-06	3.73052
17828153	5.15277e-08	6.10438	9.28589e-05	3.1943
17871861	5.17345e-08	-2.31104	2.60848e-05	-1.80282
17792222	7.70274e-08	3.71733	0.000171683	2.26861
17809654	8.02244e-08	3.1312	3.28922e-07	2.89451
17778749	8.04466e-08	2.16006
17827692	8.44709e-08	2.15496	0.000100598	1.65173
17695867	8.77974e-08	11.3376	4.67274e-05	5.38106
17671751	9.6562e-08	2.25347	1.28171e-06	2.03269
17760345	9.99414e-08	5.30545	3.75876e-06	3.94129
17681327	1.04503e-07	5.05049	4.13344e-06	3.76752
17700321	1.05095e-07	-1.50643
17734805	1.05457e-07	5.11646	0.000256472	2.7202
17606315	1.0887e-07	-2.23238	9.4751e-06	-1.87056
17770806	1.09105e-07	-1.88537
17683592	1.13205e-07	3.83231	3.10747e-05	2.63891
17631196	1.29046e-07	1.38884	6.95078e-06	1.30133
17799940	1.30981e-07	8.08834	0.000124929	3.94776
17683509	1.34701e-07	3.00851	1.15227e-06	2.67393
17725566	1.39139e-07	-2.32999	2.80604e-08	-2.49487
17727681	1.42543e-07	6.49872	4.99049e-06	4.66108
17801861	1.43044e-07	5.50435	5.11358e-07	4.93678
17716119	1.51079e-07	2.69604	1.23802e-07	2.72302
17652947	1.53388e-07	5.02564	1.81636e-06	4.1141
17611549	1.64077e-07	2.50336	5.62158e-05	1.91067
17877625	1.83562e-07	-1.36667
17880835	1.9805e-07	1.91438	2.26557e-09	2.22601
17858443	2.02125e-07	1.97324	1.28915e-05	1.70934
17788948	2.32834e-07	-2.37892	1.44239e-06	-2.194
17701826	2.34193e-07	3.15669	0.00109515	1.90061
17743771	2.58161e-07	4.99372	0.000243389	2.81802
17657791	2.81541e-07	2.50659	2.27756e-06	2.26975
17673512	2.83215e-07	2.67271	0.000162328	1.93064
17632708	3.03035e-07	2.27334	3.68561e-06	2.04392
17850167	3.25017e-07	1.68258	3.66247e-06	1.57578
17748424	3.2767e-07	5.23543	2.0465e-05	3.66426
17856249	3.38253e-07	2.12395	0.000773793	1.55858
17706882	3.46105e-07	1.45892
17792663	3.51044e-07	1.65076	1.72971e-07	1.68177
17678888	3.56712e-07	1.94701	2.94015e-06	1.80907
17648894	4.20057e-07	2.86694	1.41618e-06	2.67976
17769171	4.29409e-07	2.88501	0.000236351	2.01918
17719511	4.64721e-07	2.20954	9.37226e-12	3.57249
17846140	4.89639e-07	3.78429	9.27594e-05	2.60514
17809650	5.0131e-07	4.10225	4.22332e-05	2.93662
17757587	5.11308e-07	-2.07971	9.29617e-06	-1.85713
17711878	5.27765e-07	2.45338	4.71362e-08	2.75668
17842307	5.41639e-07	1.66943
17764480	5.57905e-07	9.889	3.62671e-05	5.91674
17860243	5.57905e-07	9.889	3.62671e-05	5.91674
17701462	5.69592e-07	2.01041	1.39309e-05	1.78351
17640120	6.06439e-07	1.68065	0.000293788	1.41106
17872257	6.09442e-07	2.73196	3.58775e-07	2.81147
17771839	6.11632e-07	1.63146	1.14799e-05	1.51017
17844646	6.39442e-07	2.37879	2.71165e-06	2.22355
17635184	6.91964e-07	2.94494	0.00113455	1.89005
17678891	7.20978e-07	1.9499	8.4704e-06	1.7833
17715824	7.23685e-07	4.29506	3.20633e-06	3.81808
17791155	8.19242e-07	3.68422	7.89863e-06	3.1347
17718034	8.23068e-07	3.30262	0.000872725	2.07419
17873337	8.24203e-07	1.75254	1.36909e-07	1.85209
17756337	1.02066e-06	2.73009	0.000185437	2.03826
17723306	1.06871e-06	1.37459	6.57428e-06	1.33123
17881148	1.08498e-06	1.97731	7.69377e-07	2.0032
17854132	1.12518e-06	4.05466
17804983	1.1294e-06	1.54701	7.88539e-06	1.47572
17878292	1.15668e-06	-1.37515
17773194	1.18352e-06	1.91378	3.68949e-06	1.83665
17780324	1.25904e-06	-2.68512
17842140	1.28016e-06	3.18815
17801569	1.29546e-06	1.51017	1.59296e-05	1.42496
17883173	1.32574e-06	2.91524	4.98207e-06	2.69249
17829035	1.36475e-06	1.80131	8.29693e-07	1.8312
17650226	1.40878e-06	-1.378
17722383	1.43433e-06	2.88483	2.5736e-06	2.7859
17759143	1.46104e-06	6.33322	6.45103e-05	4.2577
17678629	1.63564e-06	2.01548	5.96336e-05	1.7451
17743767	1.64038e-06	1.74781
17666202	1.72662e-06	-2.17282
17870607	1.72722e-06	6.33111	6.66187e-05	4.30083
17706980	1.76736e-06	1.9151	3.46278e-07	2.03445
17724527	1.79904e-06	1.94848	0.000412307	1.57811
17644419	1.80988e-06	1.63046	0.000216811	1.42389
17632721	1.82614e-06	2.86639	0.00029491	2.10052
17678890	1.84664e-06	2.11612	9.42782e-05	1.78517
17870901	1.93202e-06	7.02241	0.000311765	3.94168
17744063	2.01822e-06	1.89609	1.23434e-06	1.93066
17769970	2.02553e-06	-1.67196	0.000299932	-1.43892
17760351	2.02896e-06	2.74604	0.000111523	2.17089
17841585	2.1048e-06	1.80693	0.000315047	1.51894
17681325	2.13069e-06	3.6139	0.000128371	2.65881
17842132	2.15058e-06	3.19877	0.000131339	2.42031
17844687	2.15058e-06	3.19877	0.000131339	2.42031
17852833	2.15912e-06	1.75864	2.69902e-05	1.61923
17844986	2.18406e-06	3.31233	1.10011e-05	2.96149
17881335	2.18479e-06	2.32317	0.000211128	1.85395
17626442	2.26467e-06	2.43185	1.65243e-05	2.19508
17866987	2.26835e-06	1.5824	3.70612e-06	1.5619
17761838	2.31411e-06	-2.02181
17632719	2.3531e-06	2.34164	0.000449427	1.79762
17880814	2.35668e-06	1.8615	0.000241414	1.57146
17641297	2.3795e-06	1.44713	2.17255e-07	1.52344
17774100	2.42204e-06	3.58381	3.52893e-05	2.9353
17743782	2.48348e-06	2.34853
17880082	2.502e-06	2.58356	6.81437e-06	2.44437
17600643	2.52611e-06	-2.2622
17610157	2.52611e-06	-2.2622
17612139	2.65669e-06	5.57627	0.00114185	2.97945
17866179	2.77951e-06	3.21237	7.48391e-05	2.56007
17627515	2.91936e-06	-1.7058	0.0001943	-1.49253
17827020	2.99634e-06	2.05049
17707346	3.03944e-06	1.96907	2.94644e-05	1.79775
17735295	3.08065e-06	2.16038	0.000173925	1.79446
17729561	3.09708e-06	1.49529	2.55481e-07	1.58647
17751327	3.27018e-06	1.76594	1.36108e-05	1.68307
17605377	3.28262e-06	-2.09169
17864112	3.29149e-06	2.95317
17656932	3.31277e-06	2.1606
17729695	3.38594e-06	3.1351	4.23655e-05	2.63931
17839270	3.46332e-06	2.86633	0.000480963	2.09162
17801541	3.56622e-06	1.58208	1.50672e-05	1.52097
17627635	3.85938e-06	1.64616	1.55479e-07	1.81151
17684937	3.9029e-06	1.69275	2.77504e-08	1.97933
17613551	3.95003e-06	2.70338	4.26747e-07	3.08584
17838332	4.02501e-06	1.61843
17702677	4.22862e-06	1.98972	8.18e-06	1.93614
17676709	4.45156e-06	1.47483	1.86247e-05	1.42607
17775649	4.48382e-06	2.50862	0.000284366	1.98461
17678321	4.56681e-06	-1.63166
17718317	4.57454e-06	1.82058	0.000145751	1.60366
17696200	4.5797e-06	3.87061	2.68263e-05	3.34785
17799004	4.71047e-06	2.14061	0.000660824	1.69486
17833734	4.76642e-06	2.11265	0.000224709	1.76939
17881074	4.96305e-06	3.018	3.05893e-06	3.11743
17849725	4.96861e-06	2.02489
17649952	4.99469e-06	2.93782
17649960	4.99469e-06	2.93782
17649962	4.99469e-06	2.93782
17756133	5.14364e-06	2.43704	4.77056e-05	2.15819
17811455	5.29404e-06	1.37691	1.39565e-05	1.35108
17880947	5.29734e-06	1.63097
17696464	5.30243e-06	-1.73702	0.000601987	-1.47536
17867296	5.35892e-06	1.65059
17809643	5.39458e-06	2.48351	1.80177e-06	2.63912
17719505	5.40638e-06	3.48422	2.38402e-05	3.1105
17669111	5.48181e-06	1.72702	7.71244e-07	1.84364
17645302	5.54589e-06	3.66341	0.000631479	2.49158
17605893	5.63959e-06	-2.86779
17694707	5.65547e-06	2.16996	8.11895e-06	2.13306
17665328	5.69389e-06	2.21735	2.84362e-05	2.0494
17870897	5.78007e-06	1.39201	3.99712e-06	1.40244
17646221	5.94752e-06	2.16606
17653597	6.04978e-06	2.02641
17793944	6.09649e-06	1.54699
17736120	6.29057e-06	2.14643	0.000399775	1.75798
17607739	6.40229e-06	-1.56976
17609157	6.40229e-06	-1.56976
17699970	6.70125e-06	-1.84393	0.00021577	-1.6133
17881823	6.78864e-06	2.50819	0.0010157	1.86891
17643674	6.84952e-06	1.79184	1.03552e-05	1.76525
17606633	6.92883e-06	-2.79075
17670116	7.01897e-06	6.27479
17851926	7.52769e-06	2.7441	0.00104135	1.99211
17600911	7.57323e-06	-2.63313
17601231	7.57323e-06	-2.63313
17791999	7.73322e-06	-1.81623
17768104	7.85316e-06	1.73658
17674977	7.9389e-06	2.66228
17876611	7.96825e-06	2.16423	1.5152e-08	2.93292
17698850	7.96875e-06	2.07643
17844984	8.07254e-06	2.14094
17878839	8.11889e-06	2.04797	0.000969156	1.64092
17670114	8.22166e-06	1.83704	4.00667e-05	1.72873
17835650	8.25842e-06	2.13912	1.36631e-05	2.08828
17724532	8.63119e-06	1.92824	1.82708e-06	2.05566
17602529	8.6446e-06	-2.09095
17822551	8.75982e-06	-1.83044
17810696	8.76619e-06	1.71558	1.57188e-06	1.81853
17829158	8.77061e-06	1.75958
17671678	8.77539e-06	1.85297
17881367	8.88034e-06	3.05033	8.75601e-07	3.58823
17740971	8.98336e-06	2.57559	7.88372e-06	2.59574
17644941	9.04462e-06	2.39986
17683555	9.05987e-06	2.60379	0.000267881	2.11399
17717361	9.26269e-06	-1.39358
17724607	9.32343e-06	1.66479	0.000205188	1.50442
17748416	9.55203e-06	3.38928	3.90888e-05	3.03746
17740982	9.6674e-06	2.10889	9.13682e-07	2.35707
17837146	9.83168e-06	2.29105	2.32267e-06	2.47131
17715837	9.98299e-06	1.9034	2.46994e-07	2.21338
17846980	1.00805e-05	1.5727	1.34346e-05	1.55973
17735494	1.01098e-05	1.46921	7.01327e-06	1.4824
17738217	1.03644e-05	-1.70241
17831711	1.06142e-05	-1.46933
17650742	1.06444e-05	1.60778	7.39328e-08	1.86875
17848896	1.06637e-05	2.73423
17766246	1.07679e-05	2.42438	0.000248481	2.02348
17798817	1.16412e-05	-1.90796	1.35284e-05	-1.89609
17875489	1.19292e-05	1.62877	2.84841e-06	1.70344
17677875	1.19576e-05	1.59022
17674953	1.19723e-05	2.74668
17632544	1.23574e-05	1.57151
17702230	1.23759e-05	-1.81688	1.14654e-05	-1.82224
17631448	1.25259e-05	-2.09607	0.000223968	-1.822
17825668	1.25795e-05	-1.80557	2.13404e-05	-1.76943
17853810	1.27239e-05	-2.37834	0.000125746	-2.08865
17724289	1.2792e-05	3.26939	0.000100285	2.78755
17782566	1.33395e-05	2.01671	0.000763135	1.66859
17624523	1.34752e-05	2.5141
17736690	1.34752e-05	2.5141
17739042	1.34752e-05	2.5141
17839395	1.34752e-05	2.5141
17856988	1.34752e-05	2.5141
17839737	1.35037e-05	2.45726	4.23458e-06	2.62883
17845272	1.3514e-05	-2.02744	0.00080413	-1.67146
17666043	1.36913e-05	2.02812
17881785	1.37608e-05	-2.28004	9.57499e-05	-2.05276
17883197	1.39806e-05	4.32446	7.81804e-05	3.66484
17644205	1.46542e-05	1.96141	0.000677126	1.6493
17793995	1.50181e-05	2.91692
17825181	1.50181e-05	2.91692
17839274	1.5561e-05	2.8981
17756335	1.59764e-05	2.47025
17734546	1.6051e-05	1.433
17614071	1.61467e-05	1.71447
17805244	1.62029e-05	1.98756	5.44063e-05	1.88105
17624216	1.65248e-05	2.37878
17734813	1.683e-05	1.7053
17656249	1.71206e-05	1.86656
17607629	1.76904e-05	6.10408	0.000320773	4.28466
17609047	1.76904e-05	6.10408	0.000320773	4.28466
17600523	1.81869e-05	-2.29774
17692307	1.82839e-05	3.86122	0.000426988	2.89239
17751317	1.82879e-05	1.39642
17686641	1.83474e-05	1.40135	9.14021e-06	1.42335
17675638	1.85435e-05	1.71215	0.00111696	1.4716
17645113	1.94065e-05	1.86775	6.58632e-05	1.77444
17880619	1.95428e-05	1.98765	0.000202834	1.78263
17652598	1.99057e-05	1.58381	1.79357e-05	1.58889
17649015	2.01826e-05	2.19336	0.000107005	2.0076
17690575	2.06084e-05	-1.54922	0.000810009	-1.38669
17748625	2.09087e-05	1.95531
17822611	2.0952e-05	2.16296
17616002	2.13108e-05	3.18579	0.000109732	2.80079
17712756	2.16756e-05	2.20797	4.20837e-08	3.07366
17859208	2.18921e-05	-1.53975
17611073	2.20844e-05	3.16656
17767113	2.22253e-05	1.46555	1.21377e-07	1.67436
17678892	2.24995e-05	1.86166	3.53553e-05	1.82664
17646717	2.26075e-05	3.52995	0.000584941	2.65759
17714900	2.31293e-05	-1.76933	3.95293e-06	-1.89331
17728036	2.34519e-05	1.92043	0.00118488	1.60551
17743773	2.3574e-05	2.9448
17739910	2.45092e-05	3.56178	0.00124373	2.50882
17602423	2.45907e-05	-2.58781	0.000147109	-2.30243
17765735	2.51825e-05	2.111	0.000218824	1.88817
17719533	2.55307e-05	1.8957	1.78849e-06	2.12646
17809199	2.55865e-05	3.10643
17837007	2.58504e-05	-1.63647	0.000112892	-1.55671
17713540	2.62762e-05	2.43411	0.000193629	2.1525
17867251	2.6725e-05	2.03452	0.000275811	1.81306
17778278	2.74885e-05	1.21035	0.000338573	1.17052
17868250	2.75856e-05	-1.46407
17678893	2.77616e-05	1.76041	4.69069e-07	2.059
17849096	2.77693e-05	1.77439	0.000382261	1.59725
17812760	2.87314e-05	-1.74964	1.66803e-05	-1.78652
17600805	2.91197e-05	-2.93962
17862005	2.97349e-05	-1.54951	0.000208253	-1.45988
17835900	3.0122e-05	1.77388	0.000130679	1.67289
17866734	3.0306e-05	2.93615	0.00119093	2.21415
17751221	3.04172e-05	2.55771
17730290	3.05816e-05	1.50168	0.000761817	1.36854
17883564	3.09484e-05	-2.80249	3.8218e-05	-2.76062
17600519	3.10096e-05	7.29801
17698354	3.10409e-05	-1.60494	8.62193e-06	-1.67325
17665130	3.1418e-05	-1.90899	0.000119668	-1.79709
17825926	3.14185e-05	-1.59149	1.71897e-05	-1.62258
17867336	3.15315e-05	3.97347	0.00027722	3.2172
17880748	3.16026e-05	1.70701
17687967	3.2239e-05	1.73871	1.27371e-05	1.80152
17682947	3.3165e-05	2.34042
17600791	3.33517e-05	-3.03209
17666271	3.46649e-05	2.63909	0.000658735	2.15089
17721464	3.57584e-05	-1.53415
17646017	3.59667e-05	-2.20824
17775062	3.62871e-05	2.23942	9.30198e-05	2.12275
17613658	3.6531e-05	1.61583	3.10997e-05	1.62459
17654217	3.65478e-05	1.4534
17621010	3.67857e-05	1.33194	9.04392e-07	1.43369
17723019	3.76203e-05	-1.61176	0.000842023	-1.44789
17719967	3.77436e-05	3.89465
17764275	3.92982e-05	1.46398
17636536	3.96108e-05	1.71145
17612533	4.00529e-05	1.96774	9.66553e-06	2.10513
17865119	4.03646e-05	-1.43621	0.000610328	-1.33755
17830400	4.12162e-05	1.39735	2.91072e-05	1.40888
17623683	4.14731e-05	1.48158	9.66111e-05	1.4469
17846651	4.15477e-05	-1.42416	0.000741719	-1.32244
17868547	4.17263e-05	2.45515
17872261	4.22828e-05	2.17398
17625025	4.25504e-05	1.67968
17717103	4.3153e-05	3.96054	2.31394e-05	4.20858
17718537	4.33214e-05	-1.96042
17718329	4.35833e-05	-1.42231	0.000178616	-1.3724
17664447	4.36939e-05	1.5486	4.35925e-07	1.78376
17845631	4.42043e-05	2.38027
17705719	4.49829e-05	-1.31702
17652417	4.59583e-05	1.96735	7.61006e-05	1.9198
17609609	4.60676e-05	-1.73966	4.03939e-05	-1.74872
17786877	4.62087e-05	1.70109
17822329	4.62451e-05	1.95678
17773315	4.62713e-05	-2.62726
17622904	4.63474e-05	1.69238	3.76533e-05	1.70564
17766248	4.65162e-05	4.07293
17778750	4.68834e-05	5.30343
17833029	4.71015e-05	1.59232	4.3391e-05	1.59667
17602591	4.7479e-05	-4.3875
17873891	4.85777e-05	1.82736
17726532	4.87283e-05	-1.69048
17614309	4.88582e-05	1.7431	7.60539e-05	1.71249
17602203	4.92218e-05	-2.50843
17795957	5.02483e-05	1.99169	0.000559863	1.76255
17727949	5.14037e-05	3.92162	0.000566409	3.07938
17871865	5.144e-05	1.48287
17878251	5.17149e-05	-2.04811
17745564	5.30387e-05	2.42815
17867715	5.33944e-05	1.60622
17789808	5.35305e-05	2.26922
17817822	5.35442e-05	-1.47874
17834578	5.43507e-05	-1.46014
17637632	5.43524e-05	2.7694	8.26283e-05	2.68482
17671695	5.46086e-05	1.5068	0.000721294	1.39285
17870279	5.62522e-05	-2.23905	0.000540497	-1.95553
17778752	5.67548e-05	2.60616	0.00045213	2.24907
17698102	5.6783e-05	1.55661	5.79724e-05	1.55557
17627117	5.68081e-05	-1.79822
17671811	5.75165e-05	-1.50525	0.000885705	-1.3844
17623677	5.76213e-05	3.61946
17746126	5.79737e-05	-2.22574	1.86787e-06	-2.7113
17827431	5.84113e-05	1.58717
17722864	5.8426e-05	2.03466
17743101	5.8664e-05	-1.78697
17749357	5.93377e-05	1.33275	5.42342e-06	1.40049
17645398	5.94394e-05	-1.53873	4.95745e-06	-1.66224
17602441	5.94759e-05	-2.72451	0.00021062	-2.48119
17605769	5.9699e-05	-3.06642
17850643	5.98011e-05	1.87908	0.000187481	1.78178
17730862	6.01614e-05	2.36746
17740020	6.05978e-05	-1.96726
17607431	6.16142e-05	-2.16148
17634974	6.16238e-05	1.71135	4.5992e-05	1.73113
17859645	6.17195e-05	2.02005	0.000140166	1.93592
17755554	6.19863e-05	4.1733	0.0001575	3.78218
17608697	6.2403e-05	-1.88625	0.000451897	1.71725
17879815	6.30981e-05	2.1254	1.35992e-06	2.61935
17635765	6.31305e-05	1.67345
17878820	6.34093e-05	-1.30283
17700674	6.5414e-05	-2.32652
17766696	6.66799e-05	1.7927	0.000881475	1.59928
17880961	6.7977e-05	1.52906
17747897	6.83329e-05	1.9665
17787113	6.84885e-05	-3.0124
17749134	6.85645e-05	2.39534	0.000106508	2.32791
17692370	6.96756e-05	1.7651
17602545	6.98662e-05	-1.82938
17827963	7.09897e-05	-1.76813
17600203	7.14642e-05	-3.01132
17603237	7.26813e-05	-2.29089
17878974	7.29756e-05	-1.43924
17699265	7.42541e-05	4.92584	0.000106627	4.71803
17637628	7.57798e-05	1.69287	0.000199132	1.62929
17804980	7.57944e-05	2.37694
17854183	7.65422e-05	-1.36137	0.00130471	-1.27259
17681319	7.69559e-05	1.93497
17791708	7.7223e-05	2.61735
17832393	7.72598e-05	2.35483
17874856	7.72657e-05	1.80896	0.000194977	1.73568
17786970	7.77456e-05	-1.48791
17830117	7.77626e-05	1.38648	0.000170127	1.36003
17678889	7.80124e-05	1.61025
17657789	7.80808e-05	2.79231
17727544	7.84237e-05	1.5905
17720672	7.88292e-05	-2.12257
17882873	7.88292e-05	-2.12257
17652514	7.94392e-05	-1.73671	0.000236227	-1.65941
17739447	8.02506e-05	1.55693	0.00020908	1.50778
17700345	8.04073e-05	1.608
17872770	8.19003e-05	2.41382	9.72952e-05	2.3864
17763426	8.21764e-05	1.82469	9.12823e-05	1.81603
17818517	8.39084e-05	-1.2547
17843371	8.40923e-05	2.08609	0.00120056	1.79241
17788103	8.70105e-05	1.74479	0.00120795	1.5568
17739303	8.76762e-05	-1.615
17637310	8.88556e-05	1.38675
17635916	8.91424e-05	2.41986
17605235	8.93018e-05	-1.80866
17846471	8.97809e-05	1.42071
17666852	9.09375e-05	-1.34681
17872419	9.13095e-05	-1.49667
17875663	9.14216e-05	1.42879	6.78328e-05	1.44035
17645038	9.15412e-05	3.56165
17836741	9.15412e-05	3.56165
17791546	9.17229e-05	-1.37196	0.000639616	-1.30817
17735609	9.17493e-05	1.85853
17618057	9.30619e-05	-1.75292	4.21061e-05	-1.81291
17852677	9.49544e-05	1.77944	6.31776e-06	2.00041
17769173	9.66788e-05	1.84334	0.000189876	1.78582
17686353	9.75468e-05	1.96405
17882163	9.97624e-05	1.76798
17828823	0.000101028	1.92661
17681307	0.000101038	2.87934
17883185	0.000101207	2.05973
17720378	0.000102747	-1.86072
17603801	0.000103332	-2.30543
17605025	0.000104631	2.44088
17830106	0.000105002	1.53387	0.000795718	1.43281
17611501	0.000105059	1.95414
17766939	0.000105553	2.15269	0.000209423	2.06686
17822582	0.000106167	1.77917	2.02563e-05	1.91316
17872600	0.00010794	-1.53153
17602509	0.000108846	-2.12955	0.000564428	-1.93128
17796609	0.000110265	1.45635
17811368	0.000110432	1.59446
17626554	0.000110478	-1.39844
17883514	0.000110563	-2.43882	9.80595e-07	-3.352
17644349	0.000111071	2.4776
17675699	0.000112069	2.00672	1.21206e-06	2.54698
17866714	0.000113914	1.47503	0.000236886	1.44262
17882057	0.000114222	1.41523	5.77528e-05	1.4413
17727114	0.000115797	1.82901
17677351	0.000115929	1.62659
17796618	0.000118492	1.45964	0.000240673	1.42932
17600799	0.00012008	-2.74934
17707450	0.000120293	3.43582
17604783	0.000120459	2.14853
17728492	0.000124611	-1.27368
17671409	0.000125412	-1.5079
17829719	0.000126032	-1.48681
17652123	0.000126991	-1.987
17805996	0.000127361	-1.32748
17804598	0.000127398	1.73376
17835135	0.000127758	3.24211
17749668	0.000129921	2.53238
17829858	0.000130413	2.69848	0.000387676	2.47631
17878572	0.000130435	1.74156
17702182	0.000130596	2.45679	0.000504513	2.23004
17811991	0.000131139	-1.30505
17765471	0.000131485	1.67972
17763738	0.000132734	-1.4599	5.65901e-05	-1.49713
17661661	0.000134251	-1.85462
17840296	0.000134859	1.4697	0.000196604	1.45293
17835350	0.000135487	1.85953	0.000726463	1.71019
17609917	0.000135581	-2.70984
17811692	0.000136181	2.33361	5.90505e-05	2.46662
17858558	0.000136909	1.70225
17778505	0.000137032	1.76127	0.00129625	1.58855
17636007	0.000137529	1.28204
17838939	0.000139242	1.46251
17602803	0.000139635	-2.38407
17837846	0.000140494	1.82398
17683802	0.000140914	-1.54086
17712294	0.000141013	1.63453	2.23823e-06	1.9127
17810220	0.000141147	1.87752	0.000703673	1.73039
17833380	0.00014183	1.35727
17722258	0.00014195	4.54242
17877266	0.000142056	3.00589	0.000264017	2.84684
17797336	0.00014271	-1.26481
17866175	0.00014348	2.05107
17739999	0.000145623	1.51096
17810126	0.000146185	1.51904	0.000463435	1.46123
17838598	0.000146644	-1.70294
17809652	0.000146881	2.65558	0.000583696	2.38188
17615650	0.000148308	3.75557
17655482	0.000148411	-1.39896
17722676	0.000148642	-1.52867
17794781	0.000149789	1.52067
17732752	0.000151489	1.66534
17721466	0.000151662	-1.62143	0.000131668	-1.63027
17663323	0.000152029	2.06277	0.000381758	1.95494
17791842	0.000154881	-2.06177
17764101	0.000154968	1.95831	5.10345e-05	2.07741
17691425	0.000155043	1.45029
17878279	0.000155125	1.538
17834057	0.000155289	1.31107
17674321	0.000156563	-1.97721	2.49597e-05	-2.18208
17674322	0.000156563	-1.97721	2.49597e-05	-2.18208
17857412	0.000156719	1.51274	0.000428204	1.46269
17766258	0.000159522	2.50531	6.26796e-05	2.68198
17646114	0.000159871	2.45842
17719501	0.000160026	1.85782	4.44385e-05	1.97839
17824194	0.000161078	2.14125
17772095	0.00016301	1.26601	3.61457e-06	1.35826
17626338	0.000166947	1.56043	6.4867e-05	1.61368
17880689	0.000168666	-1.43578
17667579	0.000171776	1.67562	0.000151315	1.68448
17635186	0.000173439	2.90445
17718539	0.000174073	3.40206
17608163	0.000174564	-1.85143
17831494	0.000176013	-1.59192
17688794	0.000176827	2.12344
17780857	0.000178161	2.15772
17763121	0.000178282	1.43222	0.000421358	1.39647
17605835	0.000178521	-2.00066	0.000836825	-1.83122
17621925	0.000178638	1.47006
17771703	0.000179006	1.36118	2.02132e-05	1.43603
17632701	0.000180141	1.89532	0.000401248	1.81753
17602463	0.000182667	-2.154
17848555	0.000183133	-1.53002
17825498	0.000186352	2.23008
17714886	0.000186662	1.53909
17873457	0.000186812	1.93821
17853097	0.000187604	-1.50488
17836280	0.000188593	1.56297
17696198	0.000189441	2.12289
17691433	0.000190134	2.10424	4.09113e-05	2.30682
17798100	0.00019151	1.5747	0.00030467	1.5477
17618154	0.000192981	1.81911
17818705	0.000193196	-1.3694
17791439	0.000195884	-1.6074
17823538	0.000196439	2.28588	0.00051267	2.14064
17793743	0.000198016	1.49444
17881577	0.000202086	-1.63357
17881733	0.000202086	-1.63357
17692576	0.000202649	2.45412
17693408	0.00020464	-1.31258
17802707	0.000206994	1.32241	7.65538e-06	1.42385
17881905	0.000208601	-1.34369
17681948	0.000210678	1.5266	6.8301e-05	1.58706
17606485	0.000213307	-2.37688
17842925	0.000214158	1.86576	9.71533e-06	2.17944
17759158	0.000214171	1.46569	0.000476923	1.42877
17754983	0.000214589	1.77504
17866181	0.000215426	1.64499
17602459	0.00021554	-2.96814	0.000439122	-2.7827
17724128	0.000217389	1.99124
17608831	0.000219	-1.6744	0.00101362	-1.56635
17712019	0.000220262	-1.50427
17703989	0.000221316	1.44755
17697482	0.000221437	-1.66586
17756608	0.000221613	1.92349
17600885	0.000222399	-2.29425
17715833	0.000222814	1.78302
17851448	0.000224212	-1.49545
17636532	0.000224396	-1.30272	0.000171824	-1.31035
17862001	0.000225451	2.29131	0.000920577	2.07607
17828537	0.000226114	-1.35185
17653796	0.00022741	2.01584
17869698	0.000230453	-1.48786
17847480	0.000230833	1.6565
17799552	0.000233082	-1.56943
17793044	0.000235679	2.70318
17740709	0.000235956	2.20092
17838716	0.000238006	1.59596
17852336	0.000241032	1.62805	6.66478e-07	2.05235
17611688	0.000242642	1.56381
17600843	0.000242681	-1.95536
17659582	0.000243143	1.81332	0.000191746	1.83483
17747277	0.000243817	1.6712	0.000437232	1.62947
17839455	0.000247895	1.80972
17846119	0.000254191	1.50889	6.88225e-05	1.57769
17715935	0.000255551	1.66866	0.00016057	1.70222
17665755	0.000255786	-1.71507	0.000378755	-1.68464
17603925	0.000260004	-2.14812
17715768	0.000263029	1.42237	6.22866e-05	1.48368
17861310	0.000265855	2.64435
17793520	0.000266686	-1.70847
17692574	0.000276045	2.51216
17849232	0.000281488	2.24809	5.91022e-05	2.49891
17711509	0.000281752	1.92001
17631343	0.000282249	1.77919	0.000404962	1.74786
17809201	0.000283619	1.31686
17614449	0.000284964	1.33157	0.000689738	1.30285
17761493	0.000285664	1.45401
17707893	0.000290001	-1.68985
17880571	0.00029385	1.38088	6.52249e-05	1.43844
17604359	0.000295129	-2.39395
17861074	0.000295275	1.39276	8.14897e-05	1.44373
17879645	0.000297449	-1.32718	9.51988e-06	-1.439
17602475	0.000300782	-2.19457	0.000363261	-2.16681
17818103	0.000301606	-1.39578
17650320	0.000302757	1.63363
17689442	0.000306636	-1.23077
17639126	0.00031733	-1.37163
17883159	0.00031871	1.21349
17605401	0.000320563	-2.17661
17760187	0.00032336	-1.88284	8.11056e-05	-2.02828
17608327	0.00032349	-1.45783
17867334	0.000324241	1.76561
17666755	0.000328472	1.96501
17655243	0.000330644	1.58315	4.31937e-05	1.7137
17825179	0.000332128	1.68686	0.000697559	1.63056
17673184	0.000335993	-1.92815
17605681	0.00033798	-1.90356
17622590	0.000338599	1.44943	0.000166384	1.48269
17673849	0.000338818	-1.35971
17600385	0.000339359	-2.15618
17803828	0.000341216	1.66472
17829143	0.000350455	-1.67844	0.000225382	-1.71201
17792272	0.00035194	-1.70549
17643895	0.000352775	2.00576	0.000836087	1.90221
17671390	0.000355141	2.66363
17671392	0.000355141	2.66363
17671394	0.000355141	2.66363
17674932	0.000355141	2.66363
17674940	0.000355141	2.66363
17656676	0.00035556	-1.34591
17600925	0.000355988	-1.77657
17601245	0.000355988	-1.77657
17601259	0.000355988	-1.77657
17883177	0.000361461	2.94372
17881799	0.000361571	-1.4593
17788808	0.000361754	-1.31614
17795640	0.000366318	-1.4262
17784757	0.000369883	1.94623
17600819	0.000373683	-2.70237
17608855	0.000374544	-1.73549
17757034	0.000379631	2.19097
17881801	0.000380637	-1.45304
17740203	0.000380712	1.91098
17625168	0.000382549	-1.61794
17755940	0.000383468	-1.60005	6.64543e-05	-1.71796
17797354	0.000383835	-1.53601
17700392	0.000384122	-1.62261	0.000170037	-1.67936
17827731	0.000386079	1.5232	0.000285013	1.54036
17753238	0.000386129	1.91665
17756767	0.000388763	1.64645
17832979	0.000392254	1.87811	0.000492713	1.85437
17837435	0.000394701	-2.05777
17771869	0.000396689	2.75361
17877891	0.000397753	1.85597
17801023	0.000401569	1.96674
17822695	0.000402013	-1.879
17806394	0.000403013	-1.25674
17627913	0.000403499	1.85279
17602449	0.000405423	-2.56773
17728456	0.000406601	-1.28768
17629208	0.000406949	-1.33432
17735015	0.000408054	1.3335
17647752	0.000408288	1.45085	7.02109e-05	1.53584
17609439	0.000409396	-1.96728
17823500	0.000410196	-2.33243	3.80158e-05	-2.77621
17870573	0.00041626	1.85661
17697502	0.000416472	2.10568
17694324	0.000417539	-1.30155
17713337	0.000423256	2.02908	0.000942644	1.9281
17631009	0.000424994	1.38851
17637528	0.000428812	1.4059	4.37958e-05	1.5042
17686506	0.000429238	-1.45605
17608725	0.000429653	-2.51002	5.58971e-05	-2.95607
17631022	0.00043033	-1.69567
17655604	0.000431072	1.47467
17641749	0.000431664	1.50367	0.000136147	1.56723
17616903	0.00043627	-1.75795
17608829	0.000436323	-2.20834
17839343	0.000437728	2.05492	0.00051634	2.03313
17645015	0.000442086	-1.45959	0.00022677	-1.49264
17696746	0.000442132	1.43329
17789522	0.00044234	-1.54558
17608671	0.00044297	-2.01164
17796556	0.000449101	2.58537	0.000635811	2.50958
17774751	0.00045561	-1.62486
17757010	0.000456495	1.35388
17753145	0.000460817	1.48687	2.73873e-05	1.63948
17762798	0.00046253	-1.42057
17863669	0.000464025	1.5663	0.000171381	1.62975
17623951	0.000465233	1.29437
17708637	0.000467526	1.59509
17830578	0.000469892	1.62502	0.000682843	1.59852
17623254	0.000473838	1.61378
17623743	0.000474349	1.64799	4.86685e-05	1.82131
17711506	0.000479834	-2.50085
17604705	0.000480039	-2.11859
17706909	0.000480406	1.40121
17615342	0.000480783	1.57554
17677604	0.000480952	-1.4264
17651686	0.00048197	2.03788	4.29923e-05	2.37089
17667321	0.000482145	1.65826
17656084	0.000484208	1.5757
17815971	0.000485932	-1.45562
17880519	0.000488989	1.3078	9.08673e-05	1.36125
17646239	0.000492989	-2.04574
17716040	0.00049601	-1.32971
17719222	0.000497762	-1.44614
17832845	0.000499039	-1.60958
17705657	0.000499489	-1.77901
17666019	0.000499923	-1.23881
17832678	0.000502933	-1.41717
17787861	0.000505785	-1.3104
17636300	0.000509855	-1.88132
17778973	0.00051129	3.61386
17748621	0.000511889	1.34074
17605271	0.000512502	-1.59763
17745621	0.000512658	2.10915
17610523	0.000513314	1.9765
17796902	0.000517628	1.37382	6.5301e-06	1.55125
17883157	0.000517994	1.16923	0.000257347	1.18084
17799944	0.000519746	3.48524	0.000428361	3.56263
17628790	0.000519859	-2.27816
17799482	0.000523569	-1.88291
17609205	0.000524242	-2.54671
17609405	0.000526225	-2.50573
17608255	0.000526948	-3.12502
17700185	0.000530617	-1.49945
17704975	0.000531204	1.712
17834050	0.000534102	1.42096
17600455	0.000539678	-2.42299
17820414	0.000540468	1.34138	6.73325e-06	1.50208
17642368	0.000540737	2.11223
17764283	0.000542931	1.3027	1.50828e-05	1.41644
17722250	0.000551156	1.64837
17835125	0.000553109	1.40152	0.00028172	1.43088
17650720	0.000554022	1.53324
17624207	0.000555468	1.41365	0.000238896	1.45168
17880265	0.000558601	-1.30438
17772383	0.000559212	1.62294
17874051	0.000568021	2.05291	0.000326365	2.12914
17601015	0.000572632	-2.24446
17601349	0.000572632	-2.24446
17793992	0.000573518	1.51031
17602519	0.000574256	-1.94952
17736039	0.000578381	1.73167
17667987	0.000578427	1.71338
17660840	0.000578455	-1.40414
17829530	0.000578565	-1.54268
17872759	0.000580406	-1.49678
17739677	0.000581999	1.31698	6.2674e-05	1.39176
17822561	0.000585942	2.23364
17881403	0.000592227	2.01381	7.84028e-06	2.6346
17715725	0.000594427	1.62558	6.09995e-08	2.40335
17603845	0.000606875	-1.68424
17690254	0.000607215	-1.76363
17768226	0.000608797	1.55352
17746014	0.000609128	-1.25155	2.7054e-05	-1.33258
17868717	0.000623302	-1.27496
17859523	0.000627863	1.58766	0.000206883	1.66435
17680657	0.000630936	-1.18012
17775569	0.00064155	-1.7955
17863204	0.000647257	1.66409
17673249	0.000649627	-1.21692	0.000161956	-1.24784
17829401	0.000652573	1.80286	1.24884e-06	2.50255
17602671	0.000653692	-1.84372
17741221	0.000654575	1.70712	5.67704e-06	2.14278
17681887	0.000655243	-3.5808
17647750	0.000655387	-1.40661
17742533	0.00065544	-1.56289
17602597	0.000659188	-1.88128
17765542	0.000659327	1.96479	0.000166148	2.14079
17690397	0.000659542	1.45538	1.87805e-05	1.64185
17826444	0.000673594	1.51798
17851961	0.000681817	-1.36026
17796694	0.000684142	1.71962
17675782	0.000684458	-1.41922
17749699	0.000686076	1.63906
17751998	0.000687188	-1.37571
17603023	0.000690237	-2.30155
17806441	0.000695869	1.57894	0.000144081	1.68761
17637393	0.0006963	-1.56023
17796579	0.000698792	-1.6438
17666518	0.000699903	1.67742
17747511	0.000699903	1.67742
17790889	0.000700568	1.40276	1.04001e-07	1.82991
17688099	0.000707961	-1.9634
17722348	0.000709311	-4.61108
17603213	0.00071544	-1.93586
17735918	0.00072046	-1.19872
17600879	0.000722893	-1.84148
17606189	0.00072528	-2.05289
17688961	0.000727732	1.71494	0.00089436	1.69684
17601569	0.00072908	2.25518
17843897	0.000731589	1.8239
17870221	0.000732229	1.96236
17683181	0.000735987	-1.62958	0.000177315	-1.73879
17673838	0.000745382	1.60927
17745132	0.000747704	1.58268	2.16444e-05	1.83688
17600839	0.000752979	-2.48462
17762282	0.000767398	1.32089
17601683	0.000769924	2.9666
17883568	0.000776564	-2.45271	3.97353e-05	-3.13834
17839294	0.000777334	1.84027
17828413	0.000790537	1.35081
17600083	0.000791433	-1.82885
17793398	0.000791768	-1.89627
17666200	0.00079181	-1.29702
17869946	0.000799584	-1.42689	0.000291369	-1.47628
17749017	0.000802175	2.19309	0.00039401	2.31286
17810041	0.000809525	2.10286
17603649	0.000811449	-2.74188
17747629	0.000812478	-1.58536	1.37022e-06	-2.07202
17779880	0.000820362	1.42087	2.41922e-05	1.5934
17605675	0.000825595	-2.13306
17868049	0.000825991	-1.41351
17617200	0.000827087	-1.65972
17767420	0.00082877	-2.01003
17704784	0.000829996	1.92523
17816850	0.000833068	-2.21409
17609881	0.00084023	-2.50883
17874989	0.000842429	-1.39698
17874990	0.000842429	-1.39698
17689697	0.00084291	-1.67667
17841802	0.000843228	1.79104	0.00104725	1.76917
17697491	0.00084608	1.37743	0.000540222	1.39661
17693886	0.000851439	1.41239	0.000955965	1.40691
17799875	0.000860104	1.45372
17649551	0.000865321	-1.44157
17875764	0.000866645	1.4902
17732255	0.000867575	-1.24095	0.00112366	-1.2342
17848927	0.000868451	-1.3726	4.13837e-07	-1.71238
17801167	0.000869223	1.39521
17726961	0.000873535	2.43099
17603805	0.000875052	-2.18929
17758541	0.000875697	-1.21358
17831906	0.000884698	2.8284
17671173	0.00088728	-1.72422
17724936	0.000887572	1.39939	0.00125047	1.38365
17610460	0.000887812	2.21539
17670120	0.00088925	2.17664
17748623	0.000892857	1.8832
17673103	0.000896654	1.70997	0.00100657	1.69962
17667257	0.000897987	1.28839	0.000754373	1.29394
17614865	0.000898693	2.77261
17880184	0.000901093	2.14191
17640452	0.000905185	-1.68557
17800866	0.000905215	-1.37142
17600673	0.000905648	-1.99358
17610187	0.000905648	-1.99358
17788304	0.000906733	1.80322
17740479	0.000906833	1.77317
17864988	0.000907288	-1.64299
17604033	0.000916496	-1.73406
17605023	0.000918792	-1.84869	0.000683485	-1.88177
17716274	0.000919191	-1.27221
17842108	0.000925162	1.76029
17716122	0.000927866	-1.33109
17683157	0.000931735	-1.23182
17827561	0.000941479	1.30299	0.000333176	1.33812
17801878	0.000941784	1.66597	0.000468504	1.72472
17728618	0.000943038	1.25187	1.7614e-05	1.36137
17816099	0.000949192	-1.2999
17609777	0.000950271	-1.55034
17718360	0.000952065	2.27052
17734841	0.000953081	-1.38581
17776763	0.000959776	1.28364
17607293	0.000961847	-1.77025
17883512	0.000962589	-2.00657	5.87697e-05	-2.41429
17706861	0.000966283	1.37509	0.00110542	1.36927
17823604	0.000975889	-1.43716
17703425	0.000981099	2.73315
17843717	0.000988495	-1.56546
17806222	0.000988677	-1.41993
17605541	0.000989549	-2.7118
17867338	0.0009899	2.54938
17701933	0.000993169	-1.32964
17753138	0.000997229	1.52836	2.89009e-05	1.76212
17801260	0.000998167	1.93104
17763124	0.000998528	-1.27198
17797369	0.00100687	-1.34616
17603593	0.00100909	-2.12798
17871607	0.00101409	1.76917
17856642	0.00101524	1.44465
17811631	0.00101674	1.71313	1.5538e-05	2.11907
17794983	0.00101931	2.43475
17747780	0.00103081	-1.25072	0.000151981	-1.30363
17818701	0.00103155	1.21971
17777215	0.00103158	1.33613
17769602	0.00103501	1.39474
17861575	0.00104324	1.6957
17880471	0.0010493	1.2728
17644136	0.00105111	-1.41757
17665014	0.00105249	-1.41151	0.000576835	-1.44072
17665114	0.00105337	-1.90971
17663879	0.00105456	-1.46298
17631700	0.00105957	1.36371	0.000618252	1.38646
17740954	0.00106508	-1.55402	0.000450784	-1.61318
17753550	0.00107004	1.42593
17715873	0.00107338	1.29869
17715279	0.00107797	1.38187
17668410	0.00108161	-1.4068
17734560	0.00108689	1.78957	0.000604574	1.85126
17640049	0.00108768	-1.79911
17600857	0.00108875	-1.55
17700158	0.0010899	1.35222
17651036	0.00109238	1.56604	0.000371333	1.64257
17761795	0.00109402	-1.55769
17602421	0.00109496	-2.0754
17880994	0.00109554	1.84751
17607341	0.00109716	-2.00444
17859649	0.00109924	2.20904
17687615	0.00110071	1.67049
17880485	0.00110362	1.36276
17699284	0.00110491	1.82296
17844134	0.00110929	-1.55934
17808851	0.00111095	-1.49818	0.000357104	-1.5676
17687759	0.00111406	-1.58015
17602727	0.00111579	-2.57318
17603009	0.00111652	2.20115
17600629	0.00111701	-1.85002
17610143	0.00111701	-1.85002
17746179	0.0011196	-1.21739
17702990	0.00112376	1.58102
17817883	0.00112837	-1.76602
17709030	0.00113156	-1.3068
17608865	0.00113693	-2.19706
17630554	0.00113774	1.32594
17770757	0.00114422	1.6494
17603053	0.0011473	2.06617
17780647	0.00115018	1.58345
17601175	0.00115503	-1.89326	0.000512986	-1.99365
17601509	0.00115503	-1.89326	0.000512986	-1.99365
17757612	0.0011573	-1.25334
17610281	0.00115919	1.66608
17674432	0.00116003	1.2542
17602351	0.00116036	-1.95115
17872120	0.00117279	-1.37377
17853499	0.00117338	-1.67697
17681331	0.0011746	2.40244
17775226	0.00117507	1.49192	0.000261648	1.58331
17826263	0.00118286	-2.00954
17688048	0.00118346	-1.20131
17769537	0.00118592	-1.76495
17657180	0.0011875	1.38289	0.000282798	1.44817
17877200	0.00119065	2.16303
17778971	0.00119366	1.88707
17651251	0.00120635	1.37172	9.26253e-08	1.81964
17878568	0.00120865	-1.32296
17747217	0.00121443	1.53255
17880752	0.00122526	1.70894	0.000145464	1.91274
17696403	0.00123369	2.09291
17654535	0.00123503	1.46121
17612006	0.0012373	1.47518
17853660	0.00124057	1.90331
17604279	0.00124171	-1.87371
17786038	0.00124632	-1.20737
17622875	0.00124739	1.29335
17627604	0.00125047	-1.35222
17654574	0.00125222	1.38772
17613048	0.00125412	1.50552
17721140	0.00125593	1.75039	6.38459e-05	2.06127
17671538	0.00125713	2.0155
17820577	0.00126535	-1.75593
17611148	0.00126906	-1.19036	4.68805e-05	-1.25921
17867829	0.00127279	1.5541
17818617	0.00127331	-1.18237	0.000293959	-1.21178
17818633	0.00127331	-1.18237	0.000293959	-1.21178
17875220	0.00127377	1.42422
17737314	0.00127498	-1.41512	0.000411941	-1.47206
17878405	0.00127849	1.79114	4.06928e-05	2.18001
17766331	0.00127986	1.38944	0.000471709	1.4362
17696434	0.00128733	1.25784	4.04475e-05	1.35944
17792094	0.00129399	-1.32366
17839326	0.00129411	-1.36888	2.64612e-05	-1.54207
17883510	0.00129637	-2.00629	0.000120083	-2.36418
17693872	0.0012965	-1.37666
17600943	0.00130571	-1.63809
17601277	0.00130571	-1.63809
17716088	0.00131018	-1.29079
17880766	0.00131127	1.70525	0.000189011	1.89055
17739540	0.00131312	-1.29082
17619464	0.0013139	2.74085
17602427	0.00131657	-2.59263
17857034	0.00132108	-1.67174
17727602	0.00132405	-1.24061
17628455	0.00132914	2.24055
17718862	0.00133305	1.3487	0.000944836	1.36301
17680867	0.00134344	1.26885
17766333	0.00134642	2.27585
17660414	0.00135016	1.87585
17615647	0.00135313	2.0347
17638571	0.00135922	-1.40162
17865389	0.00136008	1.78517
17763373	0.00136416	-1.44939
17772646	0.00136469	1.43259
17880377	0.00136704	1.26515
17603269	0.00137219	-2.09153	0.000592072	-2.22819
17846335	0.00137914	2.00247
17692024	0.001381	1.80593
17879671	0.00138815	-1.37677
17815433	0.0013942	1.42843
17873398	0.00139448	1.60628
17635606	0.00139609	2.11394
17661316	0.001398	1.30932
17616926	0.00140218	1.77785
17859277	0.0014041	1.60722
17700634	0.00141206	-1.5054
17661205	0.0014221	-1.3653	0.00117139	-1.37388
17616061	0.00142351	1.36417
17799590	0.00142677	-1.49761
17601603	0.0014279	-1.37634
17682147			1.2735e-07	1.80844
17621031			3.81692e-07	1.76576
17789560			3.9139e-07	1.38374
17842254			5.74413e-07	-1.65812
17679284			7.83526e-07	-2.01346
17882131			1.02786e-06	2.28642
17805170			1.16225e-06	-2.00046
17636377			1.32826e-06	-1.67779
17656679			1.67125e-06	2.39421
17761961			2.46109e-06	-1.26279
17717352			2.49939e-06	1.34867
17704851			2.53505e-06	-1.88541
17825888			2.6591e-06	1.81511
17755090			2.87911e-06	-1.5086
17744400			3.23276e-06	2.0842
17690672			3.43018e-06	2.46139
17701680			4.22048e-06	1.62859
17649803			5.61144e-06	1.73248
17780805			6.26143e-06	1.44794
17739778			6.73222e-06	1.90593
17636380			6.87037e-06	-1.77516
17807008			7.84103e-06	1.80817
17787711			1.04816e-05	1.45346
17881036			1.05598e-05	1.72651
17742972			1.07073e-05	1.48781
17677689			1.09404e-05	1.4831
17772385			1.18796e-05	-2.24831
17812164			1.2245e-05	1.5727
17883262			1.25129e-05	-1.12785
17707089			1.35472e-05	1.43457
17683352			1.60117e-05	1.43004
17819266			1.65333e-05	1.60394
17741105			1.72345e-05	1.3012
17659050			1.72623e-05	2.07359
17747619			1.78233e-05	-1.29939
17714789			1.82657e-05	1.5707
17641358			1.88855e-05	1.24635
17876613			1.88855e-05	1.24635
17610582			1.95845e-05	2.41493
17767938			1.9947e-05	1.26286
17864938			2.03747e-05	1.30135
17844417			2.06596e-05	-1.52808
17783738			2.12676e-05	1.51454
17718628			2.17917e-05	1.96696
17687717			2.22144e-05	2.0186
17773119			2.2999e-05	2.63651
17810115			2.31028e-05	1.68891
17801259			2.38973e-05	1.66058
17729655			2.4334e-05	-2.30923
17669104			2.57497e-05	-2.10779
17621999			2.70597e-05	-1.27705
17873698			2.85494e-05	-1.41412
17881843			2.86752e-05	-1.46429
17627860			2.94907e-05	-1.52542
17808766			2.97516e-05	-1.71921
17756409			3.04862e-05	1.47242
17882321			3.15843e-05	1.9861
17713749			3.16335e-05	1.52472
17757148			3.19582e-05	-1.47677
17883260			3.3055e-05	-1.12198
17766336			3.55051e-05	1.85824
17703572			3.57259e-05	-1.36172
17655403			3.57527e-05	-1.48223
17713887			3.6076e-05	2.03993
17617562			3.62592e-05	1.74247
17773220			3.71205e-05	1.45148
17679501			4.04796e-05	-1.93073
17883258			4.18075e-05	-1.11994
17881012			4.30756e-05	1.65149
17669851			4.36048e-05	-1.78523
17784395			4.36944e-05	1.33141
17862210			4.39354e-05	-1.62517
17874787			4.41461e-05	-1.89132
17775340			4.43357e-05	1.40875
17762885			4.44306e-05	-1.38694
17883264			4.46276e-05	-1.11909
17611337			4.53395e-05	-1.35024
17640110			4.59796e-05	1.43633
17750311			4.65499e-05	1.83053
17615226			4.89644e-05	1.4476
17633619			4.89649e-05	-1.33348
17633891			5.14003e-05	-2.16862
17791495			5.18609e-05	1.4909
17835452			5.27171e-05	-1.27968
17756175			5.30408e-05	-2.42719
17731393			5.39893e-05	-1.19364
17758543			5.41112e-05	1.73131
17833198			5.41706e-05	-1.38624
17881641			5.43117e-05	1.55328
17830523			5.66062e-05	1.58698
17838120			5.68193e-05	-1.95321
17673258			5.73135e-05	-1.35784
17872328			5.82395e-05	-1.21967
17717113			6.13764e-05	1.5472
17833152			6.18371e-05	1.63265
17612870			6.26054e-05	-1.61909
17699963			6.4359e-05	1.45214
17787139			6.48157e-05	-1.35666
17708080			6.52251e-05	1.35827
17883266			6.5705e-05	-1.11971
17675690			6.66556e-05	1.28132
17873791			7.52124e-05	-1.37822
17783706			7.63598e-05	1.77799
17607753			7.73294e-05	2.4869
17609171			7.73294e-05	2.4869
17749608			7.75591e-05	1.97728
17762017			7.91702e-05	-1.38415
17711894			7.99633e-05	-1.24675
17634196			8.26534e-05	2.09028
17883670			8.36572e-05	-1.21691
17718686			8.48448e-05	1.54665
17674232			8.52384e-05	1.70929
17752459			8.58724e-05	1.77435
17618317			8.92307e-05	-1.43757
17701728			9.06985e-05	-1.26206
17683752			9.20221e-05	-1.44478
17883270			9.44409e-05	-1.12438
17830366			9.46376e-05	1.51758
17881955			9.55658e-05	1.85331
17667929			9.56977e-05	1.55572
17711649			9.70754e-05	-1.19882
17636301			9.78386e-05	-1.90188
17636302			9.78386e-05	-1.90188
17607045			9.83958e-05	-1.6804
17824511			9.86797e-05	-1.50216
17792586			0.000103151	1.45427
17876453			0.000107066	1.64836
17756153			0.000110134	-2.20335
17840441			0.000112449	-2.02343
17656347			0.000113829	1.26657
17876268			0.000114288	-1.77376
17665122			0.000114469	-1.42579
17634240			0.000114472	-1.38275
17665170			0.000116296	1.64302
17693966			0.00011905	1.41407
17663335			0.000119127	1.5585
17759484			0.000119571	1.77139
17769169			0.000122265	1.80123
17602397			0.000122563	3.14455
17754014			0.000126029	1.50247
17613493			0.000127869	-1.31756
17881507			0.000128732	-1.21542
17854002			0.000138486	-2.0114
17618138			0.000139055	-1.87299
17829702			0.000139217	-1.35869
17697484			0.000139879	1.27812
17607939			0.000141605	-1.87799
17857310			0.000144348	-1.90495
17744878			0.000147823	1.81482
17802591			0.000153955	1.27425
17648071			0.000160062	1.46819
17875372			0.00016244	-1.23607
17756795			0.000166014	1.55778
17679008			0.000167811	-1.30629
17817434			0.000168527	1.43468
17684505			0.000171183	1.99956
17656469			0.000173553	-1.79926
17739289			0.00017416	-1.72249
17700148			0.000174278	1.29186
17602453			0.000174491	-1.81503
17702319			0.000175343	-1.44018
17736048			0.000176434	-1.41436
17810521			0.000177532	1.96197
17755970			0.000178223	-2.00001
17605947			0.000178379	-2.22144
17715828			0.00017843	1.99664
17793003			0.000179283	1.55605
17764652			0.000182211	-1.55462
17627864			0.000183477	1.86727
17604149			0.00018377	-2.0225
17828431			0.000184262	-1.63144
17632692			0.000184828	1.52848
17727390			0.000188082	-1.43914
17648607			0.000200213	1.28262
17612802			0.000204225	-1.37269
17640505			0.000212739	-1.9986
17628084			0.000216596	1.66292
17725351			0.000220196	1.54039
17879635			0.000220304	-1.21154
17651958			0.000223443	1.63471
17601803			0.000223886	1.92724
17781623			0.000227523	-1.29012
17605889			0.000227548	-1.96748
17733382			0.000230179	1.24274
17676856			0.000231797	-1.95883
17879735			0.000233235	-1.48058
17659325			0.000234738	-1.40941
17827745			0.000236707	1.84806
17604419			0.000237787	-2.01591
17811536			0.000239619	1.41246
17790666			0.000241743	1.94961
17782470			0.000242255	-1.14502
17827785			0.000243301	1.46801
17713739			0.000247496	1.42293
17718735			0.000248209	-1.37019
17632158			0.00025139	1.32626
17848007			0.000257655	1.56838
17689947			0.000259035	-1.46624
17718914			0.000259116	1.47395
17811254			0.000259647	1.53775
17800736			0.00026077	1.61642
17666865			0.000262674	1.751
17637216			0.000262957	-1.57196
17764250			0.000275297	1.67916
17874091			0.000278484	-1.17066
17811583			0.00027852	2.17888
17843465			0.000285095	-3.10921
17882547			0.000288913	-1.33857
17882627			0.000296002	1.29752
17642380			0.000298567	1.95414
17684704			0.00030609	1.70405
17802896			0.000307466	3.75117
17712135			0.000307724	1.32426
17726360			0.000312289	-1.23592
17881531			0.000312918	1.99301
17883256			0.000313462	-1.1145
17667435			0.000314241	-1.34577
17865538			0.000314288	-1.24977
17626997			0.000315189	-1.23727
17629100			0.000315361	-1.29529
17807036			0.000318099	-1.45351
17832399			0.000318382	-1.25727
17832400			0.000318382	-1.25727
17691634			0.000318796	-1.25728
17607823			0.000326545	-2.0319
17607875			0.000326545	-2.0319
17744520			0.000328934	1.68081
17883312			0.000331506	-2.67676
17623013			0.000333537	2.52249
17819850			0.000335369	-1.48083
17662976			0.00033764	1.44243
17663208			0.000341025	1.46612
17686565			0.000346207	2.46998
17690182			0.000350801	-3.11187
17881034			0.000351543	-1.73003
17643379			0.000354523	-1.31671
17746478			0.000355755	-1.44817
17883524			0.000358392	-3.01224
17811640			0.000359013	1.9638
17861663			0.000364202	-1.41845
17719531			0.000370475	1.72207
17608239			0.000370756	2.18517
17712099			0.000376537	-2.49626
17877800			0.000383248	1.29494
17613434			0.000395755	-1.35824
17656487			0.000395989	-1.3254
17839529			0.000398113	1.58598
17823328			0.00039987	1.49692
17729144			0.000401548	1.47043
17759050			0.000402902	1.47926
17799094			0.000405122	-1.29812
17806272			0.000411736	-1.3838
17767253			0.000412305	1.61727
17862682			0.000415034	1.6123
17802971			0.000418816	1.3234
17838415			0.00042017	1.61501
17659849			0.000421426	-1.34392
17801863			0.000426285	2.48013
17718750			0.000435986	1.30615
17707725			0.000436275	-1.89652
17829081			0.000439593	-1.54621
17763636			0.000440408	-1.22856
17871130			0.000442676	-1.51516
17745566			0.000443508	1.54759
17608545			0.00044495	-1.81394
17639337			0.000447071	-1.40529
17755916			0.000459229	-1.3278
17714162			0.000463154	1.37267
17879688			0.000466486	-1.16439
17603065			0.000466983	1.86661
17807347			0.000467042	-1.33205
17621907			0.00047111	-1.5447
17883268			0.000473554	-1.10666
17877504			0.000476696	-1.49931
17881150			0.000483344	1.82472
17809806			0.000486499	-1.43672
17730182			0.00048718	1.9396
17603421			0.000492739	-2.0225
17605825			0.000493045	-2.38376
17880263			0.000497558	-1.46154
17880269			0.000497558	-1.46154
17665255			0.000499278	1.6956
17883308			0.000510285	-2.61657
17602027			0.000512079	-2.12074
17725458			0.000512424	-1.248
17616697			0.000514354	2.04679
17604221			0.000514404	-2.39192
17811248			0.00051661	1.2671
17640310			0.000518316	1.49187
17712173			0.000528634	-1.90808
17716638			0.000531944	-1.38329
17681886			0.00053245	-2.3569
17881455			0.000536238	-1.37275
17686658			0.000537191	1.23398
17810932			0.000539039	1.28593
17603537			0.000542498	-1.81572
17613262			0.000545368	-1.28565
17766334			0.000546636	1.61443
17856942			0.000554439	1.93733
17880191			0.000556335	1.33642
17880426			0.000560958	1.59791
17881541			0.000560958	1.59791
17881729			0.000560958	1.59791
17692976			0.000563774	-1.66491
17609565			0.000563964	-1.94141
17817436			0.000571428	1.94565
17638220			0.000576538	1.75609
17719495			0.000577913	2.30611
17829661			0.000580125	1.40953
17821251			0.000581501	1.53397
17682367			0.00058278	1.36419
17698310			0.000584156	-1.23973
17642375			0.00059273	1.5494
17655779			0.000593662	1.50913
17607105			0.000594567	-2.21204
17797843			0.000596432	1.69356
17843357			0.000605706	-1.34963
17600341			0.00060776	-1.59061
17840257			0.000609306	-1.57029
17634007			0.000609796	-1.41548
17805260			0.000610073	-1.3886
17873453			0.000614181	-1.3024
17630332			0.000622351	1.88351
17723091			0.000624455	-1.57227
17644874			0.000629781	-3.01031
17881070			0.000630603	1.59043
17685756			0.000631456	-1.28076
17600563			0.000632271	-1.52717
17610077			0.000632271	-1.52717
17784153			0.000632338	1.18988
17826270			0.000637276	-1.72286
17656263			0.000637922	-1.34178
17880882			0.000641008	1.41113
17754686			0.000651801	-1.38889
17883618			0.000653055	-2.62723
17646428			0.000653621	1.28193
17832492			0.000655353	-1.40897
17793760			0.000666758	1.94086
17659747			0.000678591	1.84174
17747774			0.000680441	-1.2687
17693302			0.000681949	1.46348
17693126			0.000683468	-1.41094
17842951			0.000694056	-1.21145
17821733			0.000694598	-1.20246
17788778			0.000699071	1.28953
17777993			0.000700547	1.59993
17749555			0.000704154	-1.64563
17882891			0.000710287	-1.57336
17763744			0.000710697	-1.29883
17622474			0.000713418	1.61866
17610283			0.000717089	-2.56025
17834129			0.000717901	-1.4281
17608817			0.00072624	-1.7751
17806012			0.000727859	1.3175
17770560			0.000732176	1.58377
17680257			0.000732646	-1.35097
17725000			0.000736112	-1.54227
17758156			0.000737298	-1.14387
17834018			0.000737925	-1.44993
17813579			0.000742855	-2.27248
17836379			0.00074494	1.35616
17722825			0.000749524	-1.65035
17879695			0.000749957	1.97588
17816890			0.000752135	1.89026
17871269			0.000757576	-1.33714
17658487			0.000757784	-1.36701
17694809			0.000761358	-1.34574
17622069			0.000763177	-1.20759
17791827			0.000766068	1.65525
17832476			0.000766828	-2.95761
17743841			0.000769647	-1.40834
17625170			0.000774989	1.67569
17600637			0.000777463	-1.5525
17610151			0.000777463	-1.5525
17687355			0.000779643	-1.56964
17691169			0.000780052	-1.30538
17665023			0.000782378	-1.38651
17737614			0.000792641	-1.4676
17790019			0.000793314	-1.18639
17661112			0.000795591	-1.58873
17859672			0.000798734	-1.5645
17853637			0.00081544	1.50693
17602501			0.000819286	-1.8017
17858449			0.000819298	-1.3081
17823498			0.000820677	-2.44221
17879840			0.000822104	-1.35304
17829222			0.000823544	-1.23201
17752759			0.000823833	1.76389
17602739			0.000825947	1.66325
17806027			0.000830751	-1.66526
17883536			0.000833584	-2.74219
17811636			0.000836676	1.76167
17658309			0.000837575	-1.62277
17817776			0.00083818	-1.42204
17603293			0.000843122	-1.68365
17786945			0.000844399	1.64184
17883716			0.000844477	-2.65698
17666704			0.000847259	1.60037
17880279			0.00085603	1.38387
17782466			0.000857558	-1.38673
17814787			0.000865377	-1.30346
17855688			0.000876194	1.31315
17760337			0.00087999	1.23803
17602493			0.000881027	-1.92923
17737761			0.000884469	-1.31634
17715487			0.000884809	2.00911
17734724			0.000886369	-1.83383
17870602			0.000887932	1.41223
17602455			0.00089693	-2.23874
17649130			0.000899125	-1.69515
17645033			0.000903067	-1.29643
17709090			0.000905324	-1.27958
17698454			0.00090711	-1.29457
17806773			0.00090759	-1.3479
17606549			0.000910393	-1.55696
17828341			0.000918109	1.60019
17696724			0.00091881	-1.4039
17832749			0.000924074	1.548
17605433			0.000924337	-1.91784
17728240			0.000926098	-1.42513
17722658			0.000930208	-1.35477
17863640			0.00094675	1.48755
17756649			0.000947248	-1.47111
17714504			0.000949946	1.32596
17778754			0.000949946	-1.61146
17654902			0.000950203	-1.36757
17721946			0.000952106	-1.47312
17611290			0.000956651	1.41625
17604697			0.000956821	1.85751
17827987			0.000961875	-1.80164
17699020			0.000965159	1.96621
17715499			0.000965316	-1.19062
17871354			0.000970423	1.45657
17671634			0.000973824	1.35128
17698246			0.000975535	-1.33325
17698480			0.000975535	-1.33325
17649103			0.000975579	-1.76766
17882485			0.000987409	1.43408
17645668			0.000997892	1.49279
17641742			0.000999455	-1.31762
17626974			0.00100345	-1.19138
17710636			0.00100672	1.31251
17882143			0.00101123	1.35961
17628319			0.00101953	1.42216
17603973			0.00102114	-1.73986
17883548			0.00102209	-2.54993
17774882			0.00103443	1.50326
17642377			0.00103834	1.49282
17719725			0.00103999	-1.20738
17649376			0.00104264	1.28197
17762116			0.0010478	-1.31791
17796936			0.00104928	-1.21408
17605861			0.00105172	-2.23295
17677975			0.00105345	1.24933
17640358			0.00106756	-1.42662
17737735			0.00107227	1.36842
17655655			0.00107332	1.7249
17784321			0.00107349	-1.26672
17866121			0.00107958	1.35077
17881006			0.00107962	-1.24503
17694344			0.00108968	-1.39508
17774354			0.00109334	-1.19313
17793055			0.00109773	1.57214
17749620			0.00110032	1.92368
17686962			0.00110341	-1.28518
17785528			0.00110594	1.32356
17648002			0.00110958	1.41248
17768916			0.00111264	1.33448
17697355			0.00111583	-1.73026
17605517			0.00112106	-1.81595
17792446			0.00112106	-1.25644
17752253			0.00112783	-1.28542
17619858			0.00112809	-1.50642
17751520			0.00113003	-1.31042
17798266			0.00113226	1.34686
17806624			0.00113432	1.54062
17697458			0.00114047	1.75312
17812305			0.00114255	-1.34079
17603245			0.00115712	-1.74573
17602503			0.00115929	-2.49793
17639552			0.0011607	1.29261
17601765			0.00116077	-2.32533
17842119			0.00116415	1.4323
17686592			0.00116758	1.54736
17603255			0.00117731	-2.55601
17686163			0.00117785	1.41493
17624220			0.00118062	-1.3051
17766447			0.00118159	-1.32927
17764236			0.001183	-1.64461
17792120			0.00118388	-1.27829
17881128			0.00118453	1.42813
17711637			0.00118553	-1.19977
17797728			0.00118607	-1.38442
17700807			0.00118725	-1.65541
17789430			0.00119256	1.55392
17797969			0.00120333	-1.21294
17746020			0.00121184	-1.18144
17880521			0.00121347	1.46332
17878581			0.00121634	-1.33387
17658722			0.00122597	1.33841
17716254			0.00122866	-1.19726
17873566			0.00122981	1.29633
17747916			0.00123631	-1.40087
17657767			0.00124225	1.5479
17615164			0.00125485	-1.39532
17617817			0.00126101	1.5171
17736025			0.00127179	1.34853
17844512			0.00127245	1.61615
17735104			0.00127308	1.46856
17682112			0.00127599	-1.45193
17883552			0.00127873	-2.41805
17606019			0.00128105	-1.72008
17639434			0.00129003	-1.33818
17625347			0.00130784	-1.8863
17641698			0.00131028	-1.66245
17724555			0.00131098	-1.34651
17843057			0.00131284	-1.27647
17739279			0.00132312	-1.1785
17743238			0.00132421	-1.30943
17701751			0.00132666	1.40944
17877129			0.00132666	1.40944
17858103			0.00133131	-1.5878
17883508			0.00134175	-2.47839
17804588			0.00134425	-1.30623
17609339			0.00135046	-2.11136
17633204			0.00135094	-1.43185

## Sheet: TableS5e
Column ID	p-value(SHR * WAT * CTL vs. SHR * WAT * PROG)	Fold-Change(SHR * WAT * PROG vs. SHR * WAT * CTL)	p-value(PLZF * WAT * CTL vs. PLZF * WAT * PROG)	Fold-Change(PLZF * WAT * PROG vs . PLZF * WAT * CTL)
17867332	2.16304e-13	10.1839	1.07864e-09	5.33647
17768109	1.84102e-12	5.32841	5.64947e-10	3.81747
17750311	6.58345e-12	3.68244	3.38267e-10	3.05736
17883183	6.7782e-12	5.57111	1.95966e-08	3.44098
17663335	1.287e-11	2.71972	2.54859e-06	1.77467
17802604	1.35819e-11	2.7985	1.01369e-11	2.83079
17675097	9.62064e-11	3.84565	1.23779e-12	4.89664
17686592	1.13723e-10	3.0236	7.56105e-13	3.80865
17811631	1.1983e-10	3.82971	4.8186e-12	4.57048
17707089	1.68329e-10	1.87921	6.65087e-13	2.17734
17753145	1.8453e-10	2.46562	2.59015e-09	2.24387
17656347	5.12459e-10	1.58238
17753138	5.4417e-10	2.69956	2.89056e-06	1.92611
17832774	5.46018e-10	2.13874	8.94846e-07	1.70981
17867336	7.69803e-10	11.0029	2.98374e-08	7.68675
17883197	9.66356e-10	10.8826	5.0014e-08	7.38784
17883213	1.04653e-09	11.8382	3.20547e-08	8.34642
17784153	1.3993e-09	1.45414	5.23567e-07	1.32699
17809643	3.26823e-09	3.76435	2.01262e-05	2.30794
17697660	3.66197e-09	2.85422	8.71434e-11	3.40438
17862210	3.93165e-09	-2.23827	0.000346454	-1.51135
17831028	4.39621e-09	-2.62709	0.000296676	-1.65574
17714162	4.43805e-09	1.87882	0.000311421	1.3882
17648894	4.9827e-09	3.68327	4.67736e-08	3.2418
17618127	6.15999e-09	2.90943	1.82513e-07	2.48262
17630332	6.65777e-09	3.568	4.06569e-08	3.22246
17655779	6.74534e-09	2.27661	2.128e-06	1.85145
17701129	7.52151e-09	-2.59658	6.69439e-05	-1.77557
17670118	1.238e-08	7.67767	6.57405e-07	5.3376
17624156	1.35076e-08	3.73156	1.01024e-06	2.88948
17791215	1.36503e-08	2.09486
17880082	1.37121e-08	3.45294	1.06611e-06	2.70815
17819187	1.45989e-08	2.46203	3.78871e-09	2.60436
17740865	1.65812e-08	2.99519	4.56372e-07	2.53842
17829035	1.7382e-08	2.08369	8.97554e-06	1.69243
17816993	1.77107e-08	5.66285
17635403	1.95655e-08	2.73336	8.63997e-07	2.29634
17723306	2.24358e-08	1.4724	8.53731e-07	1.38005
17760349	2.29298e-08	2.57135	6.71176e-05	1.81822
17721550	2.36451e-08	-1.85845
17659050	2.42219e-08	2.84397	6.3706e-08	2.71324
17786945	2.43922e-08	2.62839	3.58686e-08	2.58305
17700898	2.91518e-08	-1.66049	2.54182e-05	-1.41592
17803496	3.3362e-08	3.19486	3.30967e-07	2.81925
17641358	4.45684e-08	1.36135
17876613	4.45684e-08	1.36135
17657978	4.91128e-08	-2.94653	0.000160072	-1.9413
17782128	5.04279e-08	-2.10136
17797868	5.19406e-08	-2.25352	0.00155421	-1.50118
17752111	5.28037e-08	2.64575	1.94952e-07	2.48929
17880571	5.62061e-08	1.7319	4.73929e-06	1.54158
17667792	5.65458e-08	1.60912	3.99192e-08	1.62207
17839529	5.92995e-08	2.23401	5.78218e-07	2.04584
17782065	6.23157e-08	1.65718	4.69983e-11	1.9912
17875933	8.11126e-08	2.59282	1.46695e-09	3.13896
17867324	1.06385e-07	11.3978	1.63234e-05	6.2339
17783436	1.08679e-07	2.17957
17646715	1.09098e-07	3.66524	5.18959e-10	5.22286
17683509	1.0929e-07	3.04346	8.03377e-06	2.40405
17883173	1.09793e-07	3.38724	0.000261559	2.11305
17657767	1.20012e-07	2.2691	7.01443e-08	2.31954
17756767	1.20375e-07	2.31067	1.55241e-07	2.28627
17671751	1.31071e-07	2.22603	3.48392e-05	1.78179
17880426	1.35015e-07	2.24579	0.000160145	1.68522
17881541	1.35015e-07	2.24579	0.000160145	1.68522
17881729	1.35015e-07	2.24579	0.000160145	1.68522
17678629	1.35879e-07	2.22583	7.47303e-06	1.89717
17872081	1.39753e-07	2.97661	4.38193e-07	2.79658
17794897	1.42971e-07	2.60243	1.61706e-08	2.89234
17850167	1.4391e-07	1.72029	1.59667e-12	2.4007
17740982	1.52632e-07	2.56516	2.77573e-07	2.49347
17716119	1.54502e-07	2.69303	5.83668e-07	2.52059
17766355	1.6307e-07	-1.73441
17830938	1.64853e-07	-2.58495	1.43818e-09	-3.26163
17696859	1.77565e-07	2.1053	0.000312429	1.58509
17752113	1.79191e-07	4.76058	0.00106008	2.36946
17844646	2.17724e-07	2.50195	2.93308e-05	1.98844
17881403	2.23834e-07	3.26649	1.09229e-05	2.58217
17883566	2.415e-07	-3.58741	6.53124e-05	-2.48241
17748416	2.62936e-07	4.47136	0.000980312	2.34205
17756795	2.68678e-07	1.9453	4.2565e-05	1.63428
17811243	2.71189e-07	2.00551	3.04861e-05	1.69233
17641621	2.72758e-07	6.26442
17747605	2.76601e-07	1.71646	6.83856e-07	1.67362
17861074	2.77241e-07	1.68335	9.7284e-06	1.52976
17618929	2.81649e-07	-1.66575
17780608	2.8267e-07	-1.76555
17684704	3.21857e-07	2.30247	0.000175868	1.74749
17746200	3.23656e-07	4.87263	4.8558e-10	8.46513
17699417	3.30225e-07	-2.5783	0.00170947	-1.67251
17845272	3.35762e-07	-2.40016	1.37352e-05	-2.02593
17651087	3.36561e-07	2.55421
17760347	3.37415e-07	4.7057	0.000100068	2.96326
17880835	3.42662e-07	1.87999	1.9254e-08	2.06931
17768916	3.45874e-07	1.66024	7.20798e-06	1.53201
17806027	3.47908e-07	-2.38768
17883514	3.56293e-07	-3.58665	5.82545e-08	-4.05137
17736025	3.76398e-07	1.69928	0.0010163	1.3578
17867251	3.9022e-07	2.49305
17681948	3.91002e-07	1.88693	9.4411e-05	1.56957
17876099	3.9204e-07	2.8451	4.7235e-06	2.48151
17727073	3.97128e-07	1.97969	2.54377e-06	1.85198
17865351	4.00539e-07	-2.77386
17734805	4.21587e-07	4.57555	0.00383305	2.14438
17676796	4.24724e-07	1.95849	1.36705e-05	1.73143
17882485	4.35679e-07	1.85593	1.23185e-05	1.66383
17686875	4.5452e-07	2.37457
17615249	4.55003e-07	2.90132	7.08013e-08	3.22448
17883564	4.73769e-07	-3.76284	2.72124e-07	-3.91286
17829158	4.86112e-07	1.94985
17752880	4.87796e-07	5.80457	6.32804e-06	4.56807
17808333	5.25572e-07	-2.11313	4.82997e-07	-2.12028
17679910	5.26334e-07	2.7108	2.48297e-06	2.49605
17677975	5.26844e-07	1.46292	1.93977e-08	1.56546
17757621	5.36435e-07	2.20511	0.00131614	1.57276
17741684	5.46875e-07	-2.20376	2.04657e-05	-1.89054
17669111	5.71979e-07	1.8621	5.48736e-09	2.17933
17766597	5.84837e-07	-1.62372	7.29709e-09	-1.82287
17631196	6.23461e-07	1.3535	4.48907e-06	1.31065
17674934	6.44574e-07	3.05703	6.04765e-07	3.06881
17674936	6.44574e-07	3.05703	6.04765e-07	3.06881
17674938	6.44574e-07	3.05703	6.04765e-07	3.06881
17882811	6.44574e-07	3.05703	6.04765e-07	3.06881
17882813	6.44574e-07	3.05703	6.04765e-07	3.06881
17882815	6.44574e-07	3.05703	6.04765e-07	3.06881
17642584	6.67383e-07	-2.06907	0.000341368	-1.61368
17612922	6.95071e-07	6.18966
17659395	7.29306e-07	3.01443	9.45569e-05	2.24759
17753249	7.43399e-07	1.49494	2.1468e-09	1.70306
17752878	7.55419e-07	3.26952	3.05824e-07	3.46609
17671207	7.92515e-07	3.25777	5.64807e-09	4.50101
17822845	8.04286e-07	2.95403
17766252	8.15259e-07	4.67235	6.48293e-07	4.76345
17819378	8.50471e-07	5.23565
17706980	9.10203e-07	1.96277	3.30196e-05	1.71739
17827561	9.38077e-07	1.54266	0.000196569	1.35593
17713337	9.48713e-07	2.92954	0.00158247	1.86405
17674965	1.01519e-06	4.56583	4.26479e-08	5.96834
17649130	1.04228e-06	-2.35275	1.32308e-05	-2.0856
17852833	1.04345e-06	1.80077
17657791	1.0608e-06	2.35349	1.88409e-08	2.85443
17883512	1.06359e-06	-3.11217	9.86471e-07	-3.12694
17727409	1.0711e-06	2.30054	9.49383e-06	2.0798
17795965	1.08697e-06	2.23524
17839036	1.09582e-06	1.69836	2.43859e-09	2.03915
17699453	1.09721e-06	2.14244	9.96565e-06	1.95136
17728036	1.11355e-06	2.19462
17854154	1.11427e-06	1.21232	0.00125864	1.12217
17677689	1.11721e-06	1.57057	9.6314e-05	1.40315
17671657	1.14827e-06	-1.81904	0.000195577	-1.52981
17782466	1.17662e-06	-1.68885
17736120	1.20215e-06	2.31994	0.000182359	1.82749
17689947	1.20464e-06	-1.73294	0.00343418	-1.34431
17881120	1.20687e-06	1.69368	4.13476e-06	1.63345
17656188	1.24815e-06	-2.4167	0.00180693	-1.66827
17638626	1.27237e-06	2.67917
17661411	1.33345e-06	1.54529
17708162	1.36749e-06	2.43304	4.96805e-05	2.03116
17742173	1.44221e-06	-1.86798
17744063	1.44886e-06	1.91933	1.98056e-08	2.25045
17786577	1.48746e-06	-2.22866	7.45327e-05	-1.8644
17837146	1.49437e-06	2.52907	0.00205265	1.70937
17846515	1.53206e-06	1.79662	1.09453e-05	1.68313
17874930	1.57242e-06	2.67325	0.000388638	1.95598
17795399	1.62711e-06	2.94627	1.25473e-05	2.59882
17796902	1.64795e-06	1.61016	0.000140706	1.42573
17751327	1.67072e-06	1.80625
17658124	1.67601e-06	2.34979
17622746	1.78836e-06	1.94519	0.00128361	1.50418
17864938	1.89864e-06	1.35658
17657331	1.94544e-06	-1.71462
17769015	1.9693e-06	2.77791	5.90203e-07	2.98129
17844986	1.97582e-06	3.33535	2.28495e-06	3.30201
17678140	1.98534e-06	1.60055
17779880	1.98833e-06	1.72328	2.05841e-06	1.72141
17829493	2.0051e-06	-1.88285
17883003	2.0051e-06	-1.88285
17801541	2.00713e-06	1.60706	5.49023e-05	1.4676
17749583	2.09828e-06	1.70811	0.000385686	1.45006
17882627	2.17193e-06	1.44196	1.37612e-05	1.38669
17627635	2.21553e-06	1.67357	7.85533e-05	1.50364
17823942	2.30071e-06	2.27673	2.60683e-09	3.16132
17612006	2.3819e-06	1.86066	2.3675e-09	2.39658
17766258	2.41976e-06	3.38249
17622590	2.45322e-06	1.68868
17745564	2.49696e-06	2.94637
17883568	2.55465e-06	-3.90722	1.85587e-05	-3.33641
17856785	2.56232e-06	2.75876
17882823	2.62121e-06	4.6091	2.67209e-08	6.95515
17657180	2.67004e-06	1.66891	0.000216734	1.46032
17675690	2.76617e-06	1.3569
17883510	2.80787e-06	-3.02439	7.28647e-06	-2.84289
17725568	2.86038e-06	2.99853	5.86958e-06	2.86279
17742873	2.98215e-06	1.97009	0.0019885	1.50552
17729561	3.13449e-06	1.49486	2.32486e-09	1.77807
17844538	3.15166e-06	-1.80478
17717183	3.18761e-06	2.25994	3.48251e-06	2.25034
17684937	3.216e-06	1.70309	2.59784e-05	1.59433
17681329	3.24303e-06	2.28423
17623683	3.37081e-06	1.58766
17693966	3.40522e-06	1.55319	6.91603e-05	1.43484
17698109	3.41899e-06	1.61547
17790889	3.44362e-06	1.64907
17681327	3.51923e-06	3.81604	1.45123e-05	3.4084
17811636	3.60141e-06	2.33735	3.31782e-07	2.63645
17613658	3.62536e-06	1.74512	2.40184e-05	1.63872
17879815	3.70281e-06	2.48119	0.000245791	1.96953
17687717	3.70287e-06	2.19614	0.000703158	1.70641
17735015	3.77587e-06	1.49574	0.000146386	1.36838
17772095	3.78927e-06	1.3571	1.27712e-06	1.38423
17723614	3.81068e-06	2.49598	0.00016241	2.02792
17752759	3.86405e-06	2.33049	1.05512e-05	2.21494
17622570	3.87877e-06	-2.65165
17679961	3.91909e-06	1.74861	0.000190231	1.53291
17740089	3.94826e-06	1.86169	5.62526e-09	2.38146
17847298	3.97127e-06	1.81916	1.22994e-07	2.06051
17841802	3.97418e-06	2.38536
17633601	4.05094e-06	-3.56495	5.03806e-07	-4.17785
17749620	4.06761e-06	2.71962	4.59893e-07	3.0991
17852378	4.1789e-06	1.89928
17802707	4.2015e-06	1.4428	0.00176989	1.25685
17712294	4.27422e-06	1.86687	7.979e-06	1.8236
17861862	4.33499e-06	5.16957	5.7376e-08	7.9361
17627889	4.38088e-06	-1.73817
17713739	4.44506e-06	1.59683	0.000441421	1.39862
17623679	4.47647e-06	2.7681	0.000624562	2.02863
17872770	4.57794e-06	2.91306	0.00104285	2.02983
17718992	4.77001e-06	2.09734	2.71576e-06	2.15094
17833734	4.96609e-06	2.10873	8.66972e-05	1.8502
17717352	5.15723e-06	1.33177	1.76696e-08	1.47105
17811536	5.25786e-06	1.57202
17873337	5.28433e-06	1.65547	0.000225721	1.47235
17786952	5.30132e-06	2.48476	0.000108047	2.09814
17650742	5.41035e-06	1.64105	1.05861e-08	1.98406
17665981	5.5162e-06	3.10148	1.32794e-05	2.91831
17829405	5.55031e-06	1.77673	3.7225e-05	1.66118
17872257	5.7341e-06	2.42023	0.00015761	2.0177
17883562	5.86106e-06	-3.57825	0.000135383	-2.79036
17822464	5.89478e-06	-2.1118
17626442	6.19353e-06	2.30921	0.00163056	1.71441
17801569	6.21433e-06	1.45643	5.45136e-06	1.46085
17795691	6.2746e-06	2.15975	4.86964e-06	2.18586
17880375	6.44277e-06	1.86657	0.0010682	1.52339
17711878	6.49463e-06	2.17545	0.000102955	1.90242
17882735	6.73744e-06	-5.33643	0.00277575	-2.77939
17883133	6.81812e-06	-2.80856	1.11345e-05	-2.7217
17792663	6.85688e-06	1.52714	0.000223789	1.39154
17634476	6.99531e-06	-1.72139	0.00101369	-1.44791
17639434	7.02074e-06	-1.54948
17833029	7.08549e-06	1.69501	5.38435e-06	1.71032
17656679	7.23555e-06	2.22616	1.79101e-08	3.00449
17862568	7.59868e-06	2.10229	9.40666e-05	1.86851
17666704	7.77813e-06	1.96116
17701462	7.91977e-06	1.82178
17692307	7.97186e-06	4.15881	0.000855162	2.70653
17883498	8.15587e-06	-3.74873	3.47138e-05	-3.3228
17700075	8.18557e-06	2.62734	1.38127e-13	8.4387
17827785	8.22696e-06	1.63196	5.09726e-06	1.65612
17719511	8.83007e-06	1.95227	1.21558e-05	1.92611
17757587	8.85113e-06	-1.8607	0.000120452	-1.67785
17699991	8.99868e-06	-1.6024	0.00021727	-1.45525
17653324	9.04202e-06	-2.32038
17876611	9.08893e-06	2.15051	8.32288e-07	2.41317
17683754	9.37063e-06	1.41887	3.77851e-06	1.44764
17665328	9.55551e-06	2.16203	0.00018607	1.86591
17874856	9.56459e-06	1.98214
17613367	9.70703e-06	1.63899
17767113	9.74479e-06	1.4969	1.16072e-05	1.49021
17825888	9.85468e-06	1.73407
17871354	9.90769e-06	1.71193
17743771	9.95438e-06	3.69138	0.000233797	2.82786
17623967	1.00563e-05	2.09053	0.00018235	1.82114
17758413	1.02808e-05	-2.07047
17683774	1.0432e-05	-2.01319
17783585	1.05745e-05	1.86818
17715725	1.06128e-05	1.9345	0.00106018	1.58336
17677604	1.06362e-05	-1.60481
17699751	1.08012e-05	-2.05643
17631448	1.08558e-05	-2.11045	0.00069565	-1.72067
17869946	1.10932e-05	-1.64068	0.00135613	-1.40109
17618749	1.11374e-05	2.03422	8.46009e-07	2.28615
17654394	1.14094e-05	-1.88826	7.59264e-06	-1.91985
17694707	1.14719e-05	2.0983	0.000156224	1.85
17715279	1.14836e-05	1.58858	5.90694e-06	1.62021
17652201	1.15004e-05	-1.66343	4.64396e-05	-1.58884
17883544	1.16899e-05	-3.99647	4.69689e-05	-3.52833
17616697	1.18913e-05	2.59333
17718561	1.1922e-05	1.68217
17846119	1.19894e-05	1.67247	0.00207136	1.40005
17881823	1.20335e-05	2.42763
17665797	1.2381e-05	1.91424	0.000334297	1.66266
17821693	1.23862e-05	2.34419
17755886	1.2477e-05	2.60256	0.00234365	1.85687
17779286	1.25972e-05	1.78734	6.68841e-06	1.83023
17783185	1.27352e-05	3.79874	1.54331e-05	3.73621
17654217	1.31331e-05	1.49271	0.000105976	1.41312
17838948	1.37289e-05	1.79593	0.000380527	1.57832
17693479	1.37628e-05	2.50873	0.002544	1.81013
17659582	1.38006e-05	2.08462
17663219	1.385e-05	-1.75862	0.000851451	-1.50486
17640452	1.39804e-05	-2.06482
17874214	1.40007e-05	1.7851
17874046	1.40147e-05	2.18887	0.00160191	1.70295
17718750	1.40959e-05	1.41375
17770927	1.4343e-05	-2.12044	0.00149715	-1.67399
17621578	1.45661e-05	1.36906	0.00219723	1.22973
17864662	1.46192e-05	-1.97448
17663221	1.46871e-05	1.30621
17726933	1.4872e-05	-2.37242
17747603	1.49258e-05	2.00385	0.000113368	1.82554
17676829	1.4946e-05	1.72198	0.000396949	1.52861
17722383	1.515e-05	2.5054	6.72433e-06	2.6305
17735295	1.52629e-05	2.00867	0.00178388	1.60188
17614474	1.52668e-05	1.64743	0.000315546	1.48919
17743225	1.53007e-05	-2.00644	0.00117213	-1.63493
17628511	1.54726e-05	-1.69984	1.05714e-05	-1.72249
17790666	1.55166e-05	2.2645
17693074	1.58749e-05	-2.22451	0.00015806	-1.96833
17875692	1.60335e-05	2.1077	0.000576954	1.76021
17670120	1.60597e-05	2.91097	0.000873925	2.17951
17632692	1.61145e-05	1.65996
17871080	1.62477e-05	2.36526	0.00309672	1.73126
17698850	1.64154e-05	2.00877	0.00221857	1.58773
17607431	1.65515e-05	-2.32667	0.000909906	-1.84879
17767253	1.68947e-05	1.84561
17715824	1.70655e-05	3.34368	0.000234341	2.704
17653023	1.75177e-05	-1.41585	6.25337e-05	-1.37472
17881717	1.75893e-05	-3.89401	0.00129305	-2.60884
17811254	1.76341e-05	1.69138
17875663	1.80792e-05	1.49219	0.0011855	1.33023
17729695	1.82006e-05	2.79668	0.00129351	2.06895
17686922	1.83323e-05	1.66554
17853637	1.83915e-05	1.73957
17640264	1.85292e-05	1.43436	2.88949e-06	1.49934
17624178	1.85604e-05	2.88755	0.00206133	2.04284
17778278	1.88211e-05	1.21635	1.26067e-05	1.22271
17611549	1.90987e-05	2.00959
17865624	1.95761e-05	-1.48876
17794763	1.95926e-05	1.45423	8.46022e-09	1.76472
17753402	2.05971e-05	-1.44131	9.948e-07	-1.5515
17863461	2.08682e-05	1.84341	0.00245253	1.50271
17734560	2.094e-05	2.2284
17615501	2.14705e-05	1.50928	5.65938e-05	1.46914
17622566	2.21531e-05	-1.44799
17766732	2.23608e-05	-1.62794
17733220	2.23675e-05	-1.65049	1.83281e-05	-1.66163
17658161	2.2413e-05	1.35684	5.81575e-06	1.39484
17803080	2.2519e-05	1.46977	5.48781e-12	2.21419
17723564	2.25681e-05	2.01915
17797030	2.26098e-05	1.29277	0.000201697	1.24398
17768104	2.26271e-05	1.67409	5.22045e-07	1.90644
17773315	2.27008e-05	-2.75912	9.31557e-05	-2.50273
17670114	2.27182e-05	1.76695
17851037	2.28346e-05	1.76838	4.27909e-05	1.72599
17773194	2.31335e-05	1.71807	0.000918419	1.49539
17684321	2.32371e-05	-1.95993	0.000366674	-1.72436
17811248	2.38602e-05	1.3511
17606189	2.38713e-05	-2.56913
17618057	2.39306e-05	-1.85651	4.16119e-06	-1.99691
17673512	2.42666e-05	2.13108
17829623	2.43097e-05	1.63952	0.000482313	1.47975
17800736	2.44672e-05	1.77527
17716360	2.45761e-05	1.44623
17814884	2.47847e-05	-2.07979	0.00286978	-1.62338
17767961	2.47951e-05	-2.19894
17606337	2.48208e-05	-2.04968
17663401	2.48373e-05	-1.61787	0.000193149	-1.51151
17802178	2.50796e-05	1.39515	2.59565e-08	1.6287
17824194	2.53049e-05	2.39331
17803828	2.54629e-05	1.86196	0.000299711	1.67429
17883312	2.56758e-05	-3.31097	4.89144e-05	-3.14077
17787756	2.57518e-05	2.3224
17688412	2.63101e-05	2.03657	1.37663e-05	2.10146
17806886	2.65869e-05	-1.69232	2.92392e-05	-1.68654
17715768	2.66996e-05	1.52029
17752507	2.68323e-05	2.02682
17684931	2.69381e-05	2.70137	0.000480405	2.21109
17647723	2.72362e-05	2.17284	1.27635e-05	2.26181
17623254	2.73722e-05	1.81843	3.21956e-07	2.17744
17649426	2.75834e-05	2.09549
17660414	2.77718e-05	2.38371	0.000935713	1.92081
17809654	2.79557e-05	2.26247	0.000291459	1.97957
17859647	2.79678e-05	2.14921	5.09732e-05	2.08233
17876932	2.84153e-05	-1.39254	0.00160505	-1.266
17688717	2.90489e-05	1.87883
17704535	2.91555e-05	1.44818	2.36463e-07	1.63522
17794646	2.95383e-05	2.37133	1.04073e-05	2.52244
17694354	2.96432e-05	-2.1141
17668822	2.96474e-05	1.84686
17710722	2.97238e-05	-1.46511	3.26882e-05	-1.46145
17697098	2.97834e-05	1.95374	0.00382885	1.54284
17877111	2.98764e-05	1.62366	4.54753e-05	1.60096
17708637	2.99537e-05	1.78446
17641253	3.02129e-05	-2.64263	0.000446729	2.19724
17600523	3.03318e-05	-2.2336	0.000299126	-1.96291
17787031	3.04814e-05	2.30521	0.000389443	1.9843
17882743	3.0637e-05	-1.79405
17730290	3.12158e-05	1.50081	1.06069e-05	1.5468
17859573	3.13412e-05	-1.55673	1.49148e-05	-1.59243
17749134	3.20237e-05	2.51546	0.000874194	2.02321
17770413	3.20344e-05	2.20764	1.76441e-06	2.58461
17807464	3.2039e-05	-1.65639
17832393	3.246e-05	2.48843	0.000419773	2.1092
17797143	3.31972e-05	1.59637	1.36393e-07	1.90507
17628790	3.34091e-05	-2.78233	0.00306804	-1.98525
17874787	3.34542e-05	-1.91523	0.000589505	-1.67686
17683610	3.34959e-05	-1.4607	2.31961e-05	-1.47489
17764283	3.36487e-05	1.39068
17711872	3.37728e-05	-1.80028	0.00137721	-1.53831
17731459	3.40553e-05	-1.40393
17622112	3.41639e-05	2.13653
17871861	3.42908e-05	-1.78307	1.13766e-05	-1.86377
17649015	3.45743e-05	2.13203	2.72554e-05	2.15896
17711739	3.46876e-05	-1.60099	0.00383879	-1.36049
17782189	3.50577e-05	-1.62056	0.00347542	-1.37692
17808996	3.52964e-05	-2.24397
17848539	3.53941e-05	-1.28146
17875665	3.55753e-05	2.19824	0.00231755	1.72892
17868175	3.56048e-05	-1.62491
17691744	3.57455e-05	3.88188
17878839	3.58426e-05	1.91512	0.00353446	1.5377
17700148	3.6213e-05	1.33397
17860366	3.64392e-05	1.65667	0.000110526	1.59242
17676879	3.64582e-05	1.59218	1.09075e-07	1.92003
17640049	3.71477e-05	-2.17596	9.95893e-06	-2.33698
17883508	3.75186e-05	-3.40966	4.39581e-05	-3.36339
17629677	3.85033e-05	1.93004	3.65972e-06	2.14989
17725566	3.85816e-05	-1.83681	4.80408e-06	-2.00655
17613244	3.88574e-05	-1.43168
17865381	3.89247e-05	5.6196
17883716	3.9315e-05	-3.51388	0.000106872	-3.21389
17793992	3.95418e-05	1.66695	0.00012259	1.5998
17638440	3.98697e-05	-1.63365
17622875	4.08766e-05	1.40914	0.00222298	1.27362
17739677	4.08796e-05	1.40621	1.89604e-05	1.4324
17841812	4.10122e-05	2.33684
17726394	4.15204e-05	1.46536
17752004	4.15542e-05	1.56764
17633993	4.25553e-05	-2.00585
17825179	4.29704e-05	1.8469	0.000880293	1.61304
17652417	4.31933e-05	1.97326	0.00101107	1.68661
17779186	4.32792e-05	4.1062
17659048	4.36317e-05	2.02103	2.03447e-05	2.09936
17813635	4.3717e-05	2.11614
17691433	4.41375e-05	2.29648	0.000281012	2.05474
17783612	4.45084e-05	1.41711
17686553	4.45329e-05	2.3435
17840925	4.49888e-05	-1.43751	0.000239342	-1.37585
17819266	4.51805e-05	1.55428
17835650	4.54264e-05	1.97098
17682015	4.59283e-05	1.75796	6.48527e-05	1.73362
17799940	4.68174e-05	4.38277
17626417	4.72058e-05	1.57932
17883262	4.78712e-05	-1.11608	0.00203637	-1.0823
17763597	4.83205e-05	-1.37144
17864290	4.84611e-05	1.89749
17689791	4.90096e-05	-1.81513
17883560	4.98907e-05	-2.77211	0.000465335	-2.34558
17637237	4.99257e-05	1.85188	2.83208e-05	1.89885
17829858	5.01312e-05	2.90553
17868657	5.01404e-05	1.98268	1.16039e-06	2.38056
17697453	5.028e-05	1.66118
17632781	5.04043e-05	1.98946	0.00278052	1.61615
17742869	5.1556e-05	1.42023	0.000409259	1.34638
17641749	5.17707e-05	1.62139
17672928	5.20771e-05	2.73684	0.00116639	2.16749
17853421	5.22069e-05	-1.3552
17684270	5.27673e-05	-2.04012
17667043	5.2869e-05	-2.63323
17602529	5.36105e-05	-1.91992	3.54368e-06	-2.17917
17630947	5.41188e-05	1.71582	1.38968e-08	2.36129
17723519	5.42144e-05	2.81114
17870897	5.44223e-05	1.3297	0.00117997	1.24531
17687817	5.45192e-05	-1.65896	1.77145e-07	-2.04022
17715837	5.51356e-05	1.77397	1.01147e-05	1.90238
17769452	5.70794e-05	-1.43964
17622162	5.77913e-05	-1.54758
17881367	5.80575e-05	2.67033	1.53525e-07	4.05533
17725417	5.81823e-05	-1.56378	9.106e-05	-1.54104
17883308	5.81891e-05	-3.14922	5.09104e-06	-3.85129
17862920	5.87998e-05	1.40673
17734546	5.88558e-05	1.38935
17656471	5.95586e-05	-1.42812
17689533	5.97975e-05	-2.5131	0.000260842	-2.27292
17778494	5.99133e-05	-1.3654	0.00226762	-1.25264
17717113	6.02178e-05	1.54814
17880882	6.03287e-05	1.51948
17882047	6.11332e-05	-1.91427
17728071	6.18465e-05	2.68768	0.000503914	2.30168
17848419	6.30092e-05	2.0027
17612533	6.31047e-05	1.92531
17717361	6.40167e-05	-1.33773	1.48967e-06	-1.44789
17705431	6.40235e-05	1.50678	0.000384334	1.42627
17640727	6.40863e-05	2.2551	6.07597e-05	2.26229
17698134	6.61667e-05	2.0829	0.00392492	1.65097
17820414	6.82522e-05	1.41625
17880222	6.91401e-05	1.41791
17771869	6.945e-05	3.20854
17742533	6.95444e-05	-1.71246
17775649	6.96795e-05	2.15169	8.84927e-06	2.4157
17769173	7.05867e-05	1.87053	0.00288139	1.56216
17674437	7.12049e-05	-1.39904
17671175	7.1386e-05	-1.30621	7.00509e-05	-1.3067
17634974	7.19024e-05	1.70097
17766794	7.23668e-05	1.55767	0.00272963	1.37474
17756175	7.27222e-05	-2.37846	0.000982544	-2.00177
17687759	7.34445e-05	-1.78241	4.0311e-05	-1.82879
17773180	7.44056e-05	2.03565
17747301	7.44751e-05	-2.14205	0.000255627	-1.99568
17636300	7.4539e-05	-2.09599	0.000846388	-1.82685
17875489	7.45686e-05	1.53693	0.00139741	1.39488
17831023	7.50218e-05	-2.10655	0.000793967	-1.84179
17655243	7.66943e-05	1.6763
17830371	7.70978e-05	1.67766
17749187	7.74768e-05	7.92499	0.000428292	6.05531
17779781	7.75478e-05	3.40983
17872530	7.76419e-05	-1.70728
17830353	7.85984e-05	1.79288	0.00261426	1.52797
17659491	7.87133e-05	-1.48733
17788778	7.98608e-05	1.35665	3.21953e-06	1.45825
17811257	7.99143e-05	2.36098	0.00113774	1.97963
17881973	8.01968e-05	-2.20117	0.0010637	-1.88064
17747839	8.06895e-05	2.24641
17735494	8.08586e-05	1.39564
17698102	8.09937e-05	1.53887	3.21054e-05	1.58534
17849247	8.11449e-05	1.68815	0.000295842	1.60344
17814688	8.20628e-05	1.34917
17732712	8.21851e-05	-1.60319	0.00261157	-1.41047
17826516	8.23667e-05	-2.74405
17664476	8.30293e-05	2.44359
17878974	8.31856e-05	-1.43414
17859649	8.35025e-05	2.69202	1.69709e-05	3.02783
17810696	8.35743e-05	1.58776
17877071	8.51786e-05	2.08973	2.36618e-08	3.26558
17706502	8.52613e-05	3.18444
17777527	8.60995e-05	1.49451	4.06257e-06	1.63702
17624723	8.70318e-05	-2.83293
17879483	8.7761e-05	3.06486
17625168	8.95412e-05	-1.71876
17734107	8.98013e-05	2.05097
17883524	9.06249e-05	-3.43161	1.46779e-05	-4.06029
17671173	9.11569e-05	-1.93867	0.000121141	-1.9111
17866179	9.17518e-05	2.52372
17645113	9.19755e-05	1.74951	0.00199298	1.52755
17672512	9.20025e-05	1.43317	0.00236761	1.30661
17810985	9.36548e-05	-2.41272
17634240	9.41185e-05	-1.38956	0.00112408	-1.30356
17636239	9.47538e-05	2.03823	1.51766e-05	2.24838
17788948	9.4871e-05	-1.81978	0.000569984	-1.67427
17843780	9.49246e-05	2.02304	0.000220083	1.93306
17635168	9.51068e-05	-1.67214
17754561	9.55141e-05	2.03637
17796618	9.56193e-05	1.46887
17761838	9.58301e-05	-1.73446	3.54566e-06	-1.98694
17749017	9.58452e-05	2.56361	0.000678925	2.22085
17789082	9.74993e-05	3.84006	3.63779e-06	5.35046
17646017	9.78938e-05	-2.08818	5.00861e-05	-2.16798
17635606	9.8283e-05	2.57706
17883530	0.000100092	-3.28017	0.000359955	-2.91534
17811640	0.000100958	2.114	1.51301e-06	2.67628
17793055	0.000101796	1.74506	0.000409545	1.64296
17690397	0.000103534	1.5511
17632725	0.000104361	1.63638	0.00173372	1.46577
17626338	0.000107179	1.58528
17883528	0.000107462	-3.13898	2.64344e-05	-3.54757
17749032	0.000107537	-1.45214	0.00179332	-1.33543
17693043	0.000107749	1.18792	0.000246301	1.17485
17883264	0.000108437	-1.1111	0.00389061	-1.07766
17832280	0.000109639	-1.46285
17659041	0.000110659	1.61867
17816193	0.000110745	1.60301	0.000587086	1.50672
17830544	0.000111019	1.29075
17683592	0.000111522	2.42023
17825808	0.000111922	-2.50317	0.000301291	-2.33159
17881619	0.000112428	-1.39456
17881747	0.000112428	-1.39456
17819850	0.000112942	-1.536
17882067	0.000113295	2.32394	0.00175133	1.93128
17634541	0.000113559	-1.99665	4.33596e-05	-2.10151
17604589	0.000113939	-1.69156
17606531	0.000113981	-1.99949
17696434	0.000114301	1.32891
17781623	0.000115416	-1.30866
17719533	0.000115643	1.77385	0.000175197	1.74124
17631319	0.000116032	-1.37979
17756133	0.000116336	2.05403
17684843	0.000116546	2.05205
17692413	0.000117291	-1.93059	5.09411e-06	-2.25936
17671634	0.000117757	1.4362	0.000506456	1.37752
17722692	0.000118501	-1.29958	0.000370987	-1.26934
17718737	0.000118545	1.78186	0.00250584	1.54484
17621203	0.000119278	-1.44744
17883502	0.000119526	-2.38345	0.000584481	-2.13681
17835411	0.0001208	2.17522
17865372	0.000123701	-1.93495
17883310	0.000124508	-3.10919	5.87709e-05	-3.32181
17718571	0.000125002	2.00029
17866734	0.000125086	2.63973
17883536	0.000125671	-3.2826	1.02027e-05	-4.1294
17760337	0.000127156	1.28749
17872155	0.000127708	-2.57017
17669429	0.00012778	-1.80326
17804983	0.0001279	1.37777	0.00201008	1.28243
17745587	0.000127981	1.75801
17720672	0.00012923	-2.06401	9.47792e-06	-2.38815
17882873	0.00012923	-2.06401	9.47792e-06	-2.38815
17702067	0.000129569	-1.35057	8.74745e-07	-1.51499
17730206	0.000129929	2.04342	0.000103923	2.06913
17605235	0.000130989	-1.77772
17781959	0.000132491	-2.02623	0.00305215	-1.68921
17883618	0.00013257	-3.02635	1.78051e-05	-3.59516
17831159	0.000133934	-1.60975	7.93228e-06	-1.78602
17883552	0.000133959	-2.94554	1.67641e-05	-3.50547
17783719	0.000134785	-1.39865
17791527	0.000134785	-1.39865
17682315	0.000136309	-2.06628	0.000770829	-1.86741
17841251	0.000136459	-1.36552
17676709	0.00013665	1.3598	0.00166525	1.27729
17638111	0.000139619	-1.43419
17693126	0.000139834	-1.48392	0.000676671	-1.41139
17869496	0.000140171	1.42771	0.00156092	1.33119
17776804	0.000141501	1.56891
17664254	0.000142377	-1.62167
17811692	0.00014418	2.32472
17740414	0.000145312	2.18778
17771839	0.000145475	1.41077	6.78952e-06	1.53127
17820496	0.00014583	1.43735	0.00028912	1.40909
17880263	0.000148017	-1.52287	0.00116555	-1.41876
17880269	0.000148017	-1.52287	0.00116555	-1.41876
17626554	0.00015001	-1.38737
17620391	0.000150785	1.64775	0.00205458	1.47963
17641563	0.000151047	-1.49532
17702230	0.000151158	-1.64772	0.000714878	-1.54716
17880579	0.000151317	-2.23726
17789837	0.000151325	2.27686
17800746	0.000151358	-1.2376
17858443	0.000153317	1.5668	6.51416e-05	1.61521
17829222	0.000156177	-1.273
17717422	0.000157087	-1.40752
17841585	0.000157745	1.55691	0.000119323	1.57234
17636794	0.000157883	-1.50608
17873356	0.00015849	-1.75929
17712756	0.000158657	1.98317	0.000180932	1.96892
17625046	0.000158759	-2.0235	2.31704e-05	-2.25185
17642375	0.00015999	1.63247
17745928	0.000160013	-2.25009
17769315	0.000160067	1.56639
17639779	0.000161381	-1.59319	1.72942e-05	-1.72927
17617497	0.000161688	2.14543
17735853	0.000162148	-1.63437	0.00263702	-1.45781
17736736	0.000162283	-2.22852
17607437	0.000162528	-2.44083
17655319	0.000163445	1.51423	0.00103599	1.42182
17880814	0.000163612	1.59463
17669851	0.000163613	-1.6896	0.00175448	-1.52399
17746126	0.000164573	-2.09329	0.00141698	-1.83545
17868735	0.000165885	-1.4319
17636799	0.000167424	-1.99622	0.000747022	-1.83402
17714902	0.000170388	1.52969
17603809	0.000170693	-2.00237
17678890	0.000172265	1.73806
17645314	0.000172404	2.1357
17648697	0.000172698	1.49666
17638220	0.000174531	1.86684
17883526	0.000174664	-3.52468	0.00155246	-2.80301
17664031	0.000174861	-1.58905
17740855	0.000175888	1.71685	0.000118926	1.74636
17725044	0.000179387	1.78483
17664635	0.000179987	1.34467
17835285	0.000181763	-1.37254
17613223	0.000181957	-1.59845
17774623	0.000183466	-1.92169
17715935	0.000183629	1.6925	2.98021e-06	2.00899
17883258	0.000183876	-1.10656	0.00210915	-1.08381
17791155	0.000184579	2.49389
17756337	0.000186538	2.03756	7.28009e-06	2.44776
17818517	0.000188139	-1.23738
17882393	0.000188505	1.38394
17697484	0.000189141	1.27064
17732459	0.000189879	1.51033	2.20517e-06	1.74692
17608067	0.000191005	-2.00572
17746727	0.000191123	1.88099	3.69276e-09	3.23986
17630006	0.00019226	1.42237
17792262	0.000193118	1.52923	7.11174e-07	1.84612
17756335	0.00019389	2.12484
17626800	0.00019399	1.80246
17658983	0.000194	2.21377
17774974	0.000196179	-1.37172
17832808	0.000197078	1.80033
17882303	0.000198792	1.59549	0.000699409	1.51934
17635176	0.000200186	2.08117	7.7937e-05	2.20139
17727681	0.00020065	3.28275
17799552	0.000201171	-1.57811	0.00340425	-1.41306
17835900	0.000201809	1.64365
17619502	0.000207432	2.9405	4.51971e-07	4.97515
17668268	0.000209761	1.97684
17837782	0.00021014	1.50887
17674659	0.000210907	1.689	8.21831e-06	1.93644
17790319	0.000211233	1.48929	0.00312845	1.35814
17883506	0.000214321	-2.72343	1.58822e-05	-3.36194
17864351	0.000215069	-1.44366	7.11547e-05	-1.49236
17612139	0.00021549	3.56358
17802124	0.00021551	1.36604
17796762	0.000215523	1.44975
17809806	0.000216316	-1.47499	1.1071e-05	-1.61909
17644342	0.000217428	1.49113
17797379	0.000219888	-1.587
17612693	0.000223906	1.78276	0.00158041	1.61903
17738018	0.000225104	-1.75081
17766899	0.000225342	-1.89963	0.00294752	-1.64753
17666271	0.000226023	2.32022
17711454	0.000226852	-2.40346	0.0028939	-1.98211
17808966	0.000227427	-1.52957
17624770	0.000227624	-2.06117
17817059	0.000227693	-1.61154
17631323	0.000228424	-1.37368
17748626	0.000228619	1.48189	0.000437652	1.45051
17854295	0.000229319	1.69979
17867312	0.000229863	-1.42305	3.61706e-05	-1.50101
17862001	0.000231532	2.28711
17777828	0.000232373	1.56498
17641707	0.000234787	-1.39168
17817003	0.00023501	-1.41706
17607779	0.000236171	-1.68324
17644136	0.000236201	-1.49145
17805604	0.000236947	2.51272	4.53478e-06	3.37585
17742867	0.000237274	1.32425	0.00243666	1.25147
17774944	0.000241376	-1.55285	0.00323493	-1.40587
17602203	0.000241872	-2.25482	0.000700188	-2.09549
17843637	0.000241882	1.79381
17689967	0.000243028	-1.32589
17755689	0.000243406	-1.34386
17883504	0.0002445	-2.60448	0.00281181	-2.12554
17674863	0.000245882	-1.60021
17759688	0.00024613	1.99297
17842119	0.000246588	1.51338
17671811	0.000247036	-1.44053
17818453	0.000249347	-1.85136
17817782	0.000249409	1.31508	0.00227186	1.24784
17696619	0.000249507	-1.40362
17780825	0.000250711	-1.78806
17766882	0.000251917	1.55503
17859645	0.000252034	1.87713
17808471	0.000253706	1.84181
17625725	0.000253954	2.29495
17823538	0.000255022	2.24576
17846440	0.00025531	1.81066
17881465	0.000257043	-1.40893	0.000923998	-1.35697
17845139	0.000257526	-1.3977	0.000527831	-1.36946
17672719	0.000257933	1.5873	0.00167989	1.47272
17619452	0.000259344	1.87558
17787819	0.000259882	1.56827
17827692	0.000260739	1.59181	1.08956e-05	1.79683
17859672	0.000264552	-1.63949	1.84493e-07	-2.19508
17801259	0.000265288	1.52661
17853365	0.000266348	-1.48346
17773119	0.00026688	2.23928	0.000655576	2.10474
17688961	0.000269276	1.80333	0.000293975	1.79545
17834858	0.000269631	1.4242
17767504	0.000272123	1.85543
17835999	0.000272302	2.15073	5.33326e-05	2.38651
17726592	0.000273846	-1.74395	9.37102e-07	-2.25697
17629208	0.000274186	-1.34779
17732960	0.000274648	-1.42578
17854761	0.000276631	1.46537
17875090	0.000277405	-1.36635	0.00153535	-1.3043
17836072	0.000277547	1.47551	8.92159e-05	1.53115
17812605	0.000277952	-1.46859
17715224	0.000279069	2.17439	0.000109351	2.31156
17849096	0.000279866	1.61782
17727973	0.000280154	1.26544
17696070	0.0002811	-2.28938
17826267	0.000281381	-2.84149
17673475	0.000282083	-1.35602
17683555	0.000282564	2.10685
17612088	0.000282728	2.00257
17781581	0.000282975	1.31907
17709760	0.000285263	-2.7466	0.000655667	-2.55481
17797445	0.000285795	-1.17334	0.00213042	-1.14072
17786877	0.00028587	1.5857	0.000613487	1.5384
17795957	0.000286707	1.82457
17608229	0.000287037	-1.50979
17877800	0.000287859	1.30336	0.00118793	1.26148
17783721	0.000290759	1.38966
17800295	0.000291334	-1.67576	0.000953715	-1.58907
17883558	0.000292271	-2.06178	0.00363321	-1.75306
17670759	0.000292589	-1.3061
17631493	0.000293703	1.79729	0.000149011	1.85892
17687349	0.00029412	-2.15682	0.00139836	-1.94236
17881148	0.000295145	1.59453	0.000241785	1.60723
17789560	0.000296068	1.23407	8.15399e-07	1.3665
17730808	0.000296291	-1.65184
17644941	0.000301761	1.96954
17715826	0.000302024	1.96775	0.00218961	1.74793
17783481	0.00030287	2.27091	0.000571658	2.17093
17826729	0.000304932	-1.65402	0.00010524	-1.73079
17660563	0.000305103	-1.38253
17878405	0.000310771	1.94533	0.00195926	1.74561
17616399	0.000311134	-1.76924	0.000527011	-1.72379
17669787	0.000311461	-1.63146
17664786	0.000312203	-2.03481
17798353	0.000312561	-1.49589
17691169	0.000312846	-1.3358
17611290	0.000313727	1.47048	0.00333107	1.35543
17607455	0.000314026	-2.04201
17808508	0.000316224	-1.80161
17812760	0.000317229	-1.59262	0.000781884	-1.53535
17730864	0.000317496	1.35873
17765735	0.000320091	1.85061
17648692	0.000321317	2.37834	0.000997321	2.18227
17719501	0.00032351	1.79355
17839408	0.00032454	1.75239	0.00345832	1.55546
17702044	0.000324652	1.36947	0.00233849	1.29577
17782247	0.000327291	1.30182
17602423	0.000327328	-2.18258	1.06362e-07	-3.66733
17773353	0.000327351	1.45808	0.000578062	1.43109
17882691	0.000328208	-1.39767
17791522	0.000331877	1.33758
17619844	0.00033287	1.97099
17823741	0.00033289	-1.61441	0.00138063	-1.51997
17875851	0.000335352	-1.50314	0.00143784	-1.42617
17817104	0.000335736	1.33415
17733202	0.000337972	1.6853
17700983	0.000339398	2.01602
17661790	0.000339646	-1.53972
17681698	0.000339668	-1.35585
17754970	0.000341067	1.71816
17723019	0.000343239	-1.49459
17637628	0.000345327	1.59359	0.000446555	1.57702
17743767	0.000345518	1.47084
17881879	0.000353422	-1.35175
17854979	0.000354358	1.40498
17748644	0.000355119	-1.83266
17797352	0.000358521	-1.46382	0.000974866	-1.4152
17873489	0.000359238	1.65041	0.000100801	1.7434
17834578	0.000362805	-1.38483
17824022	0.000365711	2.2571
17883260	0.000367889	-1.10015
17765545	0.000370815	1.23407
17710972	0.000371428	-1.38531
17807531	0.000372334	1.47649	0.0014254	1.40893
17746028	0.000372509	1.83107	0.00196113	1.67264
17635340	0.000372717	1.39435
17763934	0.000378987	1.7704	0.000439326	1.75729
17633475	0.000379176	-1.49018	0.00279927	-1.38602
17834711	0.000379775	-1.54324
17882395	0.000381002	1.38922
17742246	0.000382011	1.89006
17879324	0.00038981	2.46815
17722724	0.000390423	-1.66052	0.000133421	-1.74113
17651885	0.000391492	-1.46125
17652947	0.000394655	2.64236	4.98608e-06	3.79174
17645655	0.00039795	1.48694	2.89372e-07	1.89386
17636301	0.000402115	-1.77257	6.42915e-06	-2.16918
17636302	0.000402115	-1.77257	6.42915e-06	-2.16918
17699963	0.000402214	1.37975
17755007	0.000404026	-1.84063
17799819	0.000404076	1.89265	0.000563846	1.8572
17673325	0.00040885	-1.51262	0.00335287	-1.39624
17636617	0.000409183	-1.37361
17803101	0.000410083	-1.45567
17761729	0.000412884	-1.31419	2.31293e-05	-1.40647
17729116	0.000414921	1.45754
17708921	0.000416	-1.35954
17770307	0.000416615	-1.87128
17806441	0.000416887	1.61399	0.00032466	1.63119
17857715	0.000416931	-1.31261
17662355	0.000418989	1.6269
17794706	0.000419679	1.88869
17804387	0.00041988	1.63034
17724607	0.00042176	1.46817
17861900	0.000423557	-1.72279	0.00387295	-1.54112
17783712	0.000423616	-1.37116
17716254	0.000425191	-1.22039	0.000236768	-1.23303
17600341	0.000425254	-1.61518
17684462	0.000425359	2.37989	0.000171037	2.55132
17883500	0.0004257	-2.00839	0.000271158	-2.06511
17879122	0.000430579	1.87355
17833152	0.000433351	1.52042
17867239	0.000434427	-1.26618	0.00154735	-1.23206
17832749	0.000434446	1.59828
17770806	0.00043806	-1.45022
17614890	0.000439181	1.92754	1.16341e-05	2.36773
17734809	0.000441063	1.55827
17774847	0.000443089	1.68363
17771703	0.000444163	1.33029	3.30596e-06	1.50001
17667579	0.000448013	1.60931	0.000134124	1.69294
17826956	0.000449877	1.77515
17609791	0.00045563	-1.78883
17698340	0.000456256	-1.22418
17859651	0.000460353	2.71656	1.23444e-05	3.71778
17651251	0.000460916	1.41411	0.00013659	1.46788
17738845	0.000464537	-2.28621	0.001845	-2.05833
17784863	0.00046481	1.40685
17865538	0.000465101	-1.24036
17879447	0.000465585	1.57943
17641742	0.000469413	-1.34479
17603231	0.000470473	-2.84006
17697458	0.00047179	1.84167
17774581	0.000471926	1.91221	6.51213e-05	2.14123
17672246	0.000473442	-1.58761	0.00195526	-1.49434
17602901	0.00047394	-2.16556
17812253	0.00047455	1.98735
17845843	0.000480612	1.57068
17879645	0.000482068	-1.31166	0.00331942	-1.24898
17700392	0.000482338	-1.6069	2.46798e-06	-1.99493
17839000	0.000486187	-1.56382
17636281	0.000490451	-1.6103
17652338	0.000491747	1.24721
17660276	0.000492234	-1.90008
17721140	0.000492687	1.84517
17867334	0.000493048	1.72946
17600857	0.000494107	-1.60404	0.000117001	-1.70427
17637261	0.000497226	-1.42707
17718034	0.000497232	2.15798
17747629	0.000497267	-1.62006	5.37615e-05	-1.78134
17882057	0.000500245	1.35919	0.00232707	1.30071
17624831	0.000500846	-1.55791
17759158	0.000502455	1.42637
17837513	0.00050247	-1.47133	7.57668e-05	-1.56995
17626518	0.000509208	-2.12025
17827026	0.000512458	1.5771	0.000662181	1.56035
17718537	0.000513278	-1.7372	0.001706	-1.63335
17681890	0.00052138	1.24455
17882141	0.000523329	-1.83225	3.32605e-05	-2.12393
17614403	0.000524113	-1.42341
17623743	0.000525582	1.64038	4.1815e-06	2.02185
17710636	0.00052608	1.33545	4.39274e-07	1.59542
17627913	0.000526614	1.82595
17614445	0.000528903	-2.1165	1.79165e-06	-3.06903
17659927	0.000530296	-1.4928
17636019	0.000531573	-1.30272
17655949	0.00053206	1.25739	1.49541e-05	1.35141
17607809	0.000535038	-2.33756
17607861	0.000535038	-2.33756
17882183	0.000536738	1.27382
17803172	0.000538634	-1.64513
17627864	0.000540017	1.76649	2.27832e-05	2.07193
17792333	0.000540515	1.97204	0.0011614	1.87925
17721464	0.000542234	-1.41152	2.03198e-06	-1.67023
17830366	0.000544767	1.43403
17693071	0.000545163	-1.49507
17672093	0.000546156	-2.99947
17758833	0.000546896	-1.47219
17719499	0.000548152	1.8339
17673222	0.000550645	1.62591	4.84018e-05	1.80683
17726902	0.00055112	-2.1056
17718894	0.000551764	-1.56188
17767984	0.000552079	-1.61583	0.0019949	-1.52492
17808328	0.000552617	-1.25192	8.28908e-05	-1.30075
17765647	0.00055394	1.57429
17606239	0.000555489	-1.81463
17822329	0.000555708	1.73206
17606633	0.000561275	-2.09512
17601801	0.000564114	-1.4959
17802971	0.000565494	1.3135
17775340	0.000567755	1.32185	1.52504e-05	1.44572
17842254	0.000569013	-1.37077	0.00158051	-1.32995
17880627	0.000573139	-1.32112
17771235	0.000574344	-1.39096	4.25317e-05	-1.50219
17624214	0.000574505	-1.42393
17696464	0.000575647	-1.47775	0.00263754	-1.39669
17720378	0.000575739	-1.71139
17724936	0.000576676	1.41918
17694192	0.000578074	1.26584	2.04865e-08	1.56345
17674915	0.000578925	-1.42254
17661362	0.000579678	1.56901
17686924	0.000579982	-1.45989
17777243	0.00058321	1.93434
17728422	0.000583898	-1.28846
17842925	0.000584041	1.77068	0.000321499	1.82696
17875182	0.000585381	-1.76043
17772365	0.000585632	1.52962
17811251	0.000585827	1.63716
17734486	0.000588248	-1.45951	0.000434243	-1.47503
17791546	0.000590195	-1.31082	0.00294832	-1.25749
17636386	0.000590217	-1.65551
17851514	0.00060042	-1.66116
17692632	0.000601058	-1.56421	3.50822e-05	-1.75342
17611983	0.00060375	2.63926
17621115	0.000603942	1.52566	0.000546604	1.53163
17877895	0.000606188	-1.32078
17605341	0.000606964	-1.95762	0.000140697	-2.14096
17766336	0.000608195	1.63805	0.000614651	1.63726
17741088	0.000610762	-1.40675
17776763	0.000611127	1.29788
17643106	0.000611255	-1.45615	3.88937e-06	-1.72358
17816099	0.000611554	-1.31463
17697355	0.000615471	-1.78741
17642469	0.000615507	-1.64933	2.60809e-05	-1.90121
17880961	0.000616163	1.42469
17839270	0.000617528	2.05692
17862452	0.000620599	1.36434	0.000687438	1.3603
17881074	0.000621809	2.16524	0.000100321	2.46174
17756649	0.00062472	-1.4944	0.00256856	-1.41533
17883256	0.000625171	-1.10728
17742972	0.000628135	1.33805
17883532	0.000629526	-2.73387	0.000283829	-2.94373
17674897	0.00063146	-2.06872	8.26223e-06	-2.74194
17773220	0.0006407	1.34478
17663090	0.000642355	1.59027
17875857	0.00064691	-1.39106
17883189	0.000649291	-1.38124	8.07836e-05	-1.46877
17687757	0.000653226	-1.75878	0.00111592	-1.70916
17863204	0.000654346	1.66322
17656054	0.000657268	1.86677
17822800	0.000657376	1.31864	1.11041e-08	1.72605
17702055	0.000657418	3.67477	4.07983e-05	5.10395
17824342	0.000658646	-1.13805	0.00176747	-1.12425
17821040	0.000663735	-1.81188
17746405	0.000665292	-1.72355	0.00217182	-1.62015
17827731	0.000666666	1.49244	0.000868476	1.47758
17719799	0.00066792	1.3517	0.00347912	1.28799
17747770	0.00066876	-1.37216
17664780	0.00066895	-2.53588	6.05619e-06	-3.75645
17822365	0.000668997	-1.7354
17699924	0.000674161	-1.46168	0.000151202	-1.54025
17740977	0.000680347	-2.20018
17780857	0.000682265	1.98184
17691852	0.000684683	2.21173
17881531	0.000685133	1.90153	0.00264664	1.74825
17845631	0.000686584	2.00079
17833909	0.000688195	1.4258
17620701	0.000688466	-2.72797
17760351	0.000690801	1.94171
17683159	0.000691179	-1.37297
17767841	0.0006931	-1.66072
17832121	0.000697862	1.83246	2.0745e-08	3.21518
17602545	0.000698213	-1.64635
17604259	0.000698339	-1.52045
17792759	0.000698516	-1.4698
17771025	0.000698748	-1.43079	0.00152047	-1.39307
17814018	0.000702765	-1.33806
17749397	0.000703515	1.78726	0.00261676	1.65975
17717992	0.000703629	1.85547
17810161	0.000703869	-1.46532	5.7731e-05	-1.59961
17881849	0.000704251	-1.52625	0.000118657	-1.63629
17681491	0.000708208	1.75478
17844098	0.000709058	-1.58185	0.000256091	-1.65237
17603485	0.00071005	-2.56484
17636482	0.000710255	1.7111	0.00201703	1.62088
17685756	0.000711778	-1.27722	3.15371e-05	-1.36939
17875774	0.00071502	-2.1137
17690315	0.000715082	1.55152
17694145	0.000716976	5.73642
17644950	0.00071763	1.68426
17883266	0.000719012	-1.09708
17728560	0.000719929	-1.21952
17647748	0.000720133	-1.69426	0.00359971	-1.55911
17726859	0.000722156	-1.37678
17733382	0.000725321	1.21684	4.40226e-05	1.27987
17870901	0.000725721	3.56373
17786463	0.000725813	1.48135	0.00302653	1.40234
17749257	0.0007307	3.82228
17648071	0.000733163	1.39981
17648607	0.000735366	1.24847	8.83609e-09	1.56391
17742870	0.000736843	1.31072	3.0501e-05	1.41848
17693420	0.000739473	-1.78662
17630554	0.000740427	1.34213	2.82959e-10	1.98866
17701680	0.000741494	1.39406
17791781	0.00074356	2.51464	0.000945639	2.46182
17629374	0.000750176	-1.2214
17652327	0.000750464	2.67293
17804503	0.000751393	-1.68196
17713887	0.000752346	1.74571
17748870	0.000755057	1.67769
17723849	0.000759521	-1.36485	2.87198e-06	-1.5972
17722765	0.000760606	-1.9097	0.000159411	-2.09914
17723515	0.000762122	1.76332
17656469	0.000767899	-1.67448
17829401	0.000769025	1.78653	1.46452e-05	2.20517
17728618	0.000770971	1.25743	7.00146e-08	1.52325
17698074	0.00077331	-1.21715
17731327	0.000778363	1.57262	0.000182369	1.67275
17862003	0.000779265	-1.30319
17605061	0.000779591	-1.99398
17600519	0.000779884	4.62652
17880947	0.000782036	1.39949
17823188	0.000782618	-1.62822
17844404	0.000786358	-1.67589	0.000939248	-1.66114
17670381	0.000787187	1.5325
17737688	0.000788316	-1.32403
17661796	0.000789317	-1.42842
17665187	0.000793001	1.62239	0.000197599	1.72853
17602315	0.000794414	-1.55712
17618138	0.000798648	-1.71437
17835265	0.000800176	1.48034	0.00103938	1.46572
17719495	0.000800871	2.24845	3.70466e-06	3.34568
17669739	0.000802008	-1.51207
17622353	0.000802289	1.46903
17778476	0.000803629	-1.28452
17667257	0.00080567	1.29185	0.00311635	1.24833
17858805	0.00080709	-2.2619	0.000432338	-2.3746
17694319	0.000809209	-1.55197
17796995	0.000811802	-1.4582
17701826	0.000814124	1.9371
17649300	0.000816311	1.49765
17793757	0.000816663	-1.93575
17741423	0.000818306	-1.31119
17636007	0.000822311	1.23693
17711506	0.000822378	-2.39085	0.00100752	-2.35017
17763121	0.000823533	1.36867
17604535	0.000824445	-2.28367
17713540	0.000830927	1.96147
17763373	0.000830948	-1.477	0.000347226	-1.52577
17793398	0.000831463	-1.89057	5.14018e-06	-2.54497
17867122	0.000834364	-1.36867
17703668	0.000837765	-1.39195
17772632	0.00084152	-1.79434	8.61751e-06	-2.29674
17693030	0.000846477	1.73358	0.00355011	1.60236
17791789	0.000848487	-1.25183
17608675	0.0008568	2.17568	0.00287524	1.98127
17696408	0.000861439	1.69353
17666999	0.000862779	1.54352
17603415	0.000865307	-1.85849
17758156	0.000865971	-1.14151
17789192	0.000867372	1.34003
17631808	0.000869552	-1.45654	6.64643e-06	-1.72516
17741844	0.000875122	3.77839
17703633	0.00087641	-1.56025
17749838	0.000877932	-1.66814
17692305	0.000878865	1.76056
17626698	0.000883194	-1.34841
17844984	0.000883643	1.69983
17628529	0.000883739	-1.85621
17883268	0.00088507	-1.10029
17749699	0.000885521	1.61958
17636230	0.000894107	-1.22811
17705657	0.00089615	-1.72498
17688212	0.000899289	1.47085
17786480	0.000899463	1.26463
17775603	0.000900323	1.308
17720028	0.000900453	-1.89353	2.92218e-05	-2.32444
17740034	0.000905089	-1.69734
17743449	0.000908078	-1.53451
17866987	0.000919144	1.34339	2.56662e-05	1.4833
17676975	0.000919286	-1.37506
17880408	0.000919789	-1.3168
17646205	0.000924196	-1.80981
17882301	0.000924914	1.54772	0.000720786	1.56428
17818473	0.000926802	-1.31834
17810220	0.000927837	1.70561
17851448	0.000929793	-1.42481
17603925	0.000932623	-1.97553
17618326	0.000933021	-1.73754	0.000650993	-1.7716
17806624	0.000933982	1.55368	0.00179957	1.50965
17858025	0.000935048	-1.88778	1.66036e-05	-2.39954
17617484	0.000936827	-2.79303	0.000233535	-3.20408
17693886	0.000937067	1.40786
17822975	0.000939034	1.50389
17802242	0.000939731	1.47947	2.99377e-06	1.82301
17850346	0.00094321	-1.23491
17633891	0.000944007	-1.83471	0.00064815	-1.8761
17697454	0.000946392	1.64895
17618572	0.00094829	-1.62347	0.00106797	-1.61427
17735432	0.000955656	-1.41074
17861286	0.000955767	-1.32899
17686353	0.000956417	1.74065	0.00382958	1.61007
17679008	0.000967314	-1.25693	0.000909322	-1.25868
17883658	0.000968238	-1.20739
17882337	0.000971071	-1.43134
17822112	0.000971161	-1.20456
17629107	0.000972208	-1.32522
17748330	0.000973003	-1.33633
17800968	0.000976075	2.31839	0.000865392	2.34165
17881279	0.000978189	-1.22539
17766763	0.00098001	1.43139
17771126	0.000981931	1.70258	0.00173759	1.65165
17873398	0.000984285	1.63387
17639889	0.000984691	-1.48224
17711572	0.000986354	1.84661
17861499	0.000986543	1.34953
17801878	0.000993596	1.66149	1.52435e-05	2.02902
17620710	0.000994535	-1.35062
17681325	0.000996143	2.26347
17778750	0.00099664	3.64161
17724649	0.00100155	-1.33122
17815027	0.001006	2.36283	0.00231701	2.19787
17767938	0.00100926	1.18555	0.000166225	1.22124
17781657	0.00101025	1.92403	2.07975e-07	3.21921
17808842	0.00101118	1.68238	0.00154417	1.64569
17702677	0.00101929	1.57523	7.01915e-05	1.76979
17822726	0.00101962	-1.58193
17880305	0.0010202	-1.28096	9.03075e-05	-1.357
17859575	0.00102459	-1.95884
17844719	0.00102497	-1.5929	0.000647146	-1.62692
17863393	0.00103101	1.52732
17717140	0.00103287	-1.62367	0.000411921	1.69621
17763426	0.00103339	1.62211
17614978	0.00103945	1.31507
17792222	0.00103964	2.00843	0.00118977	1.98964
17624418	0.00104527	1.46253
17770512	0.00104731	-1.30856
17658462	0.00105214	-1.78022	0.000821252	-1.80569
17868140	0.00105225	-2.33474	0.000128718	-2.77409
17679124	0.00105783	-1.3577
17744037	0.00105784	1.39464	0.00302337	1.34579
17735439	0.00106015	-1.38014
17876268	0.00106069	-1.60237
17648299	0.00106089	-1.3609
17793944	0.00106448	1.34095
17711509	0.00106471	1.78106
17832974	0.00106547	1.75111
17696462	0.00107041	-1.25982
17671695	0.00107316	1.37542
17787961	0.00107631	-2.13185
17780691	0.00107677	-1.73994	0.0016593	-1.69835
17741221	0.001077	1.66465
17842651	0.00107962	-1.37895
17827020	0.00108279	1.58704	0.00199542	1.54222
17818965	0.00108337	2.45165	7.90857e-05	3.0754
17864790	0.00108725	-1.76824
17603101	0.00108766	-2.01677	0.00252188	-1.89898
17710457	0.00108831	-1.82319	0.000972839	-1.83553
17778505	0.00108994	1.60166	0.00161364	1.57202
17736920	0.00109061	-1.71061
17736144	0.00109915	2.2963
17724527	0.0010993	1.51577
17693818	0.00110104	1.46611
17666043	0.00110215	1.64653
17615462	0.00110433	-1.91359
17751656	0.00110459	-1.6433
17727348	0.00110575	-1.65803
17612277	0.00111179	-1.38344
17618855	0.00111509	-1.49062	4.51367e-05	-1.6863
17777757	0.00112417	-1.51528
17859846	0.00112459	1.51095
17632266	0.00112571	1.60206	0.00198051	1.55918
17721528	0.00112666	-1.25852
17613282	0.00112693	-1.42044
17812808	0.00113149	-1.64196
17751317	0.00113323	1.2704
17656828	0.00113434	-2.06192	0.00126347	-2.04573
17611062	0.0011394	-1.43064
17870490	0.00114594	1.25236	2.48595e-07	1.49692
17848969	0.00114635	-1.61537	0.000201514	-1.75334
17816808	0.00114768	1.54278
17606159	0.00115026	-1.78419
17805996	0.00115037	-1.26253
17698354	0.00115126	-1.42035
17647366	0.00115474	-1.37128
17742689	0.00115543	-1.60357
17872751	0.00115651	-1.37711
17778500	0.00116058	-1.36746
17844292	0.00116354	1.37809	0.000611867	1.40682
17779556	0.00116882	-1.51808	2.85566e-05	-1.76282
17777215	0.00116949	1.33129
17814795	0.00117219	-1.84962	8.49699e-06	-2.47106
17699548	0.00117258	1.47179
17774023	0.00117387	1.92013
17857804	0.00118058	-1.42319	4.94389e-05	-1.58659
17863163	0.00118058	-1.42319	4.94389e-05	-1.58659
17621403	0.00118478	-1.64908	5.70782e-05	-1.91123
17878135	0.00118552	1.40728	0.00123967	1.4051
17728155	0.00118642	-1.8837
17657789	0.0011892	2.25068	0.000579242	2.3863
17716784	0.00119142	2.05476
17852394	0.00119176	-1.27061
17675117	0.00120069	-1.3408
17625058	0.00120163	1.7732
17740178	0.00120558	-1.19517
17686841	0.00121122	1.88455
17729218	0.00122034	-1.37448
17797231	0.00122215	-1.47536	0.00253587	-1.43266
17704786	0.00122216	1.59935	2.71281e-06	2.1031
17730306	0.00122266	-1.75603
17608493	0.00122376	-1.52245
17641539	0.00122672	-1.37214	9.10538e-05	-1.48751
17606321	0.00122863	-2.0384
17830993	0.00123064	-1.45066
17657808	0.00123405	1.66714
17706382	0.00123751	-1.57225	0.00188058	-1.54189
17649537	0.00123945	2.0307
17874051	0.00124383	1.94761	0.00218683	1.87334
17677389	0.00124514	-2.19135	0.00168442	-2.13858
17622805	0.00124868	-1.36814
17810207	0.00125045	1.35661	0.000126092	1.45364
17679281	0.00125273	-1.45388
17721466	0.00125628	-1.49131	4.05857e-06	-1.85803
17640323	0.00125868	-1.4618	0.00141437	-1.45517
17702990	0.0012614	1.57259	0.000499642	1.64043
17718628	0.00126191	1.62459
17682147	0.00126872	1.37185
17655304	0.00127355	-2.43837
17764652	0.00127876	-1.44717
17719549	0.00128278	2.05311
17608767	0.00128456	-1.803	0.00318883	-1.70465
17629372	0.00128689	2.35201
17659753	0.00129095	-1.28905	0.00179643	-1.27791
17743773	0.00129491	2.17449
17801094	0.00129536	-1.34781
17879174	0.00129548	-1.29213
17612905	0.00129866	2.43019
17691816	0.00129959	-1.5222
17823604	0.00129989	-1.42239	0.00202914	-1.39942
17809656	0.00130635	1.62546
17830341	0.00131216	1.27313
17653649	0.00132034	-1.2965
17644659	0.00133339	-1.26977
17764714	0.00133489	1.37276	5.8623e-07	1.73576
17844521	0.0013414	-1.40267
17786063	0.00134784	-1.8742	2.96466e-06	-2.71635
17881921	0.0013486	-1.37102
17837105	0.00135001	1.57759
17677968	0.00135124	1.31648
17604659	0.00135397	-1.71642	0.000121809	-1.95395
17733116	0.0013581	1.16934	1.79515e-10	1.48495
17851549	0.00135904	1.4025
17801650	0.00136051	1.35872
17755996	0.0013609	1.71962
17783097	0.00136143	-1.48005
17737246	0.00136268	-1.28416	0.000717196	-1.30542
17856391	0.00136479	-1.97176
17854016	0.00136509	1.3827	0.00371913	1.33598
17691747	0.00136677	1.21896
17713027	0.00136998	-1.62478	6.90164e-05	-1.87597
17678683	0.00137506	-1.70976	0.00381857	-1.6133
17852336	0.00137988	1.51365
17702821	0.00138064	-1.2442
17787121	0.00138749	-1.47618
17833806	0.00138787	-1.27976
17858093	0.00138872	-1.51852
17604933	0.00139013	-1.66116
17880428	0.00139451	-1.63774
17645797	0.00139569	-1.30601
17750225	0.00139946	1.43553
17879988	0.00140577	-1.375	0.00135039	-1.37682
17617927	0.00140647	1.62889
17824172	0.00140818	-1.668	0.000155777	-1.8677
17630272	0.00140905	-1.40723
17690583	0.00141222	-1.49361	0.00285848	-1.44964
17642604	0.00141388	2.16923
17775186	0.00141605	1.91835
17843692	0.00141891	1.39805
17691483	0.0014199	-1.53289
17649952	0.00142173	2.00377	0.00122937	2.02491
17649960	0.00142173	2.00377	0.00122937	2.02491
17649962	0.00142173	2.00377	0.00122937	2.02491
17672519	0.00142347	1.53024
17837395	0.00142692	-1.95255
17775175	0.00142839	-1.27533	0.00267368	-1.25496
17881128	0.00143077	1.41837	1.97702e-06	1.77316
17872079	0.0014317	-1.4689
17674498	0.00143274	-1.42394
17833045	0.00144016	-1.61388
17833370	0.00144284	-1.28652
17632719	0.00144326	1.68872
17864603	0.00144629	-1.78193	0.00123589	-1.79885
17755940	0.00144742	-1.51278	0.000801491	-1.55149
17831494	0.00144964	-1.46723
17719531	0.00145223	1.61133
17602019	0.00145277	-2.94162
17722560	0.00145758	1.55626
17883556	0.00145784	-2.56163	0.00020333	-3.08979
17807275	0.00145835	-1.23825
17821318	0.00145839	-1.25846
17631591	0.00146069	1.23625	7.13494e-05	1.31793
17640535	0.00146296	-1.35808
17807957	0.00146538	-1.4458
17687967	0.00146621	1.49371	0.000535357	1.55703
17860542	0.00146761	-1.82263
17753557	0.00147033	-1.49687
17865588	0.00147548	-1.34664
17727441	0.00148028	-1.34855
17788371	0.00148602	-1.39084
17798817	0.00148687	-1.54838
17852766	0.00148714	1.54457	0.00226446	1.515
17605421	0.00149593	-1.82321
17787848	0.00149795	1.24444
17863382	0.00150523	1.83713	4.44335e-05	2.275
17638514	0.00150796	-1.37321
17836139	0.00151157	-1.95349
17739910	0.00151358	2.46277	0.00176337	2.42728
17652062	0.00151402	-1.45264
17755357	0.00151528	1.28781
17783635	0.00151874	-1.45974
17793457	0.00152158	-3.23194
17743103	0.00152215	1.78302
17740143	0.001529	-1.5987
17716088	0.00153241	-1.28547
17881303	0.00154035	-1.26205
17861833	0.00154264	-1.58368
17700582	0.00154288	1.40956	0.00195477	1.39749
17719419	0.00154669	1.38701
17627179	0.0015477	1.63071	0.000467027	1.73232
17758554	0.00155928	-1.3923
17873457	0.00156404	1.72281
17766058	0.00157102	-1.41865
17880024	0.00157243	1.85471
17635184	0.00157567	1.85035
17810115	0.00157828	1.44591
17825645	0.00158999	1.30147	6.19679e-05	1.4186
17624349	0.00159364	-1.29482
17861007	0.00159471	-1.35506
17882707	0.00159799	1.26198
17675638	0.00160015	1.45103	0.000297343	1.54764
17883270	0.00160042	-1.09538
17673249	0.00160925	-1.19646
17738677	0.00161331	1.22513
17879047	0.00161356	-2.1269
17829530	0.00161655	-1.4794	0.00338233	-1.43396
17619827	0.00161818	1.57566	7.74591e-07	2.21533
17683018	0.00162429	-1.32881	0.000147106	-1.42472
17811259	0.00162707	5.78704	0.00119051	6.13194
17609263	0.00162945	-2.24911
17694060	0.00163799	1.51959
17677875	0.00163855	1.36514	0.000331216	1.43719
17826075	0.001643	-1.33329
17724651	0.00164351	-1.3409	0.00076441	-1.37284
17804158	0.00164405	1.73237
17883157	0.00164837	1.14973
17742399	0.00164883	-1.47138
17679166	0.00165126	-1.44714
17828431	0.00165432	-1.49107
17841297	0.00165716	-1.32555
17633415	0.00165744	-1.21505
17880748	0.00166947	1.46536
17719513	0.00167307	1.51599
17641077	0.00167863	1.43682	0.000547949	1.49905
17707346	0.00168668	1.51684
17798440	0.00169608	1.42314
17856685	0.0016962	-1.18299
17647883	0.00170061	1.50857
17718250	0.0017009	-1.67222
17600125	0.00170422	-2.22677
17830294	0.00170746	-2.05862
17849232	0.00170784	1.97893	7.4388e-06	2.86594
17819003	0.00170891	-1.33494
17692676	0.00171156	-1.3934
17757365	0.00171316	-1.51654
17623800	0.00172095	1.37869	0.000989734	1.40488
17819275	0.00172241	1.8742	0.000120721	2.22427
17822823	0.00172527	1.44903	0.0018608	1.44468
17806407	0.00173478	1.78745
17626974	0.00174182	-1.1799
17733987	0.00174232	2.06475	3.80423e-05	2.73511
17695569	0.00174765	-1.29421
17739778	0.00174776	1.51361	0.00313581	1.47424
17859577	0.0017508	1.50542
17608789	0.00175371	-2.11108	0.00395016	-1.97545
17659755	0.00175435	1.55631
17772816	0.00175629	-1.23949
17769171	0.00175827	1.7889
17816571	0.00176337	1.73601
17601727	0.00176843	-1.65391
17605277	0.0017698	-1.92992
17714779	0.00177342	1.60687
17769576	0.00177373	1.70125	0.000545024	1.81727
17860328	0.00177633	1.24987	4.1239e-06	1.43074
17759656	0.00177772	-1.53409
17603955	0.00177833	-1.84512
17806695	0.00178297	1.77878
17635327	0.00178651	1.50578
17675589	0.00178666	1.65704	0.000235962	1.84285
17726660	0.00179534	-1.37992
17735896	0.00179628	-1.58363
17801861	0.00179815	2.41696	0.000174923	2.99089
17735954	0.00181277	1.32006
17606407	0.00181356	-1.74023
17759587	0.00181747	-1.39744
17656445	0.00181899	-1.51247
17837838	0.00181918	-1.29001
17846763	0.00182507	-1.19715	0.00058984	-1.22316
17631022	0.00182584	-1.58153	0.00252828	-1.55605
17857344	0.00183019	-1.28785	1.47372e-05	-1.45699
17741932	0.00183197	1.94207
17712693	0.00184408	-1.49052
17608395	0.0018477	-1.75561
17799412	0.0018502	-1.89187	0.00199613	-1.88196
17635600	0.00185101	3.44566
17602509	0.00185575	-1.79413
17822238	0.0018577	-1.55106	0.00279006	-1.52108
17648434	0.00186432	-1.36432
17615361	0.00186493	-1.50858	0.00137813	-1.52893
17636396	0.00187693	1.95862	1.23106e-05	2.75843
17724894	0.00187714	1.41465
17610600	0.00187717	-1.19822	2.96347e-05	-1.2936
17853660	0.00187782	1.85172
17859113	0.00188358	-1.37692
17769691	0.00188487	-1.32457	0.000262208	-1.40383
17718684	0.00188889	-1.65996
17855085	0.00189106	2.67154
17633463	0.00189649	-1.35245
17703717	0.00189725	-1.28001
17881843	0.00189804	-1.30601	0.00307684	-1.28762
17684950	0.00189881	-1.28414
17681842	0.00189989	-3.28401
17745289	0.00190196	1.49857
17882217	0.00190753	1.41072
17713681	0.00191153	1.33924
17806940	0.00191166	-1.36425
17663220	0.00191468	1.22437
17750841	0.00191531	1.69577
17769555	0.00191769	1.501	0.000431304	1.60043
17827365	0.00192604	1.57015
17795311	0.00193082	1.38276
17719604	0.00193384	1.35585	0.000123045	1.47951
17664320	0.00193434	-2.05112	0.0030388	-1.9791
17637632	0.00193602	2.10515
17826274	0.00193714	-1.70774
17683752	0.0019377	-1.32257	0.00127045	-1.33955
17731342	0.00193775	-1.41129
17818591	0.00193928	-1.47644
17832907	0.00194078	-1.26185
17824656	0.00194314	-1.69021
17613551	0.00194346	1.84351
17882745	0.00194497	1.37543	0.00120864	1.39815
17674350	0.0019472	1.64431	0.000228058	1.83924
17616319	0.00195033	1.42278
17613830	0.00195671	-1.37039
17786234	0.00196224	1.50421
17841427	0.00196327	1.50926	0.00014459	1.68846
17602719	0.00197288	-2.11705
17843387	0.0019786	-1.20266
17759680	0.00198746	-1.42529
17691263	0.00198836	-1.29102
17738217	0.0019946	-1.41386	0.00077546	-1.46446
17750731	0.00199515	-1.25387
17702490	0.00200114	-1.61189
17854433	0.00200376	-2.40769
17774526	0.00200526	1.50389
17724532	0.00200639	1.52532
17863116	0.00200836	1.4748
17814271	0.0020095	1.9521
17849256	0.00201287	-1.37216
17639077	0.00201299	-1.32846
17651069	0.00201854	1.53516
17768226	0.00202038	1.47748	0.00130325	1.50523
17635616	0.00202127	2.13765
17881559	0.00202317	-1.43286
17685608	0.00202319	1.80368
17699263	0.00203441	-1.99153
17618570	0.00203538	1.66888
17858546	0.00203923	1.3733	0.00314647	1.35249
17723224	0.00204269	1.61009
17723523	0.00204723	1.52869
17631477	0.00204763	-1.87238
17835724	0.00205191	1.78041
17605995	0.00205316	-1.91548
17781213	0.00205373	2.31431
17852294	0.00205792	-1.80526
17736667	0.00206578	-1.21267
17824799	0.00206801	-2.23945	0.00295562	-2.16897
17838221	0.00207605	2.1333
17636532	0.00207753	-1.23865
17702101	0.00208144	1.33106
17689286	0.00208861	1.20698
17772693	0.00209374	-1.78445
17676646	0.00210765	1.3888	0.00166473	1.40068
17700158	0.00210935	1.32511
17760801	0.00211165	-1.41333	1.83338e-05	-1.6742
17861873	0.00211534	-1.30088
17631646	0.00211563	-1.28278
17721057			7.3395e-11	4.39454
17792684			3.36659e-10	1.66312
17637528			4.53337e-10	2.1009
17823218			6.09021e-10	5.23312
17849243			9.42484e-10	5.41325
17754983			1.2142e-09	3.09809
17871099			1.69149e-09	3.88291
17714452			1.84314e-09	1.91044
17700688			1.96169e-09	3.42067
17735924			1.96492e-09	24.8473
17813552			2.77756e-09	5.21054
17809602			2.80801e-09	2.42133
17689310			3.31505e-09	5.79597
17748494			3.52244e-09	3.13315
17854612			5.91384e-09	6.74669
17805646			6.96818e-09	43.1512
17667237			7.46821e-09	9.76819
17767085			7.65171e-09	85.2345
17631385			8.15854e-09	3.61172
17764597			9.01556e-09	23.7881
17704157			9.13934e-09	57.8098
17863213			1.01903e-08	69.8722
17778010			1.0227e-08	75.4196
17709835			1.02359e-08	1.65148
17639986			1.04554e-08	8.68691
17760025			1.12796e-08	108.825
17778005			1.16433e-08	77.9131
17703695			1.2648e-08	144.709
17756404			1.42927e-08	68.8134
17825279			1.48029e-08	29.4911
17760098			1.50778e-08	154.781
17811292			1.52254e-08	1.81604
17758189			1.56995e-08	9.15781
17699521			1.62929e-08	96.3223
17825799			1.68184e-08	3.60804
17691617			1.75347e-08	2.72518
17775062			1.82274e-08	3.42655
17850931			1.8629e-08	143.308
17779108			1.88568e-08	3.01669
17845302			1.9738e-08	2.04566
17882741			2.124e-08	65.5877
17843061			2.12557e-08	66.7046
17767091			2.21528e-08	57.3126
17739859			2.27569e-08	2.15455
17712738			2.35273e-08	75.9794
17704086			2.43503e-08	131.959
17767309			2.59286e-08	15.6579
17715886			2.65803e-08	111.023
17685367			2.68193e-08	92.0954
17777521			2.78845e-08	1.59312
17736177			3.01129e-08	2.25388
17630489			3.01386e-08	4.30513
17635957			3.07868e-08	51.2397
17732347			3.1532e-08	1.52287
17882723			3.27124e-08	10.994
17723973			3.47202e-08	-1.99419
17670575			3.48468e-08	22.3344
17828413			3.64219e-08	1.77085
17752821			3.95194e-08	52.5423
17881515			4.05077e-08	8.44887
17878914			4.23349e-08	12.876
17698119			4.43333e-08	58.7503
17712112			4.59465e-08	2.58376
17789932			4.60224e-08	3.12308
17666684			4.85784e-08	5.54273
17663641			5.02121e-08	48.1752
17791383			6.00545e-08	3.01191
17811491			6.05136e-08	12.3602
17816867			6.09007e-08	2.62584
17758690			6.15658e-08	19.1869
17881913			6.25598e-08	37.1732
17702063			6.31116e-08	2.58309
17866228			6.34986e-08	12.1422
17778340			6.40079e-08	49.5214
17669974			6.44417e-08	4.73
17650407			6.99051e-08	17.8462
17666436			7.03746e-08	9.38457
17766478			7.18388e-08	4.22034
17658916			7.28581e-08	16.0568
17690484			7.3175e-08	3.80062
17778336			7.32674e-08	7.37335
17663630			7.38007e-08	11.8733
17752811			7.48026e-08	1.97154
17878226			7.89627e-08	4.78043
17617612			8.42184e-08	9.88233
17667478			8.45659e-08	30.7679
17797492			9.18314e-08	16.2141
17773233			9.23304e-08	10.9581
17798926			9.26772e-08	2.25345
17722920			9.67739e-08	16.1849
17760041			1.02724e-07	16.6175
17803516			1.02922e-07	15.0789
17732734			1.06213e-07	2.54244
17850334			1.06924e-07	1.85326
17699515			1.0837e-07	35.8706
17876157			1.10353e-07	15.0138
17741105			1.1323e-07	1.41945
17749443			1.1711e-07	11.4426
17740082			1.18736e-07	1.75593
17715083			1.19988e-07	3.15829
17810274			1.24415e-07	17.2336
17763179			1.26345e-07	3.88786
17881841			1.29128e-07	2.63259
17828777			1.29439e-07	11.1113
17798642			1.34587e-07	3.27578
17768324			1.36515e-07	68.9104
17875144			1.39245e-07	3.66105
17709019			1.47327e-07	75.7884
17602465			1.62222e-07	-3.53819
17626665			1.62277e-07	10.9312
17664328			1.76685e-07	20.9142
17644419			1.78871e-07	1.7395
17861019			1.80428e-07	4.26898
17805132			1.89596e-07	2.26421
17836379			1.90761e-07	1.70013
17844081			1.9841e-07	-1.90252
17779231			2.03817e-07	12.0439
17809498			2.06139e-07	11.7802
17882667			2.10864e-07	5.84605
17806641			2.13987e-07	2.66259
17866937			2.19396e-07	1.91528
17756437			2.2798e-07	14.3555
17661706			2.48919e-07	6.17078
17863229			2.56501e-07	8.89562
17705225			2.56664e-07	8.5955
17799179			2.62863e-07	2.19508
17854352			2.72731e-07	4.12283
17719197			2.77479e-07	6.66866
17769633			2.78324e-07	9.20599
17683259			2.84677e-07	6.15389
17840296			2.85502e-07	1.76258
17871605			2.88162e-07	2.1806
17824691			2.90998e-07	13.0862
17702089			3.14104e-07	23.2398
17861254			3.18884e-07	2.70679
17757820			3.21617e-07	7.8867
17651928			3.25546e-07	3.11613
17855446			3.29339e-07	3.26265
17681515			3.33956e-07	9.31639
17634095			3.38435e-07	5.24833
17673587			3.46213e-07	3.61152
17796778			3.49515e-07	1.92917
17685342			3.52969e-07	1.56494
17802816			3.57541e-07	4.25554
17744528			3.68971e-07	2.34101
17620634			3.69961e-07	2.17701
17732321			3.82343e-07	3.81754
17807172			3.87413e-07	2.09446
17731895			4.03877e-07	3.22389
17726747			4.05701e-07	2.27294
17778628			4.06459e-07	2.19161
17746022			4.20989e-07	3.41478
17688485			4.21758e-07	18.8566
17794404			4.26949e-07	7.2623
17846148			4.27137e-07	4.40296
17639991			4.35887e-07	6.0516
17796638			4.39701e-07	2.10255
17878725			5.17476e-07	2.75888
17694385			5.30044e-07	5.52864
17656767			5.46624e-07	5.77696
17800600			5.48123e-07	1.79871
17679423			5.69825e-07	3.96269
17863056			5.73085e-07	2.57994
17855076			5.80236e-07	1.44877
17815588			6.60575e-07	3.21159
17882005			6.79136e-07	18.3539
17658054			6.85872e-07	3.6289
17622891			7.01604e-07	1.80507
17875511			7.137e-07	3.00876
17644425			7.27949e-07	2.59719
17804270			7.28649e-07	1.98044
17793880			7.29983e-07	1.52506
17798715			7.35549e-07	2.07367
17650425			7.51623e-07	1.98123
17830414			7.76908e-07	1.92572
17640560			7.77948e-07	2.60406
17614194			7.78523e-07	4.82469
17683339			7.94248e-07	3.86089
17867946			8.08292e-07	2.04743
17729962			8.27664e-07	3.08172
17762720			8.63483e-07	6.56918
17711542			8.77419e-07	-2.60854
17616389			9.01984e-07	2.59015
17866187			9.40726e-07	2.43173
17738441			9.82795e-07	5.19257
17840794			9.871e-07	3.57381
17791796			9.95058e-07	4.74675
17664107			1.00109e-06	6.57902
17705205			1.00755e-06	7.51419
17702607			1.03943e-06	1.80058
17757010			1.04796e-06	1.58536
17707729			1.05384e-06	2.77675
17844689			1.09611e-06	1.63249
17760057			1.12121e-06	38.5173
17739425			1.13185e-06	4.69235
17811455			1.13506e-06	1.41879
17817427			1.1534e-06	1.75703
17622887			1.17721e-06	5.41894
17865725			1.19509e-06	1.61636
17864114			1.19792e-06	4.45593
17767371			1.24493e-06	18.8219
17624812			1.26961e-06	14.6687
17776300			1.29815e-06	-1.95566
17827443			1.31154e-06	1.59224
17673745			1.3342e-06	3.27927
17760013			1.33448e-06	1.51863
17801781			1.34112e-06	1.71406
17756825			1.35219e-06	2.84659
17874240			1.35373e-06	2.18729
17800390			1.36552e-06	2.37721
17747536			1.46678e-06	2.10694
17860769			1.48846e-06	2.66846
17863226			1.50528e-06	4.84872
17702604			1.52842e-06	2.01925
17831510			1.57024e-06	4.20625
17882089			1.57349e-06	1.84132
17805008			1.61483e-06	-1.70367
17658629			1.63766e-06	1.94892
17658637			1.75816e-06	13.045
17632379			1.77487e-06	2.04361
17696819			1.79291e-06	2.34132
17774051			1.85791e-06	7.34253
17748690			1.88316e-06	4.86466
17793809			1.90581e-06	1.64563
17850757			1.90783e-06	4.24665
17762269			1.97737e-06	3.82801
17648971			1.97843e-06	1.76376
17696705			2.09086e-06	-2.15027
17674342			2.09336e-06	4.50716
17817115			2.12173e-06	-2.3082
17704136			2.18125e-06	6.39267
17646169			2.19174e-06	2.21162
17742464			2.19212e-06	2.06945
17728701			2.22658e-06	2.20829
17815693			2.23152e-06	2.65949
17622863			2.28093e-06	1.6118
17731681			2.28513e-06	2.27322
17760548			2.32478e-06	3.86071
17705239			2.34811e-06	7.71631
17857692			2.35871e-06	2.70796
17657933			2.36732e-06	2.2797
17735357			2.37541e-06	12.5396
17753678			2.37699e-06	1.42715
17797354			2.39584e-06	-1.84665
17659429			2.43435e-06	-2.09008
17843475			2.50598e-06	-1.83671
17854989			2.51926e-06	-1.56659
17608417			2.52745e-06	-2.24081
17815482			2.56867e-06	5.9078
17702603			2.57435e-06	1.76156
17651901			2.64183e-06	-1.72194
17882421			2.68908e-06	4.75304
17801432			2.78255e-06	2.51935
17882399			2.96747e-06	7.32702
17748627			2.9727e-06	1.70717
17862402			2.97726e-06	1.7255
17850369			2.99381e-06	-1.80702
17755212			3.02766e-06	6.9354
17828155			3.04421e-06	3.91214
17880281			3.04999e-06	-1.75201
17846830			3.05329e-06	5.93365
17776430			3.1243e-06	5.75594
17689862			3.13875e-06	1.67136
17655314			3.19602e-06	1.63276
17807094			3.20564e-06	2.30686
17702682			3.2608e-06	-1.63566
17783921			3.30005e-06	3.28161
17842323			3.36198e-06	3.68365
17810919			3.4356e-06	4.32858
17668062			3.5326e-06	1.85421
17843000			3.61829e-06	1.63717
17872173			3.72335e-06	1.99633
17725574			3.74581e-06	1.91097
17742667			3.82919e-06	9.41361
17617131			3.84732e-06	5.92499
17677169			3.94974e-06	1.59258
17686641			3.98974e-06	1.44987
17748786			4.1832e-06	2.19331
17643087			4.18589e-06	7.71101
17637077			4.28158e-06	2.37915
17777003			4.39344e-06	3.46971
17668012			4.46336e-06	1.86998
17734874			4.46485e-06	1.84928
17799894			4.62135e-06	3.75075
17728106			4.63361e-06	3.23328
17823363			4.63969e-06	1.66228
17770793			4.66715e-06	1.54383
17647752			4.79228e-06	1.6707
17723879			4.91737e-06	3.09678
17706882			5.15963e-06	1.38323
17871209			5.24737e-06	2.04741
17718168			5.25716e-06	1.71713
17792566			5.4255e-06	2.02041
17741566			5.44058e-06	3.59859
17740954			5.4547e-06	-1.93506
17822697			5.55667e-06	3.15552
17736233			5.56326e-06	-1.85701
17620772			5.58136e-06	2.24456
17825345			5.58606e-06	2.71616
17610750			5.59505e-06	7.22569
17832060			5.59762e-06	5.82509
17644552			5.63722e-06	-1.47364
17765453			5.65146e-06	1.85345
17813015			5.89017e-06	5.10817
17739800			5.90593e-06	2.02688
17686658			6.04953e-06	1.34047
17708927			6.0513e-06	1.76393
17748240			6.12287e-06	-1.7855
17854897			6.13824e-06	-1.73473
17625194			6.1546e-06	2.19975
17671549			6.19766e-06	6.36148
17680295			6.28004e-06	1.8527
17780805			6.416e-06	1.44714
17796482			6.54949e-06	2.23123
17769819			6.57419e-06	-1.97407
17799203			6.63346e-06	3.29855
17764218			6.65286e-06	2.30853
17779039			6.6589e-06	2.64476
17796627			6.69758e-06	1.66727
17761597			6.72095e-06	2.22115
17685482			6.78405e-06	3.70257
17795302			7.07352e-06	2.59725
17839326			7.09517e-06	-1.60298
17768072			7.31759e-06	2.01205
17765048			7.43274e-06	3.80401
17676588			7.70195e-06	2.27964
17635213			7.72304e-06	1.98497
17669576			7.78928e-06	1.79879
17767380			7.91601e-06	3.49522
17834031			8.02297e-06	1.81797
17878664			8.11432e-06	-1.68042
17776731			8.22919e-06	3.18829
17718648			8.30421e-06	1.61941
17710958			8.40645e-06	1.67932
17643566			8.57339e-06	3.5578
17670084			9.10445e-06	3.46504
17855158			9.16003e-06	1.51708
17831297			9.22745e-06	7.05577
17658050			9.25185e-06	1.78636
17831209			9.37929e-06	2.7842
17650310			9.41895e-06	1.56264
17680182			9.43544e-06	2.93641
17689536			9.49338e-06	1.92646
17705532			9.52427e-06	1.9895
17814329			9.57723e-06	1.7008
17664422			9.76091e-06	-1.63421
17714181			1.01448e-05	-2.0605
17803461			1.01486e-05	2.07173
17791157			1.08191e-05	2.46055
17762810			1.08197e-05	-1.79642
17660784			1.11041e-05	2.5953
17730504			1.12019e-05	1.52913
17615800			1.12403e-05	3.02259
17710889			1.13029e-05	1.80715
17783651			1.13845e-05	4.20946
17853855			1.14543e-05	11.5597
17611955			1.15666e-05	-1.88403
17828757			1.17667e-05	4.18977
17707152			1.1773e-05	1.69937
17654306			1.18712e-05	1.83664
17637841			1.20895e-05	1.74126
17881407			1.21313e-05	-1.96966
17698131			1.21928e-05	2.88004
17740786			1.24395e-05	1.98868
17776543			1.24784e-05	1.92178
17855233			1.26375e-05	4.45011
17686721			1.27349e-05	1.64079
17880546			1.33357e-05	2.0055
17881357			1.3483e-05	11.3342
17848495			1.36654e-05	2.31206
17712413			1.37218e-05	1.56668
17753567			1.38439e-05	2.68168
17611159			1.38977e-05	4.30866
17812204			1.41496e-05	2.35637
17747727			1.43071e-05	2.05033
17851399			1.43486e-05	-2.01676
17831371			1.43875e-05	1.49099
17802652			1.46014e-05	1.73636
17647616			1.46258e-05	4.88972
17702605			1.47895e-05	1.71498
17640120			1.50766e-05	1.53631
17882703			1.53315e-05	-1.87908
17731360			1.53692e-05	-1.97938
17801447			1.54503e-05	-1.87531
17621659			1.54957e-05	1.75541
17693408			1.55346e-05	-1.38874
17691449			1.56122e-05	3.33616
17654148			1.56461e-05	2.09679
17776388			1.61409e-05	2.56302
17622829			1.6184e-05	1.75726
17631398			1.62993e-05	4.79707
17851140			1.63464e-05	-1.31323
17867288			1.63571e-05	-1.19512
17716920			1.64412e-05	2.74359
17754627			1.64641e-05	1.67921
17805837			1.64738e-05	4.88003
17691011			1.65069e-05	1.76396
17689302			1.70069e-05	2.5326
17617588			1.71072e-05	3.29113
17819862			1.71445e-05	3.3636
17881825			1.73471e-05	1.95709
17801990			1.76736e-05	-1.5668
17854165			1.77946e-05	2.38053
17670177			1.78056e-05	2.16357
17691721			1.78729e-05	-1.36811
17877062			1.79007e-05	6.471
17637216			1.82044e-05	-1.73645
17626435			1.82048e-05	3.91833
17836566			1.8249e-05	-1.35248
17712038			1.83793e-05	2.45668
17664120			1.84482e-05	3.72016
17856700			1.84513e-05	2.52632
17829163			1.876e-05	-1.98337
17678894			1.87899e-05	1.75983
17827262			1.88082e-05	2.83449
17846579			1.88233e-05	2.10166
17846471			1.89534e-05	1.48011
17654204			1.91631e-05	1.62691
17877980			1.96594e-05	-2.20551
17730619			2.02442e-05	1.79137
17835758			2.03683e-05	-3.25523
17730769			2.04498e-05	2.57821
17670481			2.05419e-05	1.59629
17748728			2.0718e-05	4.3838
17833113			2.12999e-05	2.39841
17636391			2.13343e-05	1.9026
17634147			2.13813e-05	1.46459
17828842			2.16432e-05	2.17583
17653763			2.18494e-05	3.7282
17615342			2.18823e-05	1.78152
17842335			2.2121e-05	1.66912
17875207			2.23793e-05	2.0965
17704112			2.23856e-05	1.72917
17751413			2.34106e-05	2.74134
17689397			2.35973e-05	1.77901
17818835			2.36187e-05	-1.44243
17656277			2.39371e-05	-3.87677
17822812			2.40374e-05	3.22582
17780018			2.40417e-05	1.83177
17821605			2.40743e-05	1.83131
17860022			2.42297e-05	1.8283
17682828			2.44124e-05	2.26782
17677887			2.4433e-05	1.51607
17882645			2.44736e-05	1.40935
17870216			2.45474e-05	1.5039
17677879			2.5093e-05	1.71975
[truncated: 1,730 more rows]

## Sheet: TableS5f
Column ID	p-value(PLZF * LIVER * CTL vs. PLZF * LIVER * PROG)	Fold-Change(PLZF * LIVER * PROG vs. PLZF * LIVER * CTL)	p-value(SHR * LIVER * CTL vs. SHR * LIVER * PROG)	Fold-Change(SHR * LIVER * PROG vs. SHR * LIVER * CTL)
17658161	1.87455e-12	1.92547	9.7095e-15	2.19974
17867318	2.28888e-11	-1.34541	6.05614e-07	-1.20736
17768109	4.837e-11	4.38755	6.18648e-10	3.79827
17817308	5.02159e-11	8.89363	6.59258e-14	16.2482
17883213	1.44896e-10	14.5927	1.12263e-10	14.9989
17883562	1.45741e-10	-8.38288	7.821e-09	-6.02808
17883512	2.28668e-10	-5.38426	2.81297e-11	-6.22659
17883566	3.22293e-09	-4.78761	1.32449e-12	-8.42901
17883514	3.57523e-09	-4.90613	4.14007e-11	-6.7588
17788861	4.64931e-09	-3.03233	4.87933e-06	-2.17686
17635765	4.95984e-09	2.38218	3.86575e-12	3.18251
17883530	5.26869e-09	-7.90469	1.73382e-09	-8.75851
17883510	5.88811e-09	-4.5324	1.4756e-09	-4.97835
17867324	6.79773e-09	15.9483	9.74828e-09	15.2534
17867298	6.85624e-09	-1.4108	2.11008e-07	-1.33946
17726394	7.26909e-09	1.84862	0.00338159	1.29307
17785028	9.36935e-09	-2.28675	0.00113472	-1.48353
17883560	1.09068e-08	-5.10942	5.49495e-09	-5.37675
17883564	1.57417e-08	-4.7942	1.08767e-09	-5.83084
17867332	2.74493e-08	4.26371	3.53526e-10	5.77819
17881795	2.90839e-08	2.09588	3.74258e-10	2.44836
17880180	3.04912e-08	-2.55824	7.6064e-09	-2.7217
17784218	4.1637e-08	2.10566
17834793	4.36243e-08	1.57493
17694791	4.63838e-08	2.05067	1.92498e-06	1.80627
17883568	4.73556e-08	-5.37055	6.51159e-08	-5.23453
17697315	6.30403e-08	-2.54807
17753249	7.29808e-08	1.57316	6.207e-10	1.75267
17809012	7.66521e-08	-3.26543	3.53817e-10	-4.49787
17693834	8.56065e-08	-1.95909
17883502	9.39916e-08	-3.81753	1.03087e-06	-3.26179
17883183	1.03788e-07	3.12953	1.52707e-09	3.99142
17719967	1.08617e-07	-6.76652	1.87852e-09	-10.0181
17706861	1.23445e-07	1.78901	3.08693e-08	1.86288
17758582	2.01134e-07	2.12335	5.81215e-07	2.03872
17883157	2.07588e-07	-1.29972	1.55894e-06	-1.26522
17733740	2.11717e-07	-2.04784
17692997	2.1268e-07	-2.21274	1.2296e-09	-2.74086
17883506	2.20678e-07	-4.71758	2.23072e-07	-4.71353
17624214	2.25923e-07	-1.81423	4.84143e-09	-2.04386
17822248	2.86329e-07	-1.43824	5.79589e-05	-1.30115
17833380	2.88644e-07	1.57015	1.62781e-05	1.42901
17883163	3.66808e-07	-1.17838	1.28315e-08	-1.2133
17601595	3.87147e-07	2.28231
17883758	3.90149e-07	-3.80764	7.66898e-07	-3.63096
17883540	4.61756e-07	-3.80169	2.99206e-08	-4.62243
17883558	5.05729e-07	-3.00756	2.71195e-09	-4.1114
17792806	5.5332e-07	3.13562	0.000103669	2.27184
17819927	5.77003e-07	1.82698	0.000819398	1.43796
17883716	6.57684e-07	-5.02622	7.15001e-07	-4.98971
17880086	6.67501e-07	1.64367	4.35855e-07	1.66262
17631448	6.74137e-07	2.4087
17643255	7.09219e-07	1.55651	7.74793e-08	1.64188
17794572	7.35373e-07	1.97873
17630183	7.75747e-07	-1.84962	0.00280745	-1.39203
17880979	7.89846e-07	-1.57898
17632902	8.24996e-07	1.75039
17867316	8.81738e-07	-1.34314
17681787	9.26106e-07	-2.14942	0.000269337	-1.6874
17728574	9.27977e-07	1.46204
17617349	9.29021e-07	-4.16136	1.89686e-05	-3.28297
17681327	9.92073e-07	4.22007	1.9289e-07	4.80845
17689022	1.01295e-06	-2.25357	1.85977e-11	-3.76683
17644205	1.03043e-06	2.20309	6.1892e-11	3.42712
17883504	1.11486e-06	-3.95306	4.90398e-07	-4.20916
17867548	1.17912e-06	2.75937	0.000861521	1.88333
17640323	1.19845e-06	-1.88067	1.21702e-07	-2.03909
17883310	1.33662e-06	-4.60331	2.84617e-06	-4.31464
17746815	1.34674e-06	-2.62641	4.11417e-06	-2.47209
17883508	1.34732e-06	-4.52661	1.01036e-06	-4.63843
17651093	1.47275e-06	1.62073	0.000161444	1.42388
17883500	1.51699e-06	-2.80787	1.1799e-07	-3.26074
17828592	1.53266e-06	-3.55772	0.0029513	-2.0234
17883528	1.53873e-06	-4.52711	3.61263e-06	-4.20877
17623254	1.69252e-06	2.03595	2.45028e-05	1.82669
17883618	1.70994e-06	-4.38011	1.64574e-06	-4.39422
17748626	1.72523e-06	1.72977	0.000118213	1.51397
17883175	1.74624e-06	-1.21459	0.00233731	-1.11818
17849630	1.75787e-06	-1.40716
17883556	1.88768e-06	-4.70486	1.28916e-06	-4.86657
17839416	1.88888e-06	1.57805	3.55153e-11	2.12165
17676654	1.9277e-06	2.40338
17792684	1.92891e-06	1.40075	1.15412e-05	1.3531
17883526	2.05544e-06	-5.47267	5.79481e-07	-6.194
17867288	2.17926e-06	-1.22358	7.56428e-07	-1.23875
17697409	2.32458e-06	-2.90673	1.24245e-06	-3.02146
17647752	2.37512e-06	1.70751	9.58653e-06	1.63504
17883552	2.43667e-06	-4.10863	2.05739e-06	-4.16607
17841133	2.68578e-06	-2.84583
17636380	2.80902e-06	-1.83245	0.0002355	-1.56207
17630090	2.97623e-06	-2.0532	1.68262e-06	-2.1033
17883550	3.00766e-06	-2.36028	1.84477e-09	-3.45103
17881002	3.58551e-06	-1.66551
17682824	3.67743e-06	2.33508	5.00369e-08	2.90331
17732347	3.84017e-06	1.38614	3.83866e-05	1.32494
17623111	4.27935e-06	1.63567	3.03008e-06	1.65245
17867599	4.84028e-06	1.73924	2.80972e-05	1.63919
17791781	4.92467e-06	-3.82495	0.000499071	-2.6038
17683530	4.98179e-06	-1.89916	0.000490667	-1.5818
17883312	5.00894e-06	-3.78016	3.1492e-06	-3.92438
17601933	5.01166e-06	-3.76129	0.00278233	-2.21211
17829646	5.28082e-06	-4.15178	4.43515e-10	-9.5329
17883169	5.36935e-06	-1.20642	0.000355066	-1.14879
17729116	5.54424e-06	1.67486
17883308	5.56807e-06	-3.82312	5.0553e-06	-3.85352
17632781	5.86026e-06	2.21073	2.04841e-05	2.0797
17707485	5.89956e-06	-2.77734	2.28857e-11	-6.25042
17640264	6.05308e-06	1.4732	4.0521e-11	1.97583
17883532	6.19988e-06	-4.13804	1.84922e-05	-3.75991
17876151	6.45423e-06	-1.70262
17778431	6.499e-06	1.48793	0.000836509	1.31613
17605699	6.59266e-06	-2.68378
17883548	6.75535e-06	-3.9659	2.06611e-06	-4.38677
17757020	6.87465e-06	1.72143
17838036	6.92579e-06	-2.33803
17881044	6.9867e-06	-1.55812	3.1551e-07	-1.69648
17815607	7.04125e-06	2.09215
17735497	7.38021e-06	1.66853
17839529	7.98398e-06	1.84967	1.22177e-05	1.81958
17877587	8.39748e-06	1.32615
17725159	8.50038e-06	1.42374	6.94034e-07	1.50497
17708246	8.57695e-06	-1.48838
17869970	8.90367e-06	-2.63092
17831890	9.27232e-06	-1.56157	0.00245761	-1.32505
17602573	9.63695e-06	2.6429
17817740	1.00581e-05	-1.42646	0.000278323	-1.32153
17861862	1.12395e-05	-4.70421	6.56196e-06	-4.96191
17881004	1.12434e-05	-1.44734
17741781	1.2067e-05	1.7424
17861575	1.22132e-05	2.11755	0.000148945	1.87323
17883524	1.24013e-05	-4.12339	8.30108e-06	-4.27736
17747493	1.27757e-05	1.50458
17682147	1.31596e-05	1.57764	0.000140314	1.46975
17883153	1.40244e-05	-1.29309	4.36773e-05	-1.26861
17807875	1.41845e-05	2.46859
17752800	1.45389e-05	-2.12956	7.63585e-06	-2.19818
17604503	1.49359e-05	-3.18154
17605341	1.58034e-05	2.43702	0.00163339	1.83833
17686592	1.62709e-05	1.85085	4.35903e-06	1.95192
17737663	1.68321e-05	-2.18744	0.000390532	-1.85308
17710896	1.68745e-05	-2.15245	5.75484e-05	-2.02212
17738555	1.71551e-05	-1.43473	0.000130651	-1.36613
17801264	1.77237e-05	-2.62662
17641603	1.79587e-05	-1.2925	2.3999e-05	-1.28613
17787105	1.80343e-05	1.41463	1.44996e-09	1.75985
17731459	1.83301e-05	1.42458
17690116	1.86014e-05	-3.43424	3.39078e-05	-3.26873
17609907	1.90477e-05	-2.16735
17771188	1.92476e-05	1.39101	5.07122e-08	1.58411
17730290	1.93609e-05	1.52104	7.78593e-05	1.46254
17698469	1.94076e-05	1.48224
17620655	1.96341e-05	1.79813
17844654	2.01081e-05	-1.33619	0.000261022	-1.27034
17797030	2.04593e-05	1.29501	1.31395e-08	1.4703
17786945	2.15078e-05	1.94387	6.80276e-06	2.04602
17751462	2.17169e-05	2.628	2.67821e-07	3.48914
17683012	2.21684e-05	-1.56295	0.000684383	-1.40576
17792498	2.2245e-05	-2.20764
17754515	2.2473e-05	-1.63185	0.00193243	-1.40007
17777521	2.25254e-05	1.37895	2.74441e-05	1.37305
17604761	2.25653e-05	2.03366	0.00120578	1.66988
17749838	2.26035e-05	-1.98632
17735412	2.26569e-05	1.60432
17811292	2.26622e-05	1.49198	1.41487e-06	1.60709
17720423	2.28839e-05	-3.32291	2.26249e-12	-12.9886
17605769	2.31595e-05	3.31208	3.18081e-07	4.67289
17648894	2.32661e-05	2.29304	1.56668e-05	2.34441
17818495	2.33263e-05	1.41776
17802849	2.34652e-05	-2.31387	0.00239142	-1.75888
17787961	2.37156e-05	-2.80815	1.18223e-06	-3.45736
17754283	2.37889e-05	1.41252
17683821	2.39734e-05	-1.77565	1.13859e-08	-2.38927
17625749	2.4359e-05	1.64226	0.00229594	1.39974
17720025	2.4597e-05	-1.59789	0.000418441	-1.45724
17809643	2.48731e-05	2.28074	2.27758e-05	2.29202
17723996	2.49957e-05	-1.71803
17639720	2.52039e-05	1.46823	7.9426e-10	1.92812
17870184	2.5464e-05	-3.90437	0.00109251	-2.72358
17815372	2.60447e-05	1.88969
17882985	2.60447e-05	1.88969
17880216	2.66676e-05	-1.57588	0.00016452	-1.48819
17757010	2.69165e-05	1.45896	1.11395e-08	1.78265
17755232	2.70521e-05	-1.56922
17856942	2.71296e-05	-2.31338
17881717	2.727e-05	3.74302	4.30727e-10	10.2461
17736550	2.73076e-05	-1.33594	7.28639e-05	-1.31004
17769015	2.87802e-05	-2.37218
17857994	2.87859e-05	-2.12983	4.24531e-07	-2.64593
17674934	2.92185e-05	-2.42767
17674936	2.92185e-05	-2.42767
17674938	2.92185e-05	-2.42767
17882811	2.92185e-05	-2.42767
17882813	2.92185e-05	-2.42767
17882815	2.92185e-05	-2.42767
17710304	2.94548e-05	2.27774	0.000657637	1.90118
17652670	2.94667e-05	-1.84114
17791267	2.94772e-05	1.70433
17792564	2.96603e-05	1.48726	0.00011508	1.43263
17681025	3.03117e-05	5.30303	5.43492e-07	8.38627
17857034	3.07577e-05	-2.01987
17793173	3.13747e-05	-1.30705
17878553	3.1644e-05	2.58581
17739597	3.19352e-05	-1.68088	1.16368e-05	-1.7428
17625804	3.20384e-05	2.01489
17621010	3.3572e-05	1.33439	7.31761e-07	1.43972
17880961	3.40011e-05	-1.56251
17748676	3.49235e-05	1.69996	0.000380985	1.55325
17663208	3.52972e-05	1.57817
17676212	3.53665e-05	-2.26065	1.56651e-07	-3.06818
17755002	3.60716e-05	2.10109
17883498	3.75803e-05	-3.30077	1.66042e-06	-4.27567
17845869	3.89008e-05	4.50279
17856939	3.92136e-05	-2.75573	4.06626e-07	-3.80389
17700015	3.92346e-05	1.68329	1.27537e-06	1.90608
17702377	4.14095e-05	-1.42984
17800037	4.15345e-05	-1.74607
17832217	4.21468e-05	-1.68734
17640120	4.21515e-05	1.49234	6.7127e-08	1.7878
17743078	4.21887e-05	1.47271	2.92183e-05	1.48761
17624005	4.31459e-05	-1.62403
17635813	4.33011e-05	1.34517
17830106	4.34367e-05	1.57875	2.44315e-06	1.7315
17828565	4.34445e-05	1.35794	8.63691e-08	1.55198
17686724	4.37014e-05	1.5038
17600399	4.38769e-05	-4.03082
17718262	4.42381e-05	-1.56948	2.3503e-05	-1.60155
17745158	4.4582e-05	1.49301
17701554	4.47309e-05	-1.9257
17880279	4.47954e-05	1.51365	5.5654e-06	1.6089
17878133	4.53575e-05	-1.97061	2.64037e-11	-3.99406
17849232	4.5405e-05	2.54327	0.000236834	2.27494
17814348	4.61189e-05	-1.3694
17653783	4.67332e-05	1.41255
17636967	4.70759e-05	1.42062
17855538	4.85012e-05	1.95219	0.000176274	1.83377
17789710	4.89655e-05	-2.08797
17835987	4.96765e-05	1.70281	2.00356e-07	2.09622
17825971	5.04424e-05	-1.40689
17630268	5.13787e-05	-1.39733
17647366	5.14033e-05	1.5082	1.12012e-12	2.5922
17781286	5.15253e-05	-2.28431	4.54927e-12	-6.16583
17677071	5.17165e-05	1.34658	2.66893e-08	1.58082
17702293	5.30314e-05	-1.95431
17759752	5.30394e-05	-1.48272
17689080	5.35264e-05	-1.79953	1.55034e-11	-3.45144
17874414	5.36858e-05	1.56776
17754196	5.43496e-05	-2.04933	4.54846e-05	-2.06837
17708329	5.63344e-05	1.4509	2.84073e-06	1.57132
17838221	5.69694e-05	2.83264
17779286	5.77623e-05	1.68739	0.00093149	1.51316
17870567	5.79954e-05	-1.51703
17734841	5.88202e-05	1.51062	0.00133494	1.37079
17882177	5.95012e-05	-1.38076
17883161	6.00061e-05	-1.14593	0.000112106	-1.13879
17773118	6.03429e-05	3.49034
17769602	6.06487e-05	-1.52675
17774886	6.08778e-05	1.6887	5.63005e-07	2.01479
17801541	6.11178e-05	1.46323	1.66331e-12	2.41267
17846846	6.26317e-05	-1.62127	8.57525e-06	-1.73835
17801263	6.31898e-05	-2.3718	1.26131e-07	-3.49377
17821641	6.3481e-05	-1.64182
17755745	6.39758e-05	1.46328	0.000112037	1.44042
17771742	6.47267e-05	-2.01528	0.00220749	-1.66734
17742458	6.60417e-05	2.46659	1.48846e-07	3.6735
17839571	6.75629e-05	-1.42629
17858996	6.87122e-05	-1.97719
17667800	7.11502e-05	-1.30706
17629701	7.13302e-05	1.77333	0.000242217	1.68256
17637039	7.14232e-05	-1.52163
17719926	7.29908e-05	-2.28127	9.89008e-06	-2.57512
17844984	7.32512e-05	1.92536	0.00032837	1.78776
17634240	7.34559e-05	-1.39819	4.33117e-05	-1.41667
17703570	7.45235e-05	-1.42965	4.93389e-07	-1.62985
17826513	7.76476e-05	1.65667	6.06605e-06	1.82155
17819041	7.77271e-05	-1.70714	4.1761e-06	-1.91547
17801437	7.8923e-05	1.34974	0.000894788	1.27626
17753392	8.00638e-05	-1.49241
17702407	8.15501e-05	-1.72445	0.00335835	-1.47012
17603329	8.2128e-05	2.91278	0.000128194	2.81001
17736120	8.3269e-05	1.89843	0.00221166	1.61027
17860596	8.3503e-05	1.37288	6.15588e-08	1.62497
17883522	8.62599e-05	-3.16849	7.33525e-06	-3.91475
17601803	8.66001e-05	-2.02847
17876063	8.67007e-05	-1.55636	2.14925e-07	-1.89376
17756335	8.69065e-05	-2.23162
17850799	8.70903e-05	-1.64045	0.000583547	-1.52562
17741458	8.75198e-05	1.38775
17883159	8.92798e-05	-1.23915
17725756	9.05061e-05	-1.72165
17784312	9.0761e-05	1.63688	2.41886e-06	1.86968
17822218	9.18907e-05	1.96548	0.000532456	1.79304
17748628	9.25249e-05	-2.47101	0.000208142	-2.33606
17829943	9.26299e-05	1.85174	9.6384e-06	2.05566
17754686	9.28873e-05	-1.47261
17883554	9.3517e-05	-1.88085	2.21312e-09	-3.11452
17869541	9.36632e-05	-1.85904
17819187	9.4338e-05	1.72372	7.21523e-05	1.74294
17602101	9.63899e-05	-1.70319
17815524	9.76746e-05	1.5222	0.00228157	1.3702
17602919	9.7789e-05	2.20386
17826275	9.91663e-05	-3.40479
17867310	9.92005e-05	-1.21066	1.01031e-05	-1.25117
17824961	9.93117e-05	1.25671
17867292	9.93265e-05	-1.16615
17632931	0.000100789	3.68944
17817442	0.000102096	2.41872
17823014	0.000102987	1.40838
17654394	0.000104346	-1.72357	2.45283e-05	-1.83005
17822828	0.000104554	-1.51336	3.41521e-07	-1.80823
17707107	0.000106904	-1.65282	5.30872e-06	-1.85262
17881016	0.000108636	-1.4566	0.00253595	-1.3243
17631196	0.000109311	1.2434	3.78985e-10	1.53271
17843860	0.000110227	1.88574	2.56247e-10	3.54049
17622159	0.00011261	-1.56346
17729561	0.000114743	1.37123	4.9423e-05	1.39961
17718992	0.000115231	1.81523	9.3116e-06	2.0353
17718862	0.000115442	1.45044	7.21245e-06	1.56903
17638192	0.000116425	1.65612
17727707	0.000120753	-1.78505	8.81603e-06	-2.00486
17818393	0.000123566	-1.90408
17831496	0.000124108	-1.47603
17784306	0.00012434	-1.5285
17727809	0.000125633	-1.36926	4.5515e-05	-1.40358
17849158	0.000128746	1.6043	2.82541e-05	1.69594
17861009	0.000128799	-2.27821
17883544	0.000129025	-3.2186	2.71592e-05	-3.70653
17880882	0.000131433	-1.48349
17715755	0.000131693	-1.69342	1.15689e-10	-3.00154
17721905	0.000131979	2.03259	0.000898437	1.82193
17850030	0.000136005	1.88319
17702608	0.000137157	-1.50843
17754649	0.000138987	-1.84899	3.28868e-05	-1.98142
17725746	0.000139266	1.51398	0.0016684	1.39194
17799771	0.000139654	-2.14706	2.79903e-06	-2.70392
17781910	0.000139659	-1.96547
17872600	0.00013988	1.51851	0.000584116	1.44737
17739279	0.000140535	1.2225
17631727	0.000140626	-1.55525	0.000981985	-1.45081
17604957	0.000142577	1.69417
17789627	0.000143196	1.80886	5.79123e-06	2.09627
17754774	0.000143598	-1.91149	0.0020128	-1.66104
17839036	0.000143726	1.46934	5.83976e-08	1.85215
17792789	0.000145081	-1.45044
17860779	0.000145214	-2.20287	5.21124e-10	-4.76961
17721670	0.00014635	1.96116	0.000699844	1.80088
17882885	0.00014635	1.96116	0.000699844	1.80088
17870294	0.000146671	2.75624	4.20735e-09	6.27201
17858443	0.000146751	1.56926	0.000228894	1.54438
17838939	0.000147206	1.46007	9.47757e-07	1.69239
17824442	0.000147754	-1.56306
17784202	0.000148694	1.8698
17620602	0.000149731	-1.60653	0.000205447	-1.58741
17764383	0.000149989	-1.78818
17739166	0.000150368	-1.68293
17626554	0.000151531	1.387	2.88609e-06	1.53399
17659048	0.000152059	1.8975	0.000346708	1.81861
17741001	0.000153541	1.51789
17663169	0.000155694	-1.72771
17755483	0.000155825	1.63679
17603089	0.000156076	2.27804
17809053	0.000156349	-1.41367	0.000661428	-1.35742
17801539	0.000156672	-1.87649	6.85467e-05	-1.95559
17638440	0.000160476	-1.55592	0.00074929	-1.47174
17742696	0.000163295	1.51956
17604069	0.000164028	-2.12567
17834828	0.000167038	1.5407
17800675	0.000167789	1.51036	0.00119419	1.41274
17674965	0.000168518	-2.95875
17805575	0.00016934	2.16679
17616479	0.000173717	1.50247	0.00108369	1.41264
17883534	0.000174484	-1.78445	3.97675e-07	-2.35176
17617206	0.000174591	-1.39855
17873597	0.000178926	-1.52515
17800390	0.000181069	-1.86865	6.19558e-05	-1.97205
17673389	0.000183382	1.52059
17818901	0.00018359	-1.62145	0.000595354	-1.54722
17861308	0.000183953	1.91212
17686506	0.000185987	1.49698
17703439	0.00018777	-2.12206
17852984	0.000188182	2.55867
17659339	0.000189928	1.48317
17802604	0.000190348	1.55359	0.00141313	1.44277
17846674	0.000193184	1.37995
17606551	0.000194359	-2.6462
17600283	0.000194952	3.14965
17879356	0.000196644	-1.46198	0.00307902	-1.3374
17789082	0.000197525	-3.56963
17767374	0.00020064	-1.40605
17882905	0.000201236	2.33468
17818405	0.000202171	-1.75607
17722779	0.000202367	-1.27421
17666190	0.000202965	-1.54788
17793809	0.000203083	1.43778	0.000415439	1.40718
17882823	0.00020438	-3.10793
17632231	0.000205296	1.55766
17834517	0.000205464	1.71994
17801262	0.000207264	-1.7812	1.50084e-07	-2.48188
17614449	0.000207273	1.3419
17846140	0.000208178	-2.45519	4.65732e-05	-2.73839
17819879	0.000208692	-1.36795	0.00346512	-1.26828
17610460	0.00020942	-2.47232	2.74382e-05	-2.86905
17882361	0.000211119	-1.52867
17833909	0.00021231	-1.48212
17845264	0.000213152	1.57353	6.34325e-06	1.78845
17811534	0.000213609	-1.92885	9.52242e-06	-2.27385
17676850	0.000217143	1.477
17608571	0.000221968	-2.04844
17880981	0.000222003	-1.29467	0.00304479	-1.22133
17850814	0.000224785	-1.91994
17823586	0.000228698	-1.63132	0.00297887	-1.46344
17707450	0.000230198	-3.22665
17606315	0.000231852	1.64419
17850830	0.000233074	1.69029
17761738	0.000234808	1.79875	4.83845e-05	1.94105
17881243	0.000238158	-1.38149	0.000187614	-1.39039
17848555	0.00024108	-1.51551	8.63811e-05	-1.56996
17882359	0.000242774	1.53389
17835838	0.000243132	-2.15296
17803020	0.000244154	-1.39786
17716119	0.000246071	1.86106	0.000142955	1.91409
17803874	0.000246087	-1.73525
17825105	0.000246773	1.82033
17712911	0.00024981	-1.72037
17655484	0.000256313	-1.55281	2.11982e-06	-1.84366
17734560	0.000256387	-1.94325
17639517	0.000262043	1.56694	4.53865e-06	1.81858
17746528	0.000264295	1.91751
17783571	0.000264704	1.85206
17724158	0.000265056	1.31022	5.53856e-05	1.35711
17811811	0.00026734	-1.60215	0.000125676	-1.65066
17676427	0.000267854	-1.75219
17694863	0.000267922	-1.57369	0.000774442	-1.51005
17651484	0.000268424	1.65307	4.15977e-06	1.96247
17607145	0.000269825	-2.20388
17836568	0.00027114	1.34915
17883215	0.000273257	-1.38477	0.00312209	-1.29136
17881259	0.00027442	-1.39071	0.000805106	-1.34888
17796946	0.000274836	-2.07585	1.13161e-06	-2.88131
17668394	0.000276851	1.57172
17602485	0.000277118	2.23074
17605713	0.000277153	2.22938	0.00295205	1.88634
17719497	0.000278191	1.39753
17840371	0.000279325	-1.34938	9.00744e-05	-1.38833
17881191	0.000281232	-1.31443
17749807	0.000281308	1.87767
17842271	0.000283051	1.37254
17689860	0.000284869	-2.00216
17707924	0.000286946	1.73836
17881091	0.000289435	-1.38304
17795420	0.000291534	1.45577	0.000871878	1.4048
17866741	0.000291996	1.27736
17804588	0.000295481	1.36057	0.002919	1.27812
17862724	0.00029926	1.96077
17832707	0.000300337	-1.43641
17816552	0.000301463	-1.62307
17668828	0.000304246	-2.90539	0.00247724	-2.38299
17601159	0.000306627	-1.77952
17601493	0.000306627	-1.77952
17757993	0.000307778	-1.2475	0.000720011	-1.2273
17794750	0.000308171	1.45518
17606087	0.000313162	2.14657
17746020	0.000318162	1.20797
17845428	0.000318276	1.66853
17660076	0.000323614	1.46785
17819642	0.000324242	-1.43383	0.000384329	-1.42624
17883151	0.000324312	-1.16584	0.0023133	-1.13495
17754056	0.0003269	1.26266
17830117	0.00032858	1.33785	0.00156825	1.28503
17814945	0.000329868	1.46217	8.15918e-06	1.6449
17781335	0.000330611	-1.33596
17789755	0.000331191	-1.43909	0.000305378	-1.44277
17600423	0.000332976	2.00077
17664422	0.000333792	1.46056
17763015	0.000334115	-1.52648	4.48547e-06	-1.77793
17718317	0.00033483	1.55399	1.0946e-05	1.76393
17716236	0.000337941	-1.78323
17787128	0.000338106	-1.61985
17730659	0.000338877	-2.06363	0.000137332	-2.18289
17792274	0.000339025	1.49285	0.00108474	1.43269
17735265	0.000343754	-1.31118	0.000648565	-1.29155
17859773	0.000346349	1.42972
17644363	0.000349077	1.47873
17731327	0.000350027	1.62748
17717687	0.000350665	1.59984	5.42681e-05	1.72421
17725783	0.000351054	-1.29133
17715499	0.000355772	1.21093
17883692	0.000356431	-1.33317
17882651	0.000357418	-1.71114	2.2976e-05	-1.9395
17612088	0.000357601	-1.97489	2.03093e-05	-2.33087
17672229	0.000358428	1.6075
17789912	0.000359903	1.8343	0.000104428	1.95682
17658217	0.000360216	1.58974
17801684	0.000360766	-1.70719	0.000830609	-1.64115
17640908	0.000362635	2.23952
17782592	0.000362989	1.61939
17700388	0.000363286	1.30711
17683352	0.000365385	-1.32659
17738677	0.000365393	-1.2639
17853605	0.000371091	-1.35673
17657599	0.000371172	1.79685	0.00209542	1.63984
17690182	0.000371801	-3.09402	1.08103e-05	-4.34341
17635431	0.00037303	1.59729
17600175	0.000373666	-1.84639
17659402	0.000374617	1.69121
17679264	0.000378804	1.35375	4.62205e-07	1.60586
17662710	0.000379417	-1.51801	1.47255e-05	-1.70397
17800550	0.00038185	1.47269
17635513	0.000381904	1.20848
17662513	0.000382675	-2.34102	0.000743606	-2.22641
17842138	0.000383229	2.0511	0.00111547	1.91504
17715470	0.000387042	1.37224
17755786	0.000389736	1.35055
17833282	0.000390209	-1.93768
17825960	0.000390279	1.37385
17601651	0.000396066	-2.20569
17624366	0.000396689	1.28407	0.0017927	1.24098
17838408	0.000397317	-1.44688
17822690	0.000401368	1.50431
17684462	0.000402444	-2.39008
17798630	0.000402499	-1.35227
17882477	0.000403564	1.8412	0.000154143	1.9383
17748801	0.000404018	-1.97717	1.42855e-09	-4.08854
17643794	0.000407738	1.48722	1.12188e-05	1.68048
17744974	0.000409205	-1.64939	0.000142536	-1.72737
17607929	0.000409372	-2.44393
17602203	0.000410194	2.17476	9.88651e-05	2.39488
17609327	0.000413822	2.27926
17685200	0.00041419	-1.73657	0.000128153	-1.83783
17602545	0.000416065	1.68672	1.93769e-08	2.62337
17774814	0.000416649	1.21292	0.000108004	1.24087
17769169	0.000420803	1.70056
17883205	0.000422845	-1.21813	0.000353937	-1.22193
17808851	0.000425794	1.55679	6.07498e-05	1.67821
17691431	0.000429088	1.51849
17737336	0.000431922	-1.61216	1.50933e-06	-2.0303
17815749	0.000432598	-1.25047
17853660	0.000432806	2.03721	0.00104737	1.92455
17701205	0.000434289	-2.38002
17609267	0.000434467	1.70781
17707897	0.000434612	-1.43201
17781619	0.000436604	-1.32306	5.5266e-06	-1.46967
17735993	0.000438725	-2.39067	3.51643e-08	-4.81158
17810550	0.000441268	1.47787
17717060	0.000441992	1.51262	0.000106453	1.59305
17690859	0.000442006	-1.85362
17850063	0.000442681	1.65434
17609987	0.000443482	-2.56515
17623563	0.00044543	1.71681	0.00027406	1.75738
17722532	0.000446425	2.17811	1.80642e-09	4.9844
17873704	0.000447236	-1.4758
17846180	0.000447446	-1.28867
17768732	0.000449033	-1.38837
17681607	0.000456564	2.00782	0.000506042	1.99491
17726227	0.000463875	1.37711
17722864	0.000467108	-1.82314	0.000264261	-1.87974
17681825	0.000467926	1.80326	0.000217426	1.8774
17815145	0.000468943	1.53116	0.000114148	1.61498
17883542	0.000470518	-1.95765	0.000980338	-1.8716
17832006	0.000471734	1.42235	2.51793e-08	1.91426
17679534	0.000473363	-1.74796
17640224	0.000476029	-1.85373	0.000344199	-1.88737
17755968	0.000476832	1.6643
17882707	0.000477245	1.29929	0.00036776	1.30729
17834539	0.000477695	-1.55985
17857412	0.000482204	1.4568
17778487	0.000485428	1.49309
17882003	0.000486895	-1.38775	0.000323376	-1.4046
17735842	0.000491593	-1.4149	0.000117162	-1.47898
17717774	0.000492868	1.3945	0.000321978	1.4124
17764625	0.000494199	1.38594
17813288	0.000494452	-1.43979
17779174	0.000496011	-1.94077
17711387	0.000498371	1.53297
17631751	0.000500348	-1.37334
17769576	0.000504273	1.82501
17880837	0.000506441	1.42212
17623905	0.000508426	-1.25692
17665620	0.000508706	-1.81245
17836692	0.000513605	1.65833	0.000126937	1.76662
17601921	0.00051872	1.76752
17739545	0.000519777	1.48436	0.00198213	1.41291
17607907	0.000521546	1.99829
17607183	0.000522194	1.90686
17761828	0.000522624	-1.5414	0.00299037	-1.43566
17613001	0.000522922	-1.44746	0.000759638	-1.42922
17615108	0.000524987	1.38413	1.81361e-07	1.73237
17694051	0.000527286	1.52438	1.38588e-05	1.74477
17861070	0.000536252	1.46235
17696209	0.00053914	-1.41611
17777184	0.00054035	1.55037
17854251	0.00054243	1.78668	0.00158763	1.68569
17712920	0.000544683	-1.49601
17618749	0.00054607	1.69657	0.00017618	1.7908
17641623	0.00055167	1.4095
17601601	0.0005536	-1.79523
17867302	0.000554541	-1.09835	7.14446e-06	-1.13858
17603683	0.00055551	-1.95826
17741512	0.000556033	-1.88816
17660092	0.000562663	1.53222
17722579	0.000562709	1.38953
17608093	0.000563848	2.54127
17791773	0.000565374	1.25237
17710887	0.00056549	-1.61939	8.78563e-05	-1.75568
17608117	0.000567827	2.11377
17812941	0.000571639	1.39509	7.48837e-05	1.48269
17729123	0.000572667	-1.37959
17764013	0.000574481	-1.72767
17656316	0.000575592	1.39922
17817747	0.000584476	1.33799
17649394	0.000584705	-1.41195
17766506	0.000585621	1.2821
17881313	0.000590639	-1.30941	2.95054e-07	-1.56717
17602015	0.000591189	1.43967
17649544	0.00059203	1.66563
17724546	0.000592397	1.38197
17755549	0.000596051	-1.54009
17861074	0.000596997	1.36502	2.48876e-07	1.68825
17792908	0.000598048	-2.02431	0.000285388	-2.12365
17632544	0.000599278	1.39915	0.000482612	1.40859
17777215	0.000602002	1.35686
17856203	0.000604238	1.66504
17737611	0.000604948	-1.30569	0.000431887	-1.31658
17680410	0.000606861	1.57231	0.000213186	1.64201
17869980	0.000608308	1.80283
17789768	0.000609741	-1.25317
17630651	0.000609958	-1.34874
17718087	0.000610441	1.3582
17674562	0.000611736	-1.46844
17764019	0.000612155	1.96884
17674975	0.000613131	-1.25853	5.14934e-06	-1.38766
17766877	0.00061503	1.84425	0.00174114	1.73618
17793891	0.000616225	-1.64151
17637186	0.000617251	1.7393	1.03004e-05	2.12922
17689393	0.000625033	-1.50395	0.000464301	-1.52099
17654306	0.000626044	1.56628	8.40654e-05	1.70003
17877133	0.000627902	-2.12074
17706592	0.000630611	1.27883
17606549	0.000635742	-1.58124
17768104	0.000635871	1.48622	1.15747e-05	1.71346
17696709	0.00063856	-1.42002
17749082	0.000639659	-1.56981
17842119	0.000639922	1.46349
17602853	0.000645263	2.05724	0.00211289	1.89553
17662657	0.000647483	-1.31646
17717103	0.00064766	3.01894	3.52478e-05	4.03961
17707219	0.000650422	1.69614
17855571	0.000651979	1.23393	0.00111542	1.22082
17613759	0.000654348	-1.60409	0.00105603	-1.57014
17604795	0.000656815	-1.68997
17842307	0.000658222	1.36932	9.72983e-05	1.44679
17826260	0.000662222	-1.90639
17802937	0.000662499	1.63203	2.38177e-05	1.89119
17634984	0.00066559	-1.48691
17880829	0.000665745	1.21184
17817021	0.000666677	-1.86811	0.00070375	-1.86217
17810930	0.000667878	-1.8029
17695893	0.000669242	-1.36506
17718463	0.000669321	-1.60062
17729688	0.000670991	-1.47173
17608045	0.000675569	-1.94924
17655769	0.000678678	-1.28706	1.00805e-06	-1.49026
17655771	0.000678678	-1.28706	1.00805e-06	-1.49026
17792446	0.000678826	1.27089
17708151	0.000679813	1.60347
17699137	0.000682742	1.2333
17732896	0.000683466	1.33417
17619078	0.000685524	1.50662
17834057	0.000685728	1.26888	4.63324e-06	1.41209
17637795	0.00068892	1.62946
17680223	0.000689729	1.3188
17768299	0.000696443	-1.43694
17843083	0.000701706	1.32031
17829894	0.000702821	-1.32071
17699647	0.000709262	-1.86972
17824012	0.00070998	-1.48645	0.000664834	-1.49012
17729603	0.000713987	-1.42739	0.00232108	-1.3705
17755341	0.000717244	1.66898
17820393	0.000720793	1.53671
17668900	0.000720973	1.6879
17614715	0.000721121	1.35149	5.18041e-05	1.45369
17850784	0.000722329	-1.86812	0.00348584	-1.69655
17728877	0.000725289	-1.88887
17846653	0.000727004	1.72179
17780315	0.000728252	1.59843	0.00226108	1.51803
17727439	0.00073587	-1.42013
17631771	0.000743237	-1.27235
17706613	0.000743749	1.40754
17793730	0.000744124	-2.12736
17799716	0.000744569	1.84035
17601135	0.000746549	1.84398
17601469	0.000746549	1.84398
17792262	0.000746555	1.45798
17600107	0.000746878	2.11053
17601139	0.000751667	1.97248	0.000139024	2.19511
17601473	0.000751667	1.97248	0.000139024	2.19511
17757365	0.000752146	-1.5723
17635559	0.000757742	1.40565
17703706	0.000763938	-1.75547	8.24307e-06	-2.21474
17608675	0.00076425	2.1945
17604489	0.000766455	1.71538	0.00109539	1.68383
17881963	0.000767027	-1.35456
17698748	0.000767825	1.45049	0.000192188	1.52234
17790664	0.000771089	-1.62807
17615650	0.000771727	-3.14633	0.00119045	-2.99896
17882631	0.000775619	-1.34823
17629100	0.000778169	1.26917
17641297	0.000778791	1.2741	5.64493e-07	1.49247
17812993	0.000779554	-1.59983
17883171	0.000783911	-1.32266
17832749	0.000785137	1.55882	1.31849e-06	2.01584
17883165	0.000786287	-1.25495	0.00107648	-1.24633
17602477	0.000787383	2.74727
17819367	0.000790089	1.59778
17639089	0.000796899	1.85989	0.00188095	1.76548
17604379	0.000808138	2.05833
17609791	0.000812924	1.7351
17717556	0.000818553	-1.2381	0.000616026	-1.24535
17824786	0.000819664	2.01778
17848000	0.000820694	1.35764
17763312	0.00082288	1.52162
17836743	0.000826373	-1.41577
17676506	0.000829188	1.92689
17778845	0.000829901	1.50599
17603793	0.000830441	2.04563	0.000323249	2.18167
17632292	0.00083227	-1.55818
17854672	0.000836418	1.20678
17631493	0.0008368	1.70419	0.000477497	1.75381
17665859	0.000837376	1.31577
17601927	0.000842853	-1.91316
17716731	0.000843165	-1.66881	1.10165e-05	-2.04872
17679252	0.000844027	-1.41774
17686658	0.00084869	1.22309	1.02688e-08	1.50478
17827725	0.000852614	-1.49605	0.000150955	-1.59817
17803056	0.000855287	1.34616
17817302	0.000856035	1.86479	9.15496e-08	3.13098
17770451	0.000856712	-1.32344
17601717	0.000861184	-2.07279	0.00251223	-1.91835
17830414	0.000862938	1.49085	0.000885614	1.48935
17774860	0.000867993	1.4767	0.000176294	1.56655
17698576	0.000869118	-1.73892
17702592	0.000871298	1.35072	0.00223295	1.31337
17739375	0.000873408	-1.32267
17653172	0.000878208	-1.425
17601747	0.00088037	1.33602	1.027e-05	1.50569
17776835	0.000901438	1.68523	0.000169714	1.83136
17872691	0.000906407	1.30732
17740089	0.000911109	1.51186
17697739	0.000917209	-2.06267
17755918	0.000917344	1.43042
17799707	0.000917802	2.02127
17641529	0.000919973	1.32825
17867280	0.000921518	-1.12429	1.84479e-05	-1.17354
17772365	0.000922008	-1.50236
17784717	0.000923627	-1.41247
17882745	0.000925278	1.41089	2.02684e-05	1.59591
17606601	0.000930529	2.45971
17607245	0.000930529	2.45971
17833751	0.00093112	1.36316	7.0936e-06	1.56898
17752825	0.000933788	-1.35645	0.00347798	-1.30268
17863000	0.000937762	1.30892
17769066	0.000944318	-1.5908
17778503	0.000954946	-1.67244
17742464	0.000956679	1.59207
17728638	0.000962856	2.21653	0.000230057	2.47418
17771740	0.000964747	1.44292
17650742	0.000969467	1.39616
17703248	0.000970792	-1.37679	0.00102333	-1.37449
17818417	0.000971908	-1.34782
17769627	0.000973675	-1.31387	6.79048e-06	-1.49141
17692374	0.000974249	1.24467	0.002707	1.21691
17616492	0.000974771	-1.4007
17832280	0.000981205	-1.36938
17603673	0.000982584	2.0002	0.000453284	2.10777
17663957	0.000983768	-1.36505
17762869	0.000992598	1.48863	0.000269881	1.56541
17600295	0.0009938	-2.02712
17649313	0.000994516	1.3572
17605381	0.000999365	1.59073
17774116	0.00100179	1.32488
17636276	0.00100396	-1.89453	0.000175888	-2.10966
17698136	0.00100494	-1.44903
17666795	0.00100609	1.55272	9.91751e-06	1.8799
17724949	0.00100643	1.435
17825003	0.00100873	1.33055
17638220	0.00100934	1.70522	0.000329483	1.80752
17739867	0.00100936	1.86811
17624391	0.00101405	-2.3479	1.72384e-05	-3.26174
17674527	0.00102519	1.37689
17848691	0.00102993	-1.57649
17813007	0.00103144	-1.43434
17715555	0.00103656	1.39079
17693260	0.00103853	-2.26288
17675200	0.00103892	-1.37426
17825265	0.00104492	1.43838
17785666	0.00104635	-1.37674
17824806	0.00104843	1.7544	0.00333343	1.6416
17659172	0.00105255	-1.31528
17636293	0.00105388	1.41644
17726231	0.00105551	1.45044
17763934	0.00106125	1.67986	0.000875767	1.69662
17714337	0.00106436	1.40183	0.000875921	1.41106
17722670	0.00106861	-1.36171
17727454	0.00106862	1.63549	0.000606491	1.68127
17600885	0.00106948	2.05444	3.28794e-09	4.81824
17619214	0.0010765	-2.02126	8.94205e-05	-2.3939
17850039	0.00108819	-1.81913
17867972	0.0010884	1.75192	0.000629812	1.80613
17701462	0.00108871	1.5053	0.0022602	1.46022
17883538	0.00109305	-1.73268
17795984	0.00109508	1.70814	0.000576707	1.76737
17862709	0.00109672	-1.55089
17636784	0.0011004	1.29635
17656772	0.0011005	-2.07469	0.00105337	-2.08135
17774168	0.00110175	7.35901	1.14892e-05	17.5025
17843187	0.0011019	1.8671
17603095	0.00110404	2.23109
17621590	0.00110785	-1.69695
17658543	0.00111236	-1.39597	0.0029873	-1.34953
17843113			6.48371e-11	-3.66605
17705599			6.90326e-11	3.8729
17614994			1.631e-10	2.4738
17809577			5.15763e-10	2.51195
17627369			1.77713e-09	3.25813
17844555			2.26233e-09	-11.403
17788437			2.58008e-09	-6.59664
17799775			3.64879e-09	1.6259
17881271			4.13995e-09	-1.97239
17725358			6.69818e-09	-2.93599
17822695			7.03722e-09	3.36983
17668004			2.44319e-08	-2.38391
17774126			3.21936e-08	1.56821
17757587			4.00927e-08	2.29871
17715083			4.13296e-08	3.35816
17861690			4.46542e-08	2.6018
17692310			5.0719e-08	-2.35225
17676720			5.34825e-08	1.67829
17688096			5.98841e-08	-3.78898
17787101			7.11569e-08	1.4684
17716254			7.2651e-08	-1.41301
17611785			7.83634e-08	-3.07272
17646017			9.63076e-08	3.05544
17859653			1.18974e-07	3.74303
17648954			1.25119e-07	3.05064
17870945			1.34385e-07	1.72569
17788137			1.42112e-07	-2.32974
17859270			2.06446e-07	-2.3281
17826282			2.15588e-07	-2.40344
17883546			2.50188e-07	-2.31338
17661380			2.50313e-07	-3.11205
17802718			3.0152e-07	-2.38807
17758909			3.20614e-07	2.43949
17615199			3.27562e-07	-1.78927
17798143			3.37508e-07	1.85965
17839835			3.38929e-07	2.21113
17613089			3.39899e-07	1.73614
17655243			3.60501e-07	2.05311
17824734			3.99684e-07	1.52559
17692360			4.04097e-07	-1.96778
17720497			4.30662e-07	-3.11583
17736956			4.34552e-07	1.61158
17767946			4.6538e-07	2.02243
17780805			4.81202e-07	1.53502
17650866			4.85218e-07	1.42195
17617669			5.23763e-07	-1.69494
17869946			5.43131e-07	1.80465
17605979			5.46508e-07	2.56968
17868451			5.75056e-07	9.97992
17677057			5.96389e-07	1.83758
17693483			6.32558e-07	1.46266
17665321			6.33032e-07	-1.52896
17838721			7.326e-07	1.4648
17718999			7.66563e-07	1.58387
17693043			8.22938e-07	1.26545
17621059			8.99981e-07	2.52636
17746419			9.06911e-07	2.80493
17768133			9.49919e-07	-1.94319
17810457			9.98316e-07	-2.05946
17723306			1.00401e-06	1.37611
17633521			1.14019e-06	3.02555
17634998			1.19077e-06	-2.31452
17650598			1.23695e-06	1.55302
17610371			1.25679e-06	1.81534
17786212			1.27767e-06	1.33273
17775066			1.2785e-06	-1.63626
17658961			1.28308e-06	-2.31889
17883061			1.29195e-06	3.11127
17612141			1.37908e-06	1.33635
17703644			1.45139e-06	1.59739
17642625			1.47788e-06	-1.77292
17642593			1.48385e-06	5.17932
17764604			1.49332e-06	1.82234
17628738			1.59229e-06	3.00113
17870243			1.59939e-06	3.17536
17760013			1.74082e-06	1.50919
17757931			1.8054e-06	-1.62191
17600635			1.83938e-06	2.67915
17610149			1.83938e-06	2.67915
17750426			2.07596e-06	-3.10833
17605401			2.1555e-06	3.007
17667391			2.2394e-06	-1.75103
17824456			2.24416e-06	-1.65151
17724007			2.3596e-06	1.70938
17718758			2.37632e-06	1.46067
17838725			2.39544e-06	1.55936
17801257			2.45422e-06	-1.85494
17667519			2.45701e-06	1.368
17645916			2.67333e-06	-1.53912
17703888			2.81153e-06	2.297
17676709			2.84052e-06	1.49042
17773182			2.86181e-06	-1.8079
17731315			2.8936e-06	1.93762
17868212			3.04006e-06	3.7167
17764385			3.08523e-06	-1.672
17755924			3.24346e-06	-1.98047
17686414			3.31262e-06	-2.60007
17776402			3.33583e-06	-3.57936
17786706			3.34791e-06	2.81608
17604133			3.38843e-06	3.92052
17880375			3.43008e-06	1.91239
17617664			3.47179e-06	2.20035
17740143			3.63074e-06	-2.11117
17744496			3.68596e-06	-4.33713
17756846			3.69401e-06	-1.48447
17634110			3.69826e-06	-1.43027
17851148			3.70143e-06	1.39249
17869956			3.8475e-06	5.71606
17745132			3.86965e-06	1.97007
17850782			3.89138e-06	1.50114
17607655			3.93449e-06	2.17526
17609073			3.93449e-06	2.17526
17734724			4.06158e-06	2.47883
17693069			4.10388e-06	-1.81902
17656387			4.21449e-06	2.75274
17868292			4.25057e-06	3.15143
17867336			4.35753e-06	4.79359
17801251			4.69042e-06	-1.39689
17868190			4.70854e-06	4.42435
17774256			4.72095e-06	1.4318
17636285			4.75306e-06	5.80358
17784049			4.81291e-06	-1.55615
17754749			4.8207e-06	-1.63356
17734091			4.8744e-06	2.1089
17643505			4.8861e-06	-1.46328
17868954			4.89213e-06	8.39039
17663271			4.9616e-06	-1.69061
17715856			5.01044e-06	-2.24137
17872104			5.02736e-06	-2.17624
17839744			5.08371e-06	2.01602
17617192			5.12564e-06	1.9685
17772095			5.16596e-06	1.34945
17728146			5.23235e-06	4.83074
17606649			5.23654e-06	-3.1379
17846131			5.48239e-06	-2.33345
17883197			5.49929e-06	4.72559
17609217			5.55519e-06	3.60947
17717598			5.72153e-06	1.77298
17780879			5.77037e-06	-1.46935
17881765			5.79662e-06	-1.71767
17851319			6.08582e-06	1.75099
17793498			6.16386e-06	-1.59704
17851373			6.32434e-06	1.61177
17862857			6.41871e-06	1.63156
17819529			6.53439e-06	-1.56929
17824809			6.54429e-06	2.43971
17780567			6.56279e-06	1.70501
17610400			6.58212e-06	1.97612
17867527			6.59358e-06	2.94274
17868331			6.75004e-06	3.23112
17758905			7.01555e-06	3.72605
17837591			7.03528e-06	-1.93166
17867695			7.04623e-06	4.23723
17883240			7.3921e-06	-2.2478
17681249			7.42306e-06	1.83376
17869659			7.59485e-06	3.17075
17736367			7.61248e-06	1.40714
17632466			7.70164e-06	-1.55998
17748808			8.16503e-06	-2.26681
17805286			8.222e-06	-1.50422
17648374			8.35173e-06	1.68017
17671379			8.60346e-06	10.1683
17820740			8.63814e-06	2.30949
17771744			9.07393e-06	1.50216
17870199			9.22759e-06	4.63972
17709842			9.37159e-06	-1.66209
17739169			9.38569e-06	-1.50801
17633519			9.60368e-06	3.64357
17616061			9.6567e-06	1.58768
17679281			1.00089e-05	-1.73071
17626698			1.0041e-05	1.52659
17827034			1.03028e-05	1.37803
17604061			1.03443e-05	3.43609
17663221			1.0607e-05	1.31364
17696863			1.06621e-05	3.59571
17667361			1.07082e-05	1.88765
17712099			1.08472e-05	-3.28898
17868201			1.08687e-05	2.52091
17614022			1.09707e-05	1.57793
17633497			1.10242e-05	2.03063
17755189			1.11974e-05	-1.91801
17688117			1.1234e-05	3.5588
17675429			1.12639e-05	8.57458
17662569			1.12847e-05	-1.54597
17635080			1.13181e-05	-1.48578
17733040			1.13961e-05	-2.85447
17734111			1.14198e-05	-1.80571
17867518			1.20406e-05	6.75374
17628764			1.22325e-05	2.56256
17866946			1.24851e-05	-1.68506
17767961			1.2678e-05	-2.27913
17728713			1.27226e-05	1.56168
17731948			1.3049e-05	1.94695
17710118			1.3069e-05	2.07684
17606357			1.34999e-05	-2.10128
17663568			1.38168e-05	1.50385
17700806			1.38251e-05	3.17855
17808687			1.3852e-05	-1.58538
17857463			1.39334e-05	1.6547
17612223			1.39561e-05	2.16475
17668101			1.4248e-05	1.51202
17798238			1.42487e-05	-1.83567
17750127			1.42975e-05	-1.59943
17645647			1.46063e-05	1.74117
17869413			1.49592e-05	1.80803
17869004			1.49741e-05	3.41071
17636536			1.50249e-05	-1.7752
17614474			1.54489e-05	1.64679
17800209			1.54964e-05	1.46668
17640252			1.58382e-05	1.94078
17616659			1.61873e-05	-1.46635
17776553			1.62839e-05	-1.79304
17641362			1.63576e-05	2.00278
17672113			1.68801e-05	1.8125
17847506			1.69668e-05	1.5696
17820466			1.73208e-05	-1.4488
17654595			1.78064e-05	1.6338
17774045			1.82437e-05	-1.57729
17728726			1.8503e-05	-1.59955
17698625			1.87136e-05	1.33745
17860300			1.87189e-05	4.75262
17752109			1.9018e-05	-3.04266
17882017			1.93535e-05	1.98262
17642410			1.94479e-05	1.44855
17616047			1.95534e-05	-1.642
17824258			1.96152e-05	-1.40998
17716029			1.98688e-05	-2.2834
17758767			2.03765e-05	2.2027
17631477			2.0453e-05	2.52031
17869614			2.06034e-05	2.27478
17715244			2.09136e-05	1.50291
17639889			2.11238e-05	-1.70957
17613662			2.12288e-05	-1.56203
17784133			2.14643e-05	1.63219
17642379			2.18597e-05	-2.09057
17869491			2.19576e-05	2.82084
17881873			2.20126e-05	-1.58822
17867294			2.20704e-05	-1.15342
17617196			2.22306e-05	7.3298
17617198			2.22306e-05	7.3298
17633479			2.22306e-05	7.3298
17633499			2.22306e-05	7.3298
17633503			2.22306e-05	7.3298
17633505			2.22306e-05	7.3298
17633509			2.22306e-05	7.3298
17633511			2.22306e-05	7.3298
17633515			2.22306e-05	7.3298
17633523			2.22306e-05	7.3298
17798263			2.22669e-05	1.95656
17787103			2.25952e-05	1.89333
17666026			2.28542e-05	1.38562
17847048			2.29322e-05	-1.69867
17822363			2.31453e-05	-2.29568
17623058			2.33757e-05	1.53537
17718055			2.34198e-05	1.90213
17754014			2.34263e-05	1.58413
17702605			2.35587e-05	1.687
17628697			2.37881e-05	4.76223
17870290			2.38508e-05	4.51811
17603335			2.39955e-05	3.18632
17868088			2.41911e-05	2.57858
17812079			2.43992e-05	1.9209
17643262			2.44535e-05	2.84731
17733519			2.46917e-05	1.83658
17869026			2.51776e-05	2.663
17650310			2.54007e-05	1.51928
17633507			2.59551e-05	5.77454
17826519			2.60932e-05	1.91147
17705992			2.61008e-05	1.7484
17875765			2.61285e-05	2.15619
17775569			2.61542e-05	2.1261
17833806			2.62849e-05	1.40902
17853763			2.69359e-05	-1.68055
17711255			2.70902e-05	1.40257
17720672			2.74878e-05	2.25147
17882873			2.74878e-05	2.25147
17799921			2.75138e-05	-1.93762
17815441			2.80806e-05	-1.65831
17657767			2.81944e-05	1.81765
17774340			2.85549e-05	1.41465
17605889			2.85581e-05	2.20622
17780561			2.88457e-05	1.64495
17660981			2.89333e-05	1.96067
17881695			2.90285e-05	2.36998
17882081			2.90399e-05	1.49081
17768828			2.91234e-05	1.86587
17868022			2.92108e-05	5.97298
17831371			2.93946e-05	1.46341
17750880			2.97333e-05	1.26841
17867356			3.02503e-05	1.38849
17839813			3.04144e-05	-1.86402
17669073			3.05758e-05	2.2586
17788948			3.07247e-05	1.91499
17847132			3.09342e-05	1.38647
17854004			3.12055e-05	-1.70143
17646314			3.16092e-05	-1.69073
17711454			3.17361e-05	2.76657
17828362			3.17677e-05	-1.53944
17759167			3.19176e-05	-2.18147
17775297			3.22573e-05	-2.13122
17882987			3.3139e-05	1.2185
17656161			3.33303e-05	-2.60917
17610368			3.39003e-05	1.64425
17798817			3.39257e-05	1.82475
17859113			3.40085e-05	-1.57014
17868803			3.40229e-05	2.15518
17870142			3.40229e-05	2.15518
17799482			3.41397e-05	2.19416
17635987			3.42553e-05	1.36006
17865436			3.47878e-05	1.42829
17671383			3.50417e-05	8.59965
17831465			3.56505e-05	-1.44523
17672900			3.56618e-05	2.14389
17784198			3.59258e-05	-2.35089
17802894			3.63327e-05	-1.86633
17700900			3.6442e-05	-1.67983
17633487			3.68835e-05	7.32193
17761617			3.70723e-05	-1.58802
17658595			3.72472e-05	1.58557
17871032			3.72932e-05	-2.541
17873566			3.7666e-05	-1.41558
17683610			3.84868e-05	-1.45535
17822159			3.8585e-05	-1.54248
17667730			3.86796e-05	1.26269
17792573			3.87028e-05	-1.82439
17833686			3.88288e-05	-1.82159
17633467			4.00132e-05	3.79835
17677389			4.00658e-05	-2.84991
17633481			4.01098e-05	5.04999
17697582			4.02855e-05	-1.23479
17684237			4.063e-05	1.48719
17868159			4.07359e-05	2.13808
17633483			4.18953e-05	7.15061
17633485			4.18953e-05	7.15061
17633491			4.2125e-05	6.95753
17633493			4.2125e-05	6.95753
17629894			4.27867e-05	-1.43257
17868182			4.28378e-05	3.79417
17649763			4.32758e-05	-1.89252
17714328			4.35391e-05	-1.57159
17881959			4.49604e-05	-1.68242
17796683			4.61606e-05	1.49522
17814321			4.65336e-05	2.4036
17883155			4.67664e-05	-1.14917
17681317			4.71514e-05	-2.62331
17789643			4.72729e-05	-1.76318
17624116			4.73556e-05	1.60564
17821987			4.83043e-05	2.47358
17731869			4.85393e-05	2.09577
17869610			4.85393e-05	2.09577
17666944			4.85821e-05	-1.45873
17818007			4.86245e-05	-1.55882
17702603			4.87805e-05	1.59757
17613388			4.89782e-05	1.43454
17670759			4.92919e-05	1.35923
17754085			5.00621e-05	-1.83242
17812757			5.00883e-05	-1.78819
17650401			5.02304e-05	-1.80799
17830831			5.04051e-05	1.43966
17835248			5.07327e-05	7.31316
17682516			5.12294e-05	-1.55338
17607375			5.16052e-05	1.86879
17869583			5.22045e-05	5.34453
17715898			5.25174e-05	1.46503
17615226			5.25506e-05	1.44489
17836379			5.2739e-05	1.46093
17869635			5.27781e-05	1.859
17805548			5.34066e-05	-1.45974
17736300			5.36213e-05	-1.86216
17808222			5.37183e-05	1.66598
17842857			5.37528e-05	-1.81062
17636654			5.40621e-05	-1.54511
17600257			5.42682e-05	2.71184
17850024			5.48548e-05	1.26043
17824097			5.49375e-05	-1.89882
17764606			5.52078e-05	1.47988
17869664			5.56707e-05	1.55077
17769544			5.57033e-05	1.81278
17882735			5.58599e-05	-4.27863
17874787			5.6104e-05	1.87083
17636049			5.64509e-05	-1.37279
17869622			5.68213e-05	5.77145
17820001			5.68546e-05	-1.3044
17713271			5.72997e-05	-1.45194
17856436			5.78743e-05	-1.53593
17735063			5.79341e-05	-1.21916
17869563			5.89302e-05	3.40001
17845542			5.91639e-05	-1.52532
17696592			5.96929e-05	-1.72475
17879641			5.98066e-05	-1.32366
17628650			5.99505e-05	-1.53906
17838332			5.99714e-05	1.49623
17732726			6.0027e-05	-2.00369
17629882			6.05351e-05	1.57232
17702606			6.06681e-05	1.66252
17883536			6.07469e-05	-3.51072
17747780			6.09766e-05	-1.32883
17687175			6.23782e-05	-1.68884
17646776			6.28109e-05	-1.53894
17705657			6.32692e-05	1.97685
17833233			6.37287e-05	1.29386
17674659			6.47678e-05	1.77635
17600745			6.4896e-05	1.96557
17619000			6.49654e-05	1.5892
17631158			6.51071e-05	1.64065
17798913			6.5257e-05	1.31818
17868172			6.58805e-05	2.95775
17702467			6.5892e-05	-1.75493
17867524			6.61406e-05	1.76786
17737160			6.63178e-05	-1.86294
17645328			6.65786e-05	1.43815
17882895			6.74813e-05	-3.01284
17824776			6.7603e-05	2.00126
17868307			6.78696e-05	5.18529
17880774			6.81158e-05	1.56179
17724153			6.88379e-05	-1.52413
17675009			6.91119e-05	2.06779
17817492			6.97536e-05	1.53163
17737691			7.02391e-05	-1.94396
17737506			7.03753e-05	-1.57222
17656469			7.04102e-05	1.87727
17631591			7.07751e-05	1.31814
17763568			7.1004e-05	1.5118
17681666			7.1191e-05	1.89623
17700223			7.13393e-05	2.57126
17732286			7.18142e-05	2.05679
17666969			7.22006e-05	-1.7335
17635099			7.2471e-05	-3.57286
17868233			7.25751e-05	3.91967
17869440			7.38839e-05	6.25271
17820653			7.42624e-05	1.41
17758510			7.45082e-05	-1.58986
17839750			7.5136e-05	1.44788
17761716			7.54545e-05	1.56057
17819342			7.56887e-05	1.71752
17632277			7.6066e-05	1.57233
17644306			7.61968e-05	1.53963
17719470			7.62425e-05	-1.72233
17742399			7.62915e-05	-1.65968
17766335			7.65931e-05	1.52816
17639262			7.68114e-05	-1.57214
17812297			7.69756e-05	1.60134
17875672			7.72283e-05	1.55681
17650849			7.76554e-05	-1.48191
17716694			7.8375e-05	-1.64867
17824784			7.83888e-05	2.41901
17697802			7.88998e-05	1.8435
17782247			7.89863e-05	-1.34403
17881839			7.904e-05	-1.27894
17700416			7.95376e-05	1.39776
17717611			8.02792e-05	-1.69461
17869436			8.05045e-05	2.04583
17813889			8.08313e-05	-1.65549
17750926			8.17892e-05	-1.47817
17663050			8.22803e-05	1.7769
17844169			8.25948e-05	-1.50035
17634709			8.31738e-05	-1.39505
17655123			8.41886e-05	1.71548
17881995			8.43799e-05	-1.65676
17682446			8.50425e-05	1.52348
17880776			8.53205e-05	-1.42646
17883207			8.58949e-05	7.08946
17739677			8.59262e-05	1.38112
17717736			8.60189e-05	-1.55515
17832363			8.70696e-05	2.87509
17689038			8.76212e-05	-2.18138
17877127			8.83573e-05	-1.82611
17675730			8.85067e-05	3.3102
17853556			8.8539e-05	-1.37211
17690470			9.00598e-05	-1.4885
17758890			9.01056e-05	4.36071
17883228			9.02592e-05	-1.74599
17632887			9.03892e-05	1.3947
17696849			9.09453e-05	3.33874
17741245			9.20979e-05	1.64571
17737735			9.21454e-05	1.47408
17881947			9.29656e-05	1.41288
17691162			9.29704e-05	-1.58349
17739447			9.38728e-05	1.54883
17630338			9.4782e-05	1.72487
17798988			9.55349e-05	-1.57985
17882627			9.6223e-05	1.32998
17818571			9.76705e-05	2.88398
17708291			9.77376e-05	-2.12229
17666909			9.84868e-05	1.35389
17757696			9.88639e-05	-2.17507
17678273			9.91568e-05	4.24089
17791714			9.91799e-05	1.86646
17821903			9.92779e-05	-1.32153
17870343			9.94751e-05	2.3785
17838973			0.000100121	-1.33826
17856676			0.000101721	1.99557
17692632			0.00010243	-1.68073
17766817			0.000102604	1.80037
17841480			0.00010375	-2.275
17813463			0.000104519	2.19287
17868091			0.000104623	2.78532
17620763			0.000106282	1.49322
17774354			0.000106381	1.24171
17618601			0.000106454	1.84391
17823482			0.00010697	2.84347
17810055			0.000107984	1.98861
17833739			0.000108078	1.38964
17832399			0.000108493	-1.28393
17832400			0.000108493	-1.28393
17603675			0.000109036	3.38274
17719074			0.000109204	-1.73766
17719079			0.000109204	-1.73766
17672910			0.000109855	1.90511
17808548			0.000110335	-1.69923
17868901			0.000110408	3.74483
17787110			0.000110525	1.6075
17830544			0.000110963	1.29076
17804693			0.000111028	-1.56979
17881124			0.000111538	-1.55066
17745308			0.000111865	-1.52595
17612204			0.000112368	1.88195
17714036			0.0001125	-1.99842
17610017			0.000113409	3.19942
17691275			0.000114264	1.5857
17692439			0.000114537	1.45797
17628743			0.000114921	3.11031
17607921			0.000115157	-2.37945
17868246			0.000115401	1.68575
17868281			0.000116252	2.75592
17728152			0.000116984	6.11154
17672512			0.000117039	1.42375
17869398			0.000118324	3.45128
17666249			0.000118586	-1.74581
17764796			0.000122009	1.59881
17868081			0.000122043	3.08357
17633599			0.000122322	4.68506
17688114			0.000123759	2.48042
17851230			0.00012397	1.8414
17714900			0.000124253	1.65712
17758902			0.000126355	3.32397
17803496			0.0001267	2.04028
17784153			0.000127653	1.22055
17714162			0.000129673	1.42257
17869704			0.000129674	-1.54483
17812755			0.000131033	1.27204
17867521			0.000131161	2.1015
17669104			0.000132474	-1.93772
17664523			0.000132682	1.98623
17669111			0.000134468	1.54998
17822507			0.000136056	-2.71878
17710636			0.000136425	1.38309
17606941			0.000136571	2.42926
17817441			0.000136581	2.00482
17812315			0.00013694	1.89093
17696513			0.000137473	-1.76239
17710327			0.000138386	-1.5188
17874950			0.000138975	-1.70738
17740589			0.000139061	1.44507
17607485			0.000139737	1.63755
17608903			0.000139737	1.63755
17790047			0.000141437	1.76154
17850755			0.000141912	-1.63629
17703194			0.000142342	1.42636
17768185			0.00014282	-1.46849
17867461			0.000143764	-1.55355
17708295			0.000143831	1.37786
17764634			0.000143879	1.41691
17706909			0.000147166	1.45187
17775508			0.000147263	-1.45324
17623043			0.000148388	-1.47239
17665571			0.00015103	1.60181
17789810			0.000151289	-1.4315
17732506			0.000151339	1.36399
17790889			0.000151993	1.47162
17779711			0.000152249	-1.33603
17630270			0.000152758	1.50356
17690769			0.000153046	-1.4656
17761853			0.000153051	-2.96759
17770370			0.000154197	-1.32523
17734803			0.000154434	-2.46931
17882649			0.000155064	1.56736
17701208			0.000155815	1.66776
17856249			0.000156005	-1.66591
17868236			0.000156519	4.81183
17803318			0.000156968	-1.55741
17777631			0.000158381	2.78479
17782488			0.000158593	1.5815
17850819			0.000159299	1.68734
17729996			0.000159824	-16.4808
17631533			0.000160274	1.74488
17731720			0.000160915	-1.65466
17851789			0.000160922	-1.47012
17868175			0.000161409	1.54275
17734860			0.00016176	-1.5069
17774335			0.000162275	1.31748
17601041			0.000163875	3.49443
17601375			0.000163875	3.49443
17664447			0.000164166	1.4855
17636395			0.000165384	1.94281
17809712			0.000166621	1.80653
17774244			0.000166788	1.60333
17883746			0.000166843	-1.31883
17853476			0.000167349	-1.29419
17881483			0.000167473	-1.41365
17868193			0.000168418	4.51766
17757815			0.000169124	1.72566
17739999			0.000169334	1.5035
17732734			0.000170132	1.80739
17868085			0.000170527	5.08064
17639402			0.00017136	-1.3562
17792571			0.000174739	1.72395
17676538			0.0001758	-1.70827
17663989			0.000176285	1.50511
17629290			0.000176559	-1.5989
17836682			0.000177324	-1.65186
17706554			0.000178006	-1.57854
17855076			0.000178486	1.29133
17627794			0.000179225	1.82563
17658772			0.000179558	1.79087
17786684			0.000179958	2.58787
17747984			0.000181147	2.13017
17804270			0.000181159	1.61046
17730250			0.000182035	-1.66429
17734546			0.000182208	1.35184
17674979			0.000183444	3.57675
17676052			0.00018539	1.56256
17873943			0.000185448	1.37153
17659927			0.000185847	-1.55043
17612193			0.000185888	1.74461
17752169			0.000187175	-1.66511
17644871			0.000188602	-1.55109
17607045			0.000188607	1.63732
17818489			0.000189186	2.81454
17818501			0.000189186	2.81454
17818507			0.000189186	2.81454
17818513			0.000189186	2.81454
17818519			0.000189186	2.81454
17818531			0.000189186	2.81454
17818537			0.000189186	2.81454
17818547			0.000189186	2.81454
17818553			0.000189186	2.81454
17818563			0.000189186	2.81454
17818577			0.000189186	2.81454
17818581			0.000189186	2.81454
17818587			0.000189186	2.81454
17818589			0.000189186	2.81454
17818593			0.000189186	2.81454
17818599			0.000189186	2.81454
17818603			0.000189186	2.81454
17818609			0.000189186	2.81454
17676796			0.000189222	1.57425
17636301			0.000189611	-1.84071
17636302			0.000189611	-1.84071
17868301			0.000190256	2.19787
17609595			0.000191443	-2.18526
17832647			0.000192865	1.5934
17815842			0.0001954	-1.55488
17831331			0.000195414	-1.53452
17817981			0.000195577	-1.53665
17645035			0.000195642	1.50837
17736039			0.000195778	-1.82804
17869116			0.000195989	4.35493
17869514			0.000195989	4.35493
17663215			0.000196085	1.57547
17650513			0.000197513	1.63731
17701186			0.000197855	2.10303
17836200			0.000198371	-1.38112
17655761			0.000199019	1.49817
17659216			0.000199334	1.53692
17699886			0.000199732	1.70362
17637595			0.000200895	-1.38967
17673008			0.000202053	1.55223
17841835			0.000203163	-1.55541
17707340			0.000204074	-1.71695
17868290			0.000206741	4.28168
17870108			0.000207786	2.42729
17612247			0.000208828	1.84327
17839903			0.000209611	1.6596
17683509			0.000210341	-2.00343
17600943			0.000210557	1.79226
17601277			0.000210557	1.79226
17735269			0.000210798	1.4267
17648931			0.000212802	-1.89809
17836473			0.000212812	-1.48356
17778229			0.000213831	1.3395
17783481			0.000214173	2.32667
17782932			0.00021455	-1.68496
17664880			0.000214738	-1.49857
17755352			0.000215272	3.47698
17652185			0.000216817	1.46334
17790747			0.000216953	-2.54289
17638197			0.00021769	1.71963
17754673			0.00021847	1.29284
17637572			0.00021989	1.69406
17642790			0.000219994	1.2242
17841724			0.000219994	1.2242
17851407			0.000221881	-2.08397
17769371			0.000221933	1.38774
17774293			0.000222599	-1.59259
17879809			0.00022499	-1.55186
17606479			0.000225176	1.75548
17870154			0.000225606	4.68501
17828320			0.000226261	-1.47666
17609625			0.000226936	1.59487
17782270			0.000227199	1.66643
17868336			0.000228055	1.68427
17826858			0.000228082	1.26573
17767328			0.000230574	-1.66655
17817229			0.000231229	1.32711
17659670			0.000231298	-1.59266
17739125			0.000233136	-1.54178
17883133			0.000233599	-2.23163
17862986			0.000234772	1.59745
17706714			0.000234924	-1.54426
17814050			0.000236927	-1.64743
17754146			0.000237425	1.55503
17726223			0.000237887	-1.39178
17822793			0.000238868	-1.88197
17715465			0.000239045	-1.54593
17731945			0.000239124	1.82857
17661295			0.000239609	-1.5985
17606427			0.000239695	-1.9854
17871113			0.000241028	-1.6325
17723299			0.00024165	1.84371
17743449			0.000242927	-1.61992
17661499			0.000243093	-1.55293
17727973			0.000244915	1.26884
17880162			0.000245791	-1.53663
17623357			0.000247323	1.54101
17729531			0.000247557	-1.49489
17692597			0.000247985	1.50374
17883193			0.000249448	5.40399
17874025			0.000250834	-2.57152
17725508			0.000251083	1.90146
17639144			0.000251197	1.42059
17612182			0.000251914	3.63386
17739843			0.000252056	-1.47118
17699098			0.00025448	1.31429
17699100			0.00025448	1.31429
17699106			0.00025448	1.31429
17680659			0.000254828	-1.61897
17853499			0.000256896	1.81239
17649608			0.000257044	1.49814
17790011			0.000258567	-1.79654
17733708			0.00026115	-1.51413
17873938			0.000261274	1.91922
17635914			0.000261677	1.62824
17622730			0.000263686	-2.16571
17739800			0.000264907	1.71366
17805724			0.00026534	-1.98755
17836083			0.000265483	-1.81025
17870216			0.000265515	1.40632
17870273			0.000265618	1.66404
17711498			0.000265693	1.25123
17652335			0.000265786	-1.49986
17673103			0.00026642	1.82016
17870299			0.000267038	2.83242
17680459			0.000268774	1.53066
17603811			0.000270908	2.13549
17681778			0.000271091	-1.33509
17781523			0.000271661	-1.49234
17618146			0.00027356	1.84523
17869433			0.000273839	3.74275
17700956			0.000274223	1.49638
17644228			0.000274607	-1.39826
17778225			0.000274868	-1.4135
17870204			0.000277407	3.73143
17713292			0.000278479	1.642
17765469			0.000280436	-2.20083
17869581			0.000280685	3.70821
17827700			0.000281097	-2.03566
17621739			0.000282965	-1.82955
17661054			0.000285247	1.76144
17790787			0.000287524	-1.8666
17638142			0.000287773	1.54318
17604495			0.000289755	1.80031
17690057			0.000289796	1.80977
17658981			0.00028996	-1.7418
17842186			0.000290469	1.6086
17677887			0.000291167	-1.41183
17697502			0.000294585	-2.15425
17869568			0.000294898	4.058
17713436			0.000295009	1.4848
17880197			0.000296187	-1.33011
17636375			0.000297111	-1.68835
17748264			0.000297269	-1.75972
17600499			0.000297456	2.47654
17870146			0.000298554	5.2215
17715596			0.00029905	-1.38634
17812164			0.000300618	1.42981
17601197			0.00030191	2.60875
17601531			0.00030191	2.60875
17755675			0.000302532	-1.81626
17779072			0.000302821	1.41635
17658311			0.000302869	-1.39727
17619086			0.00030346	1.40221
17606415			0.000304434	-3.33544
17748630			0.000306079	-1.40346
17758035			0.000306576	-1.51512
17662518			0.000306899	-1.86481
17868566			0.000308148	1.85074
17706198			0.000308532	-1.34968
17867689			0.000309158	1.4216
17678380			0.000309262	-1.87997
17873213			0.000310009	1.69691
17636628			0.000310791	1.53105
17818411			0.000311235	1.48279
17870333			0.000312769	2.43522
17659801			0.000314839	-1.27744
17627760			0.000316309	2.50845
17835259			0.000316481	1.56313
17805665			0.00031672	-1.99585
17830353			0.00031704	-1.68549
17763623			0.000317474	1.63162
17856210			0.000317807	1.57294
17605723			0.000318435	-1.56243
17668365			0.00031858	1.3466
17794925			0.000318844	1.24479
17610037			0.000318861	2.04841
17816099			0.000319188	1.33637
17833511			0.000319661	-2.35487
17646774			0.000319711	1.27174
17860698			0.000323763	-1.42172
17628787			0.000323864	2.50892
17640286			0.000323925	-1.49583
17726845			0.000324519	1.39924
17702319			0.000325236	1.41399
17606565			0.000327106	1.80966
17689284			0.000327465	-3.18503
17865725			0.000328978	1.38726
17867395			0.000330018	1.84775
17696684			0.000330157	-1.28653
17607893			0.000330225	2.28371
17792572			0.000330872	2.61293
17808569			0.000330981	-1.37165
17697820			0.000331785	1.72432
17713329			0.000332181	-1.55933
17710515			0.000333004	-1.82721
17844933			0.000335797	1.44323
17733623			0.000336403	-1.48209
17635742			0.000337302	2.16882
17648811			0.000338115	1.37776
17740889			0.000338486	1.50922
17754970			0.000339177	1.71861
17804126			0.000339934	-1.7283
17696594			0.000340874	1.62484
17674407			0.000341339	-1.59278
17818127			0.000342416	1.34167
17829011			0.000344128	1.4611
17628747			0.000344837	3.56233
17614945			0.000345075	1.36902
17659501			0.000345674	-1.30894
17842577			0.000346013	-2.59259
17868068			0.000347804	5.22282
17603337			0.000352824	2.35525
17622570			0.000353217	-2.02814
17785631			0.000353793	-1.71726
17676874			0.000354038	-1.39029
17606599			0.000355997	-5.84419
17607243			0.000355997	-5.84419
17811098			0.000357186	2.5484
17817427			0.000357296	1.46334
17632519			0.000358714	1.92679
17699244			0.000360366	-3.5381
17624043			0.000361451	1.66115
17685125			0.000361846	-1.34869
17743777			0.000362325	2.30312
17605625			0.00036255	2.06913
17826007			0.000363108	1.7864
17838714			0.000363327	1.30684
17677050			0.000363408	-1.31394
17711611			0.000363542	1.51982
17623122			0.000364149	1.50759
17607675			0.000364847	2.12175
17609093			0.000364847	2.12175
17766196			0.000365306	-1.49945
17638866			0.000365896	-1.54711
17633471			0.000366727	3.65718
17698134			0.000366924	1.89576
17645021			0.000367646	-1.87705
17793829			0.000369916	1.40324
17829748			0.000372566	-1.37255
17882167			0.000372737	1.74865
17761845			0.000375833	-2.5576
17877895			0.000378999	1.33681
17836875			0.000380484	1.44406
17648263			0.000381204	-1.39657
17628440			0.000381292	1.32036
17607123			0.000381416	1.84133
17741868			0.000381953	-1.39333
17781655			0.000382701	1.48459
17735210			0.000386621	1.65641
17868457			0.000387526	2.35928
17840382			0.000390424	-2.06609
17796593			0.000393768	-1.58629
17774049			0.000394875	-1.39217
17750048			0.000394939	-1.27271
17787647			0.000395227	1.30019
17669427			0.000397692	1.88012
17835125			0.000398163	1.41582
17627406			0.000400241	1.26177
17867284			0.000401417	-1.46058
17681309			0.000403247	1.56924
17781773			0.000406814	-1.30818
17853610			0.000407782	-1.35432
17632285			0.000408571	-1.63716
17759845			0.000408591	1.56288
17735285			0.000410456	-1.24901
17609609			0.00041054	1.59282
17816488			0.000410828	1.29774
17619096			0.000411549	1.26891
17881667			0.000411672	-1.34019
17602635			0.000412406	2.19631
17846321			0.000414495	1.96806
17867418			0.000415905	2.14428
17865147			0.000415975	1.33544
17716171			0.000418535	1.42907
17700898			0.000419222	1.32311
17883069			0.000419433	1.40474
17701102			0.00042187	1.94585
17869387			0.000422465	1.6643
17821614			0.000422904	1.60178
17876806			0.0004232	1.30985
17880891			0.000424586	1.39326
17764608			0.000425504	1.34503
17868807			0.0004269	2.38523
17697415			0.000427208	2.20424
17869390			0.000427863	2.79524
17711044			0.000428271	2.25963
17697706			0.000428809	1.8582
17695890			0.000429087	-1.53562
17648370			0.00042945	-1.48204
17883059			0.000431843	1.54759
17881038			0.000432446	1.74424
17711649			0.000433679	1.17386
17686058			0.000435938	-1.35795
17795137			0.00043689	1.52955
17794133			0.000437004	-1.8433
17858894			0.000437011	-1.49659
17823604			0.000437169	1.47857
17772123			0.000438178	1.36458
17733972			0.000438294	-1.29005
17855757			0.000439733	-1.59398
17682212			0.000439745	1.55757
17639842			0.000442344	-1.57387
17882585			0.000442544	-1.48965
17674905			0.000443039	1.4371
17650984			0.000443129	-2.27221
17764323			0.00044516	1.82092
17640310			0.000446147	1.50004
17846887			0.000446656	-1.27147
17868801			0.00044825	5.90606
17711878			0.000448377	-1.76715
17644419			0.000448584	1.3937
17831240			0.000449114	1.38895
17880577			0.000449262	-1.80661
17829986			0.000449798	1.49176
17882479			0.000451037	1.65759
17633565			0.000451904	4.39101
17633569			0.000451904	4.39101
17748372			0.00045283	-1.37186
17602385			0.000454772	2.08846
17683159			0.000455593	-1.39011
17821739			0.000456437	-1.50795
17769970			0.0004567	-1.4201
17702014			0.000460788	-1.45415
17776744			0.000461214	-1.63077
17868798			0.000463184	1.53814
17830668			0.000463196	1.6305
17797927			0.000465138	-1.33472
17833220			0.000468161	1.3351
17770512			0.000468626	1.33672
17703814			0.000472138	1.71042
17830091			0.000474908	1.87907
17774444			0.000475276	1.5147
17843286			0.000476545	1.50262
17747629			0.000477325	1.62297
17814271			0.000480218	2.16203
17795347			0.000480364	1.35981
17875372			0.000481808	1.21314
17881233			0.000481915	-1.49199
17779762			0.00048294	-1.78782
17867306			0.00048372	-1.13824
17822258			0.000483844	-1.39574
17868226			0.000484138	6.13372
17846453			0.000484296	-1.62256
17667860			0.000485663	-1.57069
17878609			0.000485937	1.2258
17611532			0.000487323	1.74552
17645350			0.000491138	1.54144
17656657			0.000491946	1.42519
17692392			0.00049366	1.43899
17692401			0.00049366	1.43899
17641360			0.000494593	-1.339
17719628			0.000498272	1.3437
17880174			0.000502267	-1.7861
17791583			0.000503694	2.00593
17842396			0.000503878	1.4232
17702607			0.000504046	1.46675
17865170			0.000505522	1.48541
17608589			0.000506611	1.96047
17869008			0.000508017	2.57133
17861820			0.000508598	-1.27256
17654574			0.000511007	1.42937
17781606			0.000514462	1.41774
17633559			0.000516217	5.48428
17769529			0.000517094	-3.36147
17628708			0.000518856	-1.39109
17622904			0.000520428	1.54217
17736733			0.000521339	1.45245
17819357			0.000523498	1.32389
17880884			0.000525639	1.97499
17663679			0.000527374	-1.64964
17633549			0.000527427	5.47161
17633567			0.000527427	5.47161
17633573			0.000527427	5.47161
17633575			0.000527427	5.47161
17633581			0.000527427	5.47161
17633583			0.000527427	5.47161
17633585			0.000527427	5.47161
17633591			0.000527427	5.47161
17633597			0.000527427	5.47161
17633605			0.000527427	5.47161
17637977			0.000528539	-1.62124
17838723			0.000529581	1.35224
17668077			0.000532227	1.2946
17713961			0.000532657	1.39199
17868814			0.000534872	5.90259
17761844			0.000535021	-1.88946
17731565			0.000539509	-1.36053
17763310			0.000540491	-1.61439
17775329			0.000543664	1.34649
17623033			0.000544721	1.40017
17628781			0.000544869	2.82761
17799940			0.00054496	-3.36152
17851299			0.000545128	1.42947
17867118			0.000545628	-1.51144
17647477			0.000546185	1.63059
17684362			0.000548146	-1.36125
17660605			0.000548313	-1.54137
17641492			0.000549216	-1.89187
17641738			0.000549819	-1.92465
17726743			0.000549967	1.63102
17616136			0.000550721	1.37646
17713290			0.000551302	1.45443
17689048			0.000551388	-1.87569
17724513			0.0005516	-1.33771
17606351			0.000552413	1.61642
17637310			0.000553211	1.32423
17670039			0.000553707	1.33364
17611230			0.000553712	1.53791
17622637			0.000555251	-1.43125
17635727			0.000556266	1.53637
17738779			0.000556311	-1.5631
17636378			0.000556336	-1.66415
17628801			0.000558731	2.78295
17607987			0.000558802	1.7702
17802692			0.00056405	1.53133
17709590			0.000566027	-1.45747
17740496			0.000573633	-2.14884
17869685			0.000574452	1.91516
17700024			0.000576702	1.41284
17764181			0.000578986	1.58881
17869430			0.00058112	6.04238
17641955			0.000582252	-2.68546
17646585			0.000584586	-1.31642
17788369			0.000585313	-1.79078
17615047			0.00058588	-1.57909
17858835			0.000586671	-1.55024
17747408			0.000587376	1.90139
17822519			0.000587606	-1.56563
17703668			0.000587655	1.40776
17616033			0.000588126	-1.37141
17868054			0.000589229	2.56934
17694566			0.000591266	-1.84554
17857312			0.000591279	-2.36796
17827519			0.000593557	1.24404
17624347			0.000594256	-1.31904
17868685			0.000595402	1.47538
17674946			0.000598109	2.08267
17707089			0.000601435	1.30948
17800567			0.000601529	-1.3054
17608801			0.000607982	2.26742
17881263			0.000608646	-1.24357
17835350			0.000612847	1.72505
17709258			0.000612926	-1.75226
17705611			0.000613415	1.40465
17638243			0.000616301	-1.4608
17740725			0.000621558	-1.38057
17880792			0.000621835	1.37672
17780117			0.000625543	-1.53063
17813566			0.000627626	-1.69948
17822830			0.000628086	1.4606
17868134			0.000628588	2.52102
17612171			0.000628629	1.87844
17720390			0.000633809	1.53596
17614461			0.000636002	1.48175
17790335			0.000636132	3.08547
17678750			0.000637983	-2.87661
17808722			0.000638114	2.13418
17606005			0.00063907	2.00735
17821605			0.000641483	1.59494
17764472			0.000641571	1.6005
17772405			0.000641676	-1.8463
17650782			0.000642235	1.50746
17664943			0.000643339	1.53668
17854145			0.00064512	-1.33636
17868576			0.000646033	1.77059
17718329			0.000651301	1.32691
17660782			0.000651343	-2.18425
17847870			0.000651649	1.36069
17746871			0.000654865	-1.31521
17868096			0.000656698	5.4248
17774248			0.000657557	1.62535
17695704			0.000657823	-1.57319
17605753			0.000663793	1.93624
17832907			0.000666498	1.29579
17774082			0.000668585	1.3389
17883284			0.000679317	-1.63803
17720884			0.000680215	-1.74479
17880996			0.000680242	-1.64195
17839737			0.000680342	-1.94237
17850905			0.000680638	-1.72737
17834095			0.000682351	-1.35073
17757574			0.000682573	1.60141
17633557			0.000683254	4.40329
17768579			0.000683338	1.61874
17704077			0.000684141	-1.43703
17658004			0.000686645	1.43152
17608015			0.000687286	1.76329
17731947			0.000687507	2.13933
17681079			0.000688152	-1.484
17880160			0.000690226	1.66244
17754123			0.000691156	-1.34997
17602743			0.000692793	3.19023
17712173			0.00069658	1.87712
17752832			0.000698519	-1.36161
17873575			0.000700737	-1.50226
17883280			0.000702128	-1.43196
17608285			0.000702526	1.54948
17838600			0.000703784	1.38972
17613870			0.00071024	-1.35217
17667019			0.00071315	1.27268
17608013			0.000716353	2.57423
17790359			0.000716619	1.40982
17868099			0.000716739	1.34379
17696333			0.000717706	-2.47953
17848157			0.000718167	-1.47032
17875655			0.000718452	-1.60048
17870111			0.000720944	-1.41501
17861781			0.000722476	1.27226
17653426			0.000722814	-1.72861
17668398			0.000725039	-1.99449
17687521			0.000726752	-1.58335
17866618			0.000726906	-1.70317
17811690			0.000726991	-1.37066
17859500			0.000727337	-1.33511
17868811			0.000730286	1.55382
17745500			0.000734245	-1.37119
17832079			0.000739009	2.45388
17869549			0.000741372	5.7857
17781351			0.000741998	-1.48182
17692704			0.000744483	1.75463
17667363			0.000745127	-1.46231
17792037			0.000745617	1.90789
17854576			0.000747357	1.49424
17603193			0.000749411	-2.07474
17846980			0.000751064	1.38414
17727951			0.0007541	-1.44383
17872577			0.000757024	1.52604
17761793			0.000758393	1.3825
17639855			0.000760308	1.36496
17686182			0.000761621	-1.42437
17731522			0.000762609	-1.43735
17745508			0.000764079	-1.50797
17653361			0.000766585	-1.64155
17855362			0.000767242	1.45851
17671815			0.000769155	-1.66156
17776881			0.000771716	-1.44941
17862923			0.000771735	1.34425
17828539			0.000773716	1.27622
17697791			0.000775449	1.47031
17607523			0.000775824	3.36359
17608941			0.000775824	3.36359
17673043			0.00077741	-1.7512
[truncated: 1,068 more rows]
